# Supplementary material
Source: PubMed Central journal article supplement (PMC3561825)
Supplement: JCI62236sd.pdf [file JCI62236sd.pdf]

**Supplementary figure 1: *Nod2*- and *Rip2*-deficient mice showed enhanced susceptibility to DSS-induced colitis.** Single-housed wild-type (SH-WT; black circles, n=5), SH-*Nod2*<sup>-/-</sup> (gray circles, n=5) and SH-*Rip2*<sup>-/-</sup> (blue circles, n=4) mice received *ad libitum* 2% DSS for 7 days followed by 7 days of regular water. **(A)** Survival and **(B)** changes in body weight were evaluated daily and compared to that in SH-WT animals. **(C)** Representative colonoscopy and paraffin-embedded transversal sections of SH-WT, SH-*Nod2*<sup>-/-</sup> and SH-*Rip2*<sup>-/-</sup> mice colons at day 14. **(D)** Colon length and **(E)** histological scoring were evaluated at day 14.

**Supplementary Figure 2: Early enhanced IL-6-mediated response in DSS-treated *Nod2*-deficient mice.** **(A)** Protein levels of IL-6 were determined at day 9 and 14 by specific ELISA. **(B)** Immunohistochemical detection of IL-6 (brown) on colonic sections of DSS-treated WT, *Nod2*<sup>-/-</sup> and *Rip2*<sup>-/-</sup> mutant mice. IL-6 signal is detected in DC-like cells (arrowhead) and in epithelial cells. Scale bar, 50  $\mu$ m. **(C)** Protein levels of Tnf- $\alpha$  were determined at day 9 and 14 by specific ELISA. **(D)** Relative colonic transcript levels of *Reg3 $\beta$* , *Reg3 $\gamma$* , *Spp1*, *Ptgs2*, *Il10*, *Mmp13*, *Tnf $\alpha$*  and *Il6* were determined by qRT-PCR analysis at day 0, 9 and 14. Mean  $\pm$  SEM, are shown. Asterisk, significant difference  $P < 0.05$ .

**Supplementary Figure 3: Enhanced IL-6 secretion in DSS-treated *Rip2*-deficient mice failed to co-localize with either CD11b<sup>+</sup>, CD4<sup>+</sup> or CD8a<sup>+</sup> cells.** Immunofluorescent stainings of IL-6 (green) and CD11b, CD4 or CD8a (red) on colonic sections of DSS-treated WT and *Rip2*<sup>-/-</sup> mutant mice. Arrows refer to dendritic-like cells that express IL-6. E, lu and m refer to epithelial cells, lumen and muscularis mucosae respectively. Scale bar, 50  $\mu$ m.

**Supplementary Figure 4: Colonic response to fecal dysbiosis from *Nod2* deficient mice.** Wild-type animals were either single-housed (n=5) or co-housed at a 1:1 ratio with *Nod2*-deficient mice (n=5) on the same diet for a 4-week period. Microarray experiment was performed once on extracted RNAs from the colon of single-housed and co-housed WT animals **(A)** heat-map, **(B)** functional networking **(C)** and gene ontology of differentially expressed genes as determined by the Ingenuity pathway software. Significance is plotted as  $-\log(p\text{-value})$ . Only biological terms with a significant enrichment are displayed as determined by a  $|z\text{-score}| < -2$ .

**Supplementary Figure 5: *Nod2*- and microbiota-independent IL-6 and Tnf- $\alpha$  secretion by the non-diseased colonic mucosa.** **(A)** Relative colonic transcript levels of *Tnf $\alpha$*  and *Il6* in both wild-type and *Nod2*-deficient mice bred under SPF and GF conditions were determined by qRT-PCR analysis. Mean  $\pm$  SEM, are shown. Asterisk, significant difference  $P < 0.05$ .

**Supplementary Figure 6: Enhanced morbidity and mortality of *Nod2*- and *Rip2*-deficient mice in an experimental model of colitis-associated colorectal cancer.** Single-housed wild-type (SH-WT, black circles, n=10), SH-*Nod2*<sup>-/-</sup> (grey circles, n=11) and SH-*Rip2*<sup>-/-</sup> (blue circles, n=11) mice were treated with AOM (8 mg/kg). Five days later, mice received *ad libitum* 2% DSS in drinking water for 4 cycles of 5 days separated by 7-day period of regular water. **(A)** Disease activity index and **(B)** survival were monitored daily.

**Supplementary Figure 7: Enhanced IL-6, but not TNF- $\alpha$ , secretion in co-housed wild-type mice at early (but not at later) stage of intestinal tumorigenesis in an**

**experimental model of colitis-associated colorectal cancer.** Protein levels of Tnf- $\alpha$  and IL-6 were determined at day 9 and 34 by specific ELISA. Mean  $\pm$  SEM, are shown. Asterisk, significant difference  $P < 0.05$ .

**Supplementary Figure 8: Gene-plus-dysbiosis interaction result in pathological IL-6-mediated response.** Five days after AOM administration (at 12 mg/kg), mice were exposed to 4 cycles of DSS, including 7 days separated by 10-day period of regular water. A combination of antibiotics (Atb) was given (n=4 wild-type mice and n=3 *Nod2*<sup>-/-</sup> mice) or not (n=3 wild-type mice and n=2 *Nod2*<sup>-/-</sup> mice) to animals. **(A)** Venn-diagram analysis. **(B)** Gene ontology. Significance is plotted as -log(p-value). Only top three biological terms with a significant enrichment are displayed as determined by Ingenuity pathway analysis.

**Supplementary Figure 9: Differential response to antibiotics treatment as a result of Nod2 deficiency.** Transcript levels of *Reg3 $\beta$* , *Reg3 $\gamma$* , *Spp1*, *Il6*, *Ptgs2*, *Tnf $\alpha$* , *Il17a*, *Il17f* and *Il22* were determined by qRT-PCR analysis in colons from *Nod2*<sup>+/+</sup> (black circles, n=4), *Nod2*<sup>-/-</sup> (gray circles, n=3), Atb-treated WT (black circles with green border, n=4) and Atb-treated *Nod2*<sup>-/-</sup> (gray circles with green border, n=3) at day 16. Mean  $\pm$  SEM, are shown.

**Supplementary Figure 10: Anti-IL6R treatment influences Nod2-driven dysbiosis in the DSS-AOM model.** High-throughput 16S rRNA pyrosequencing was performed on chronically inflamed **(A)** and tumoral **(B)** colonic specimens isolated from *Nod2*<sup>+/+</sup> and *Nod2*<sup>-/-</sup> animals (N=4). Clusters representing 20 OTUs which primarily contribute to the shift between *Nod2*<sup>+/+</sup> and *Nod2*<sup>-/-</sup> animals were depicted. Corresponding clusters (left and right) are created based on the same OTUs. Z-score normalized OTU abundances

are color-coded. Row dendrograms display OTU abundance similarities while column dendrograms display similarities between animals (dark green for *Nod2*<sup>+/+</sup>, light green for *Nod2*<sup>-/-</sup>). Column headers represent animal IDs, which are unique within a given group.

**Supplementary Figure 11: Fecal-associated dysbiosis in *Nod2*-deficient mice is mitigated by reciprocal fecal transplantation.** High-throughput 16S rRNA pyrosequencing was performed on fecal specimens isolated from all gnotobiotic animals upon injury (N=5). **(A)** Non parametric quantification of microbiota diversity. *P*-values were determined by the Mann-Whitney U-test. Mean ± SEM, are shown. Asterisk, significant difference *P*<0.05. **(B)** Percentage abundance at the phyla level. **(C)** Clusters representing 20 OTUs which primarily contribute to the shift between the fecal-associated microbiota were depicted (N=5). Corresponding clusters (left and right) are created based on the same OTUs. Z-score normalized OTU abundances are color-coded. Row dendrograms display OTU abundance similarities while column dendrograms display similarities between animals (dark green for *Nod2*<sup>+/+</sup>, light green for *Nod2*<sup>-/-</sup>). Column headers represent animal IDs, which are unique within a given group.

**Supplementary Figure 12: Mucosal-associated dysbiosis in *Nod2*-deficient mice is mitigated by reciprocal fecal transplantation.** High-throughput 16S rRNA pyrosequencing was performed on colonic specimens isolated from all gnotobiotic animals upon injury (N=5). **(A)** Non parametric quantification of microbiota diversity. *P*-values were determined by the Mann-Whitney U-test. Mean ± SEM, are shown. Asterisk, significant difference *P*<0.05. **(B)** Percentage abundance at the phyla level. **(C)** Clusters representing 20 OTUs which primarily contribute to the shift between the

mucosal-associated microbiota were depicted. Corresponding clusters (left and right) are created based on the same OTUs. Z-score normalized OTU abundances are color-coded. Row dendrograms display OTU abundance similarities while column dendrograms display similarities between animals (dark green for *Nod2*<sup>+/+</sup>, light green for *Nod2*<sup>-/-</sup>). Column headers represent animal IDs, which are unique within a given group.

**Supplementary Table 1 : Microarray analysis on co-housed wild-type animals.**

Differentially expressed genes with a *p*-value < 0.01 and an average fold change > 1 were listed.

**Supplementary Table 2 : Gene ontology analysis on differentially expressed genes upon co-housing.** Function annotation was performed by using the Ingenuity pathway software. Regulation z-score predict function activation state.

**Supplementary Table 3 : Microarray analysis in DSS/AOM-treated wild-type and *Nod2*-deficient mice according antibiotic treatment.** First and second group described differential responsiveness of wild-type and *Nod2*-deficient mice to antibiotic treatment when compared to untreated wild-type and *Nod2*-deficient animals respectively.

**Supplementary Table 4 : Gene ontology analysis on the differential *Nod2*-dependent response to antibiotics treatment.** Function annotation was performed by using the Ingenuity pathway software.

**Supplementary Table 5 : Primers sequences for qRT-PCR and qPCR analysis**

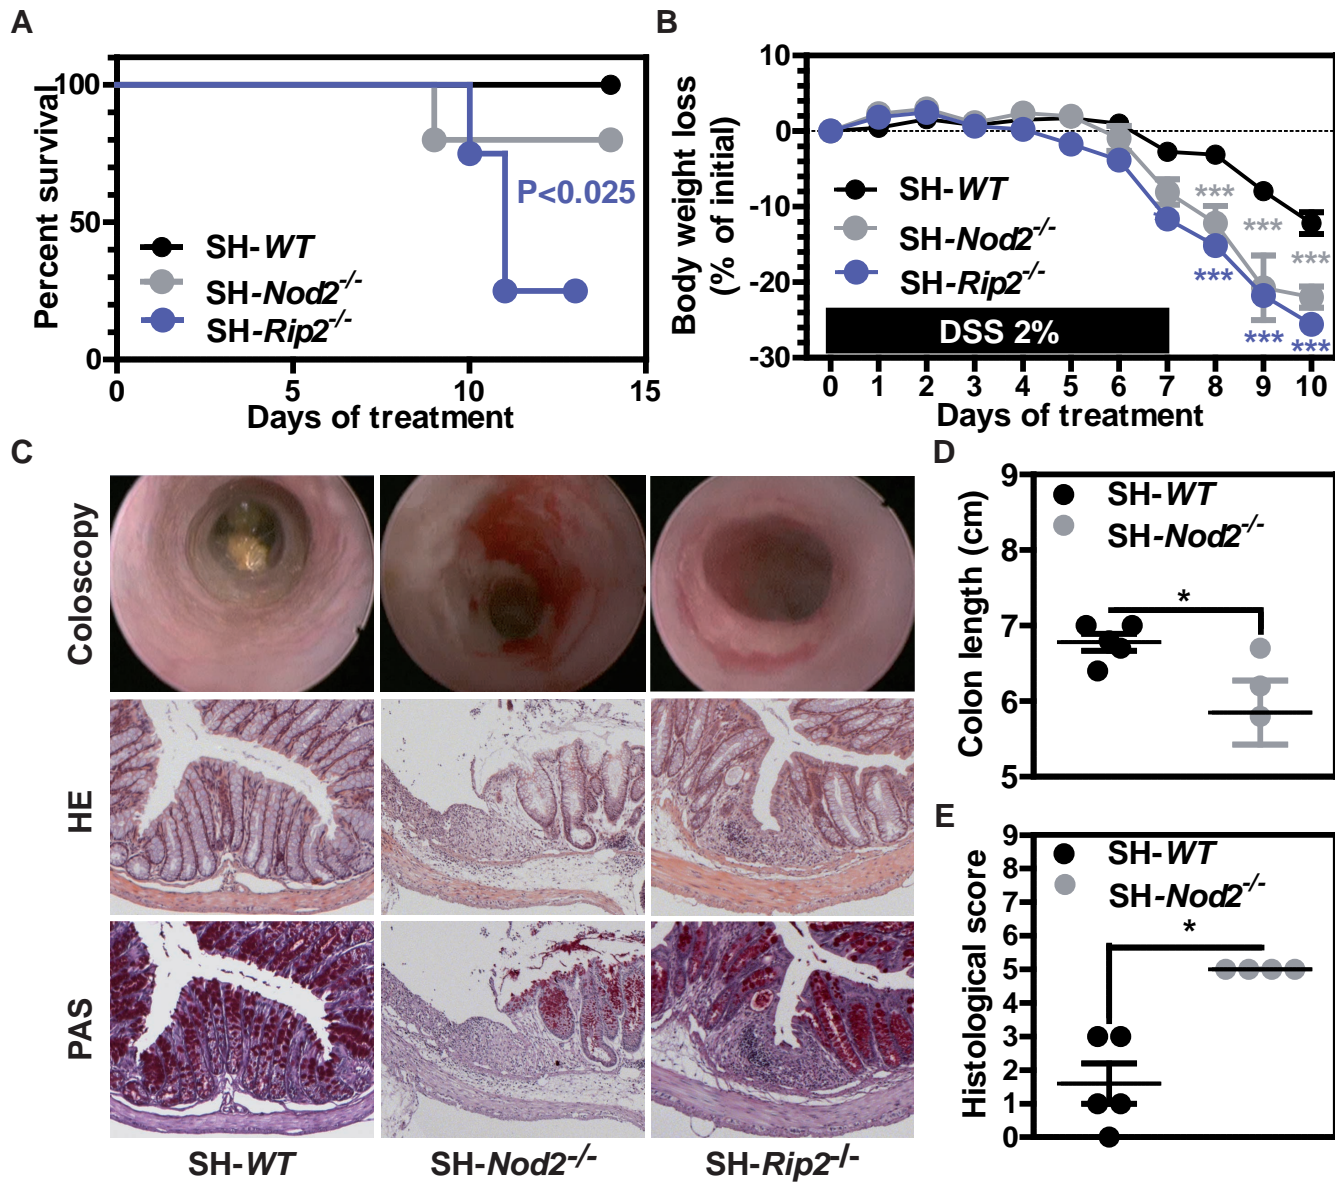

Supplementary figure 1

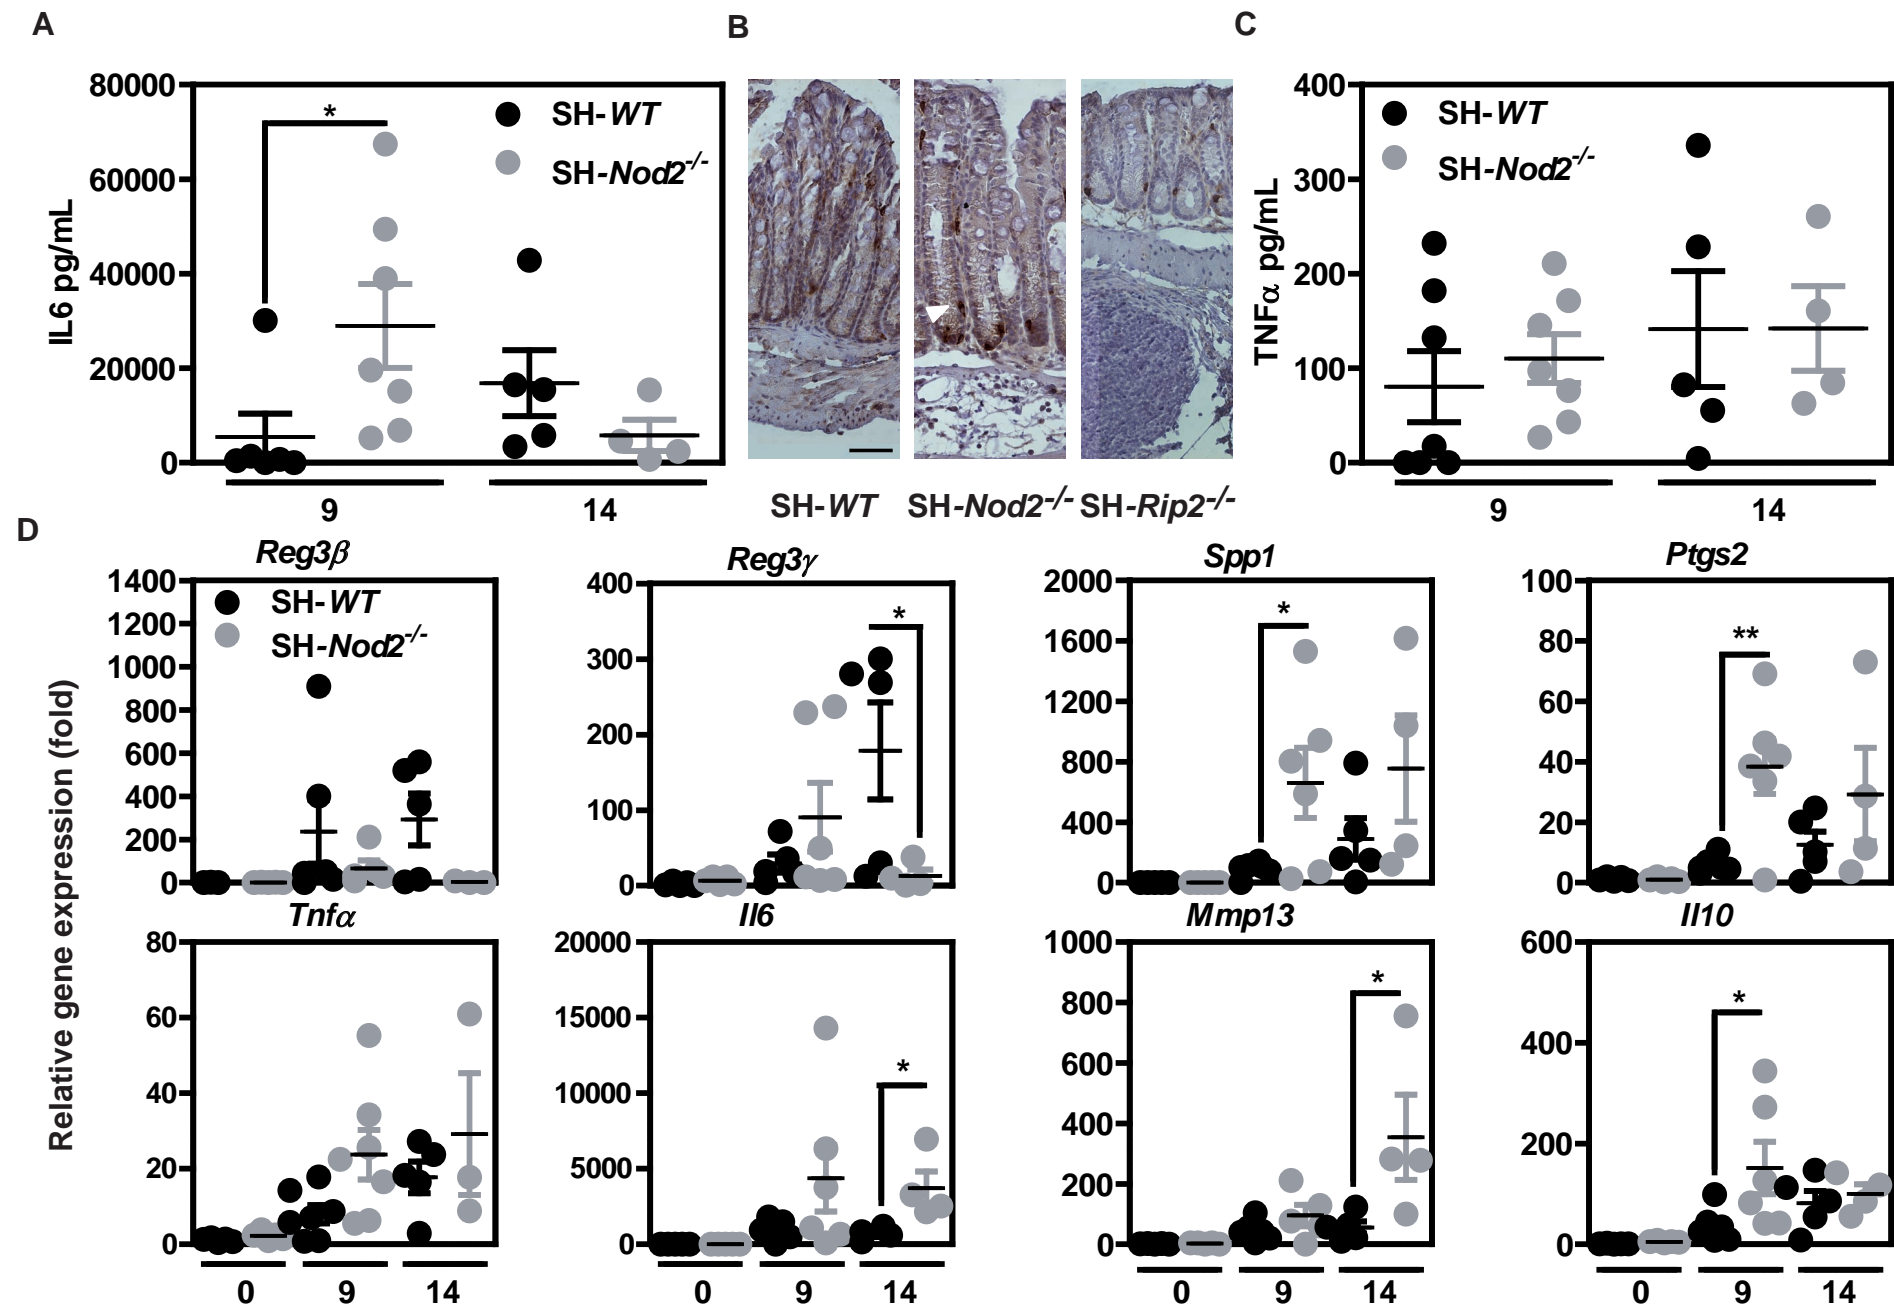

Supplementary figure 2

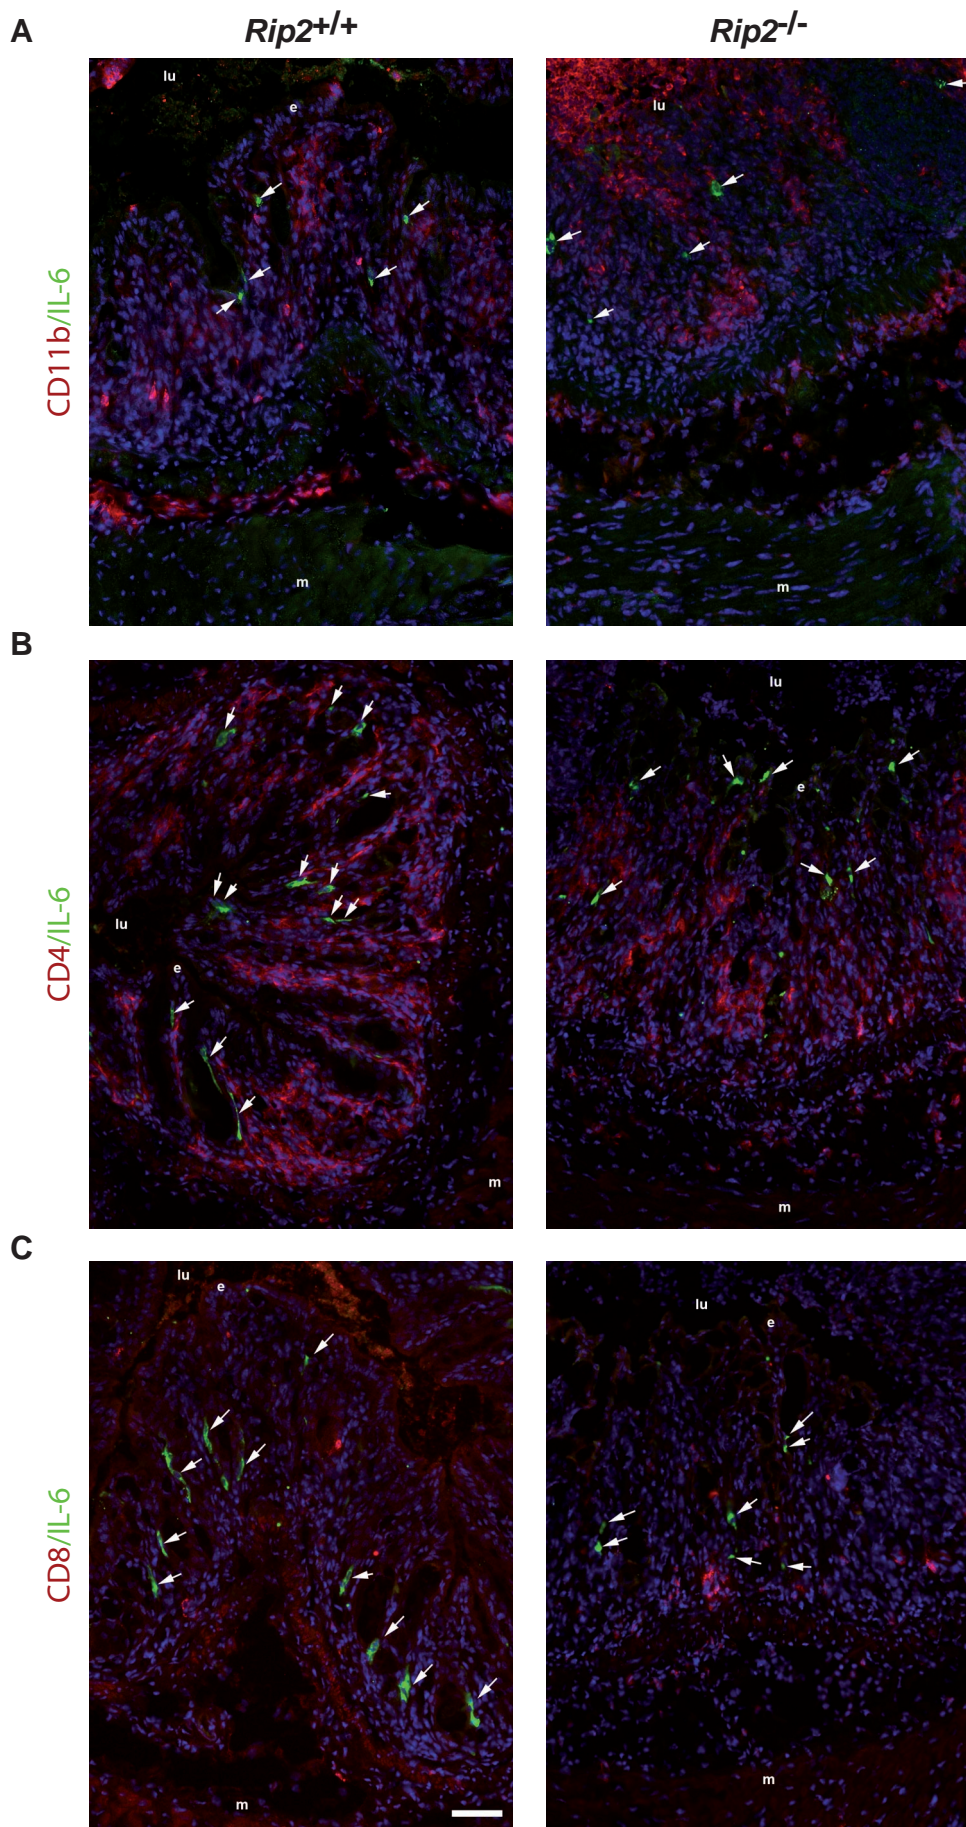

Supplementary figure 3



A

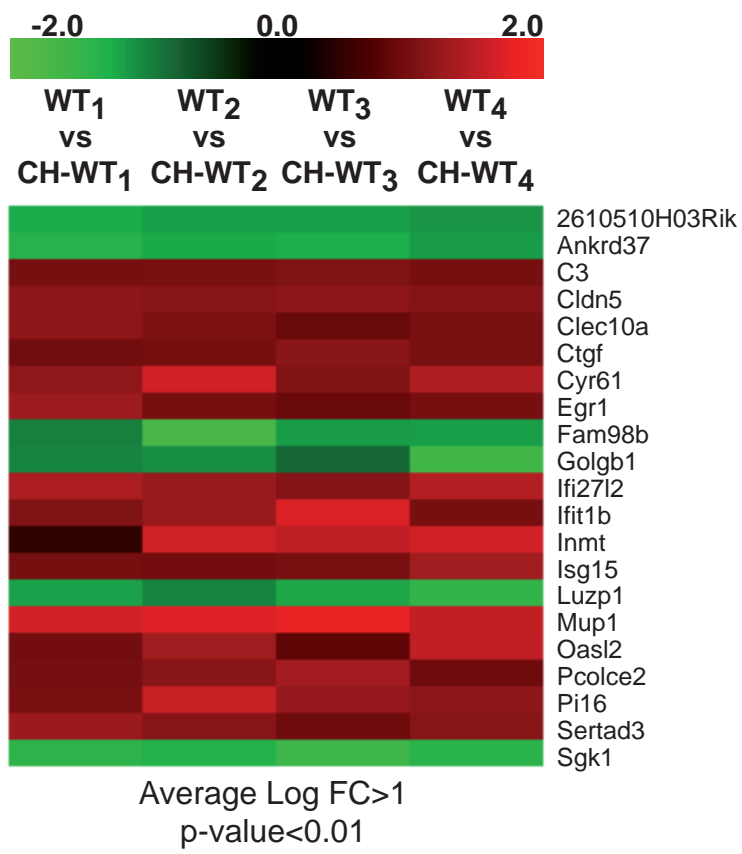

B

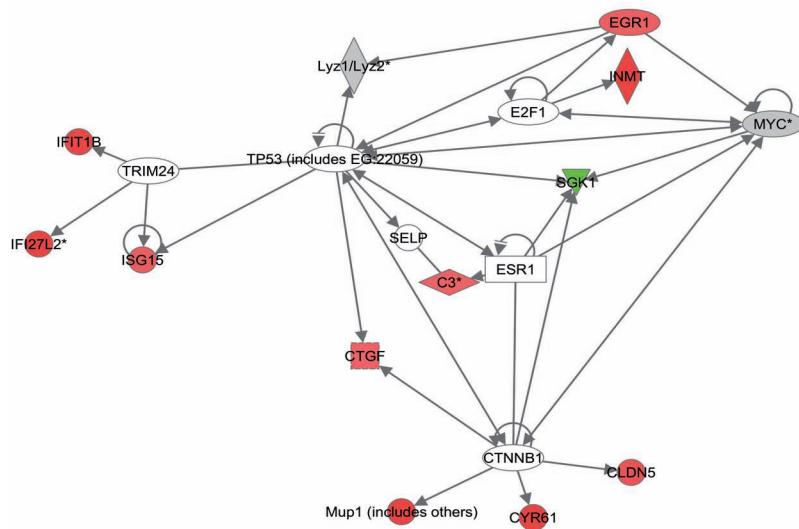

C

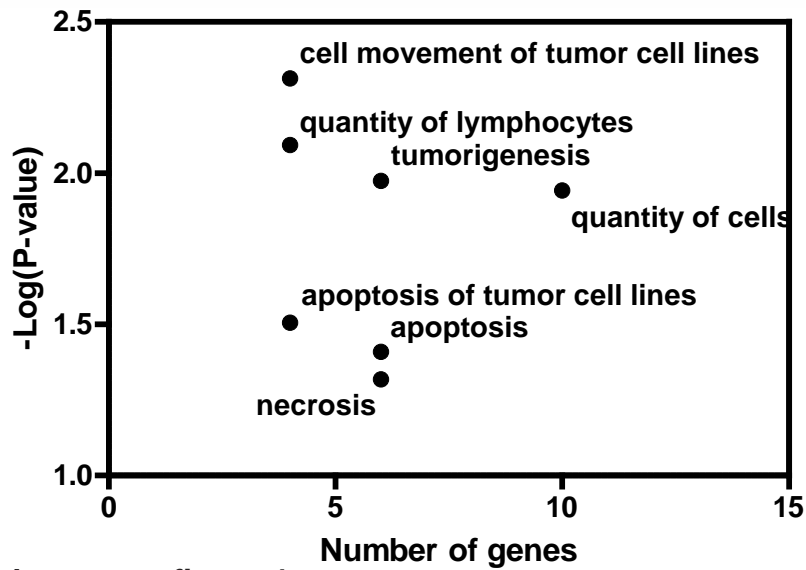

Supplementary figure 4

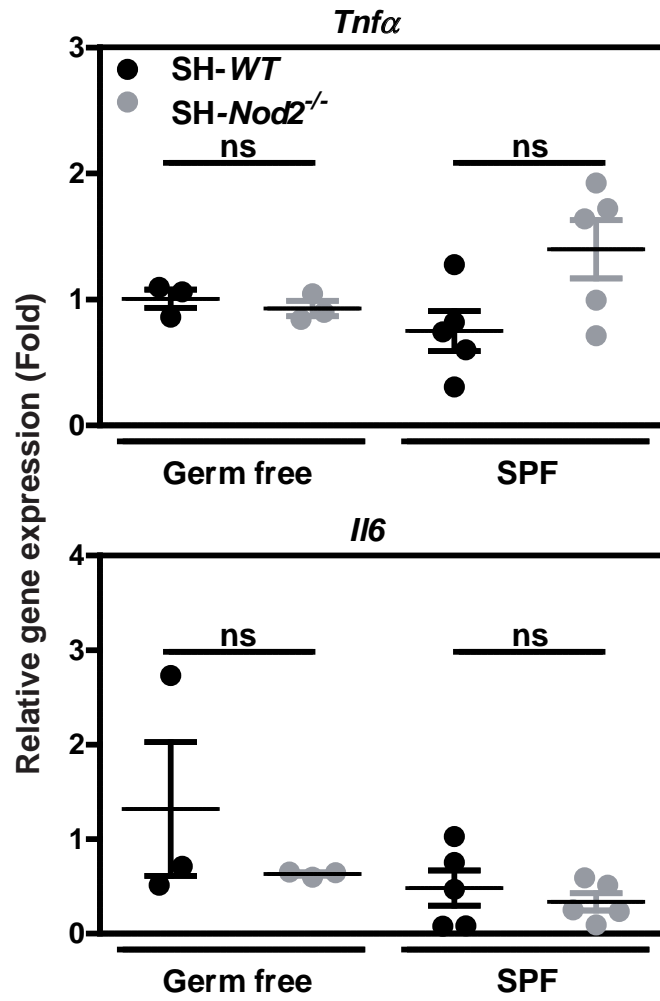

Supplementary figure 5

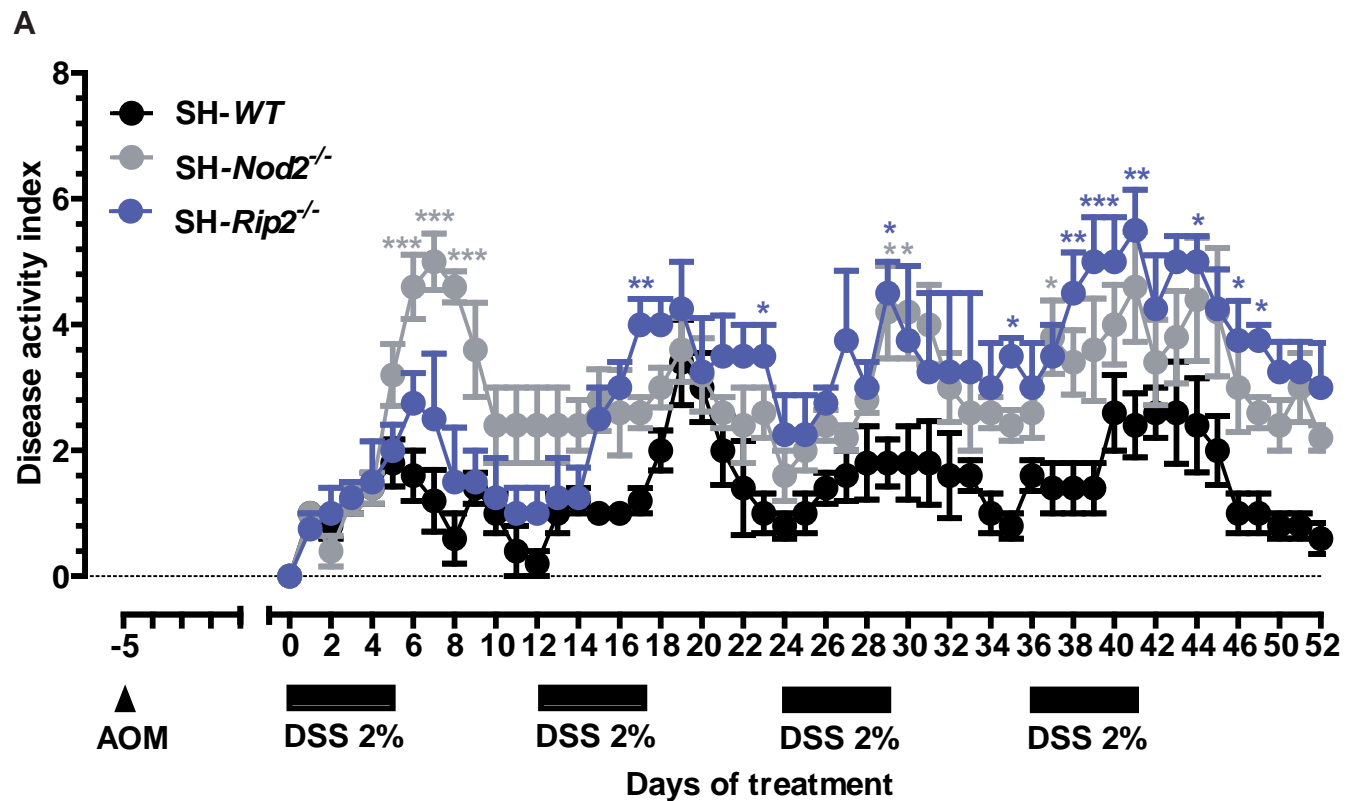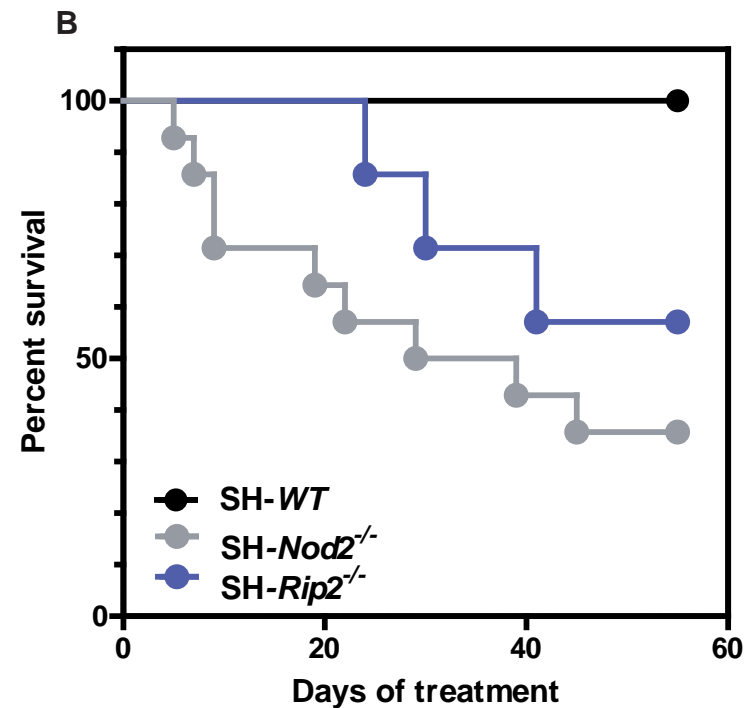

Supplementary figure 6

A

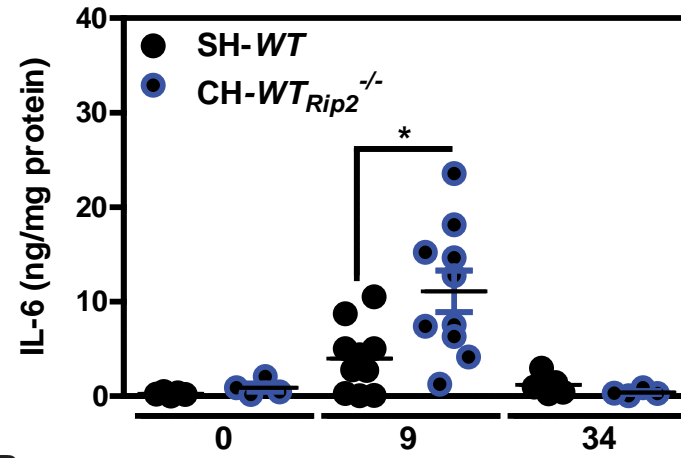

B

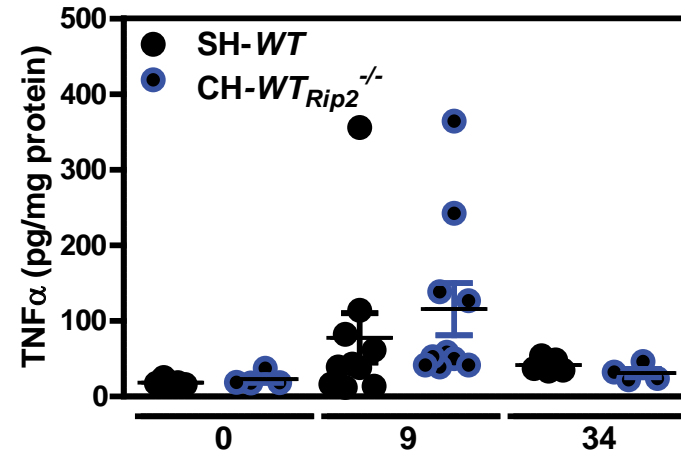

Supplementary figure 7

**A**

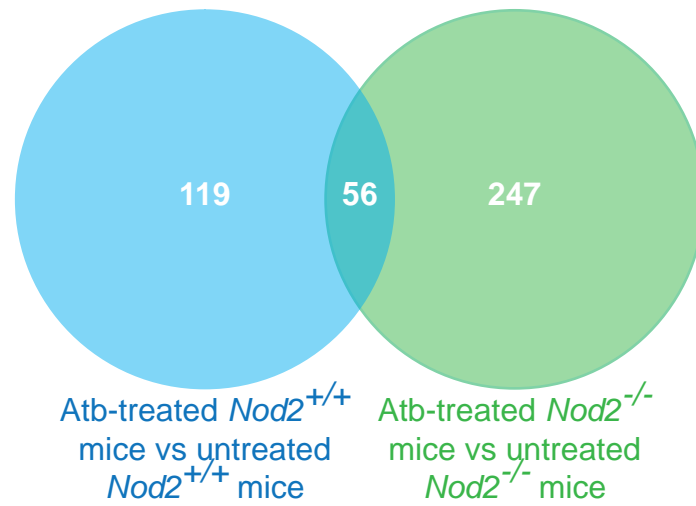

**Supplementary figure 8**

**B**

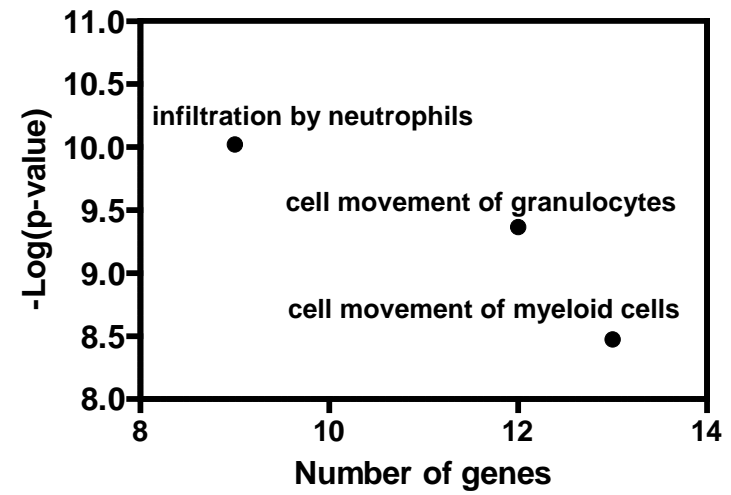

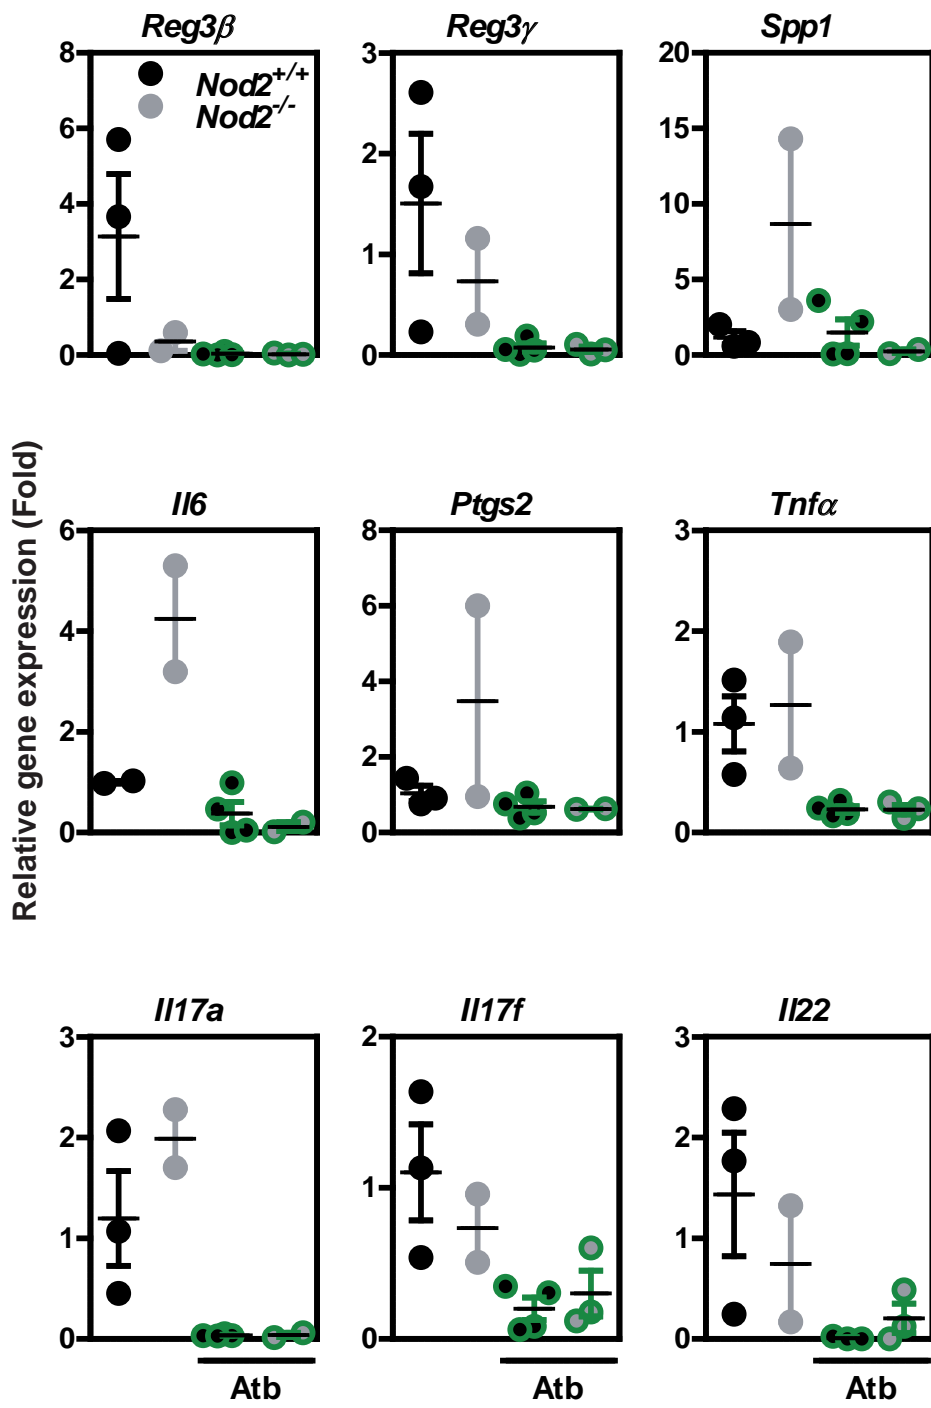

Supplementary Figure 9

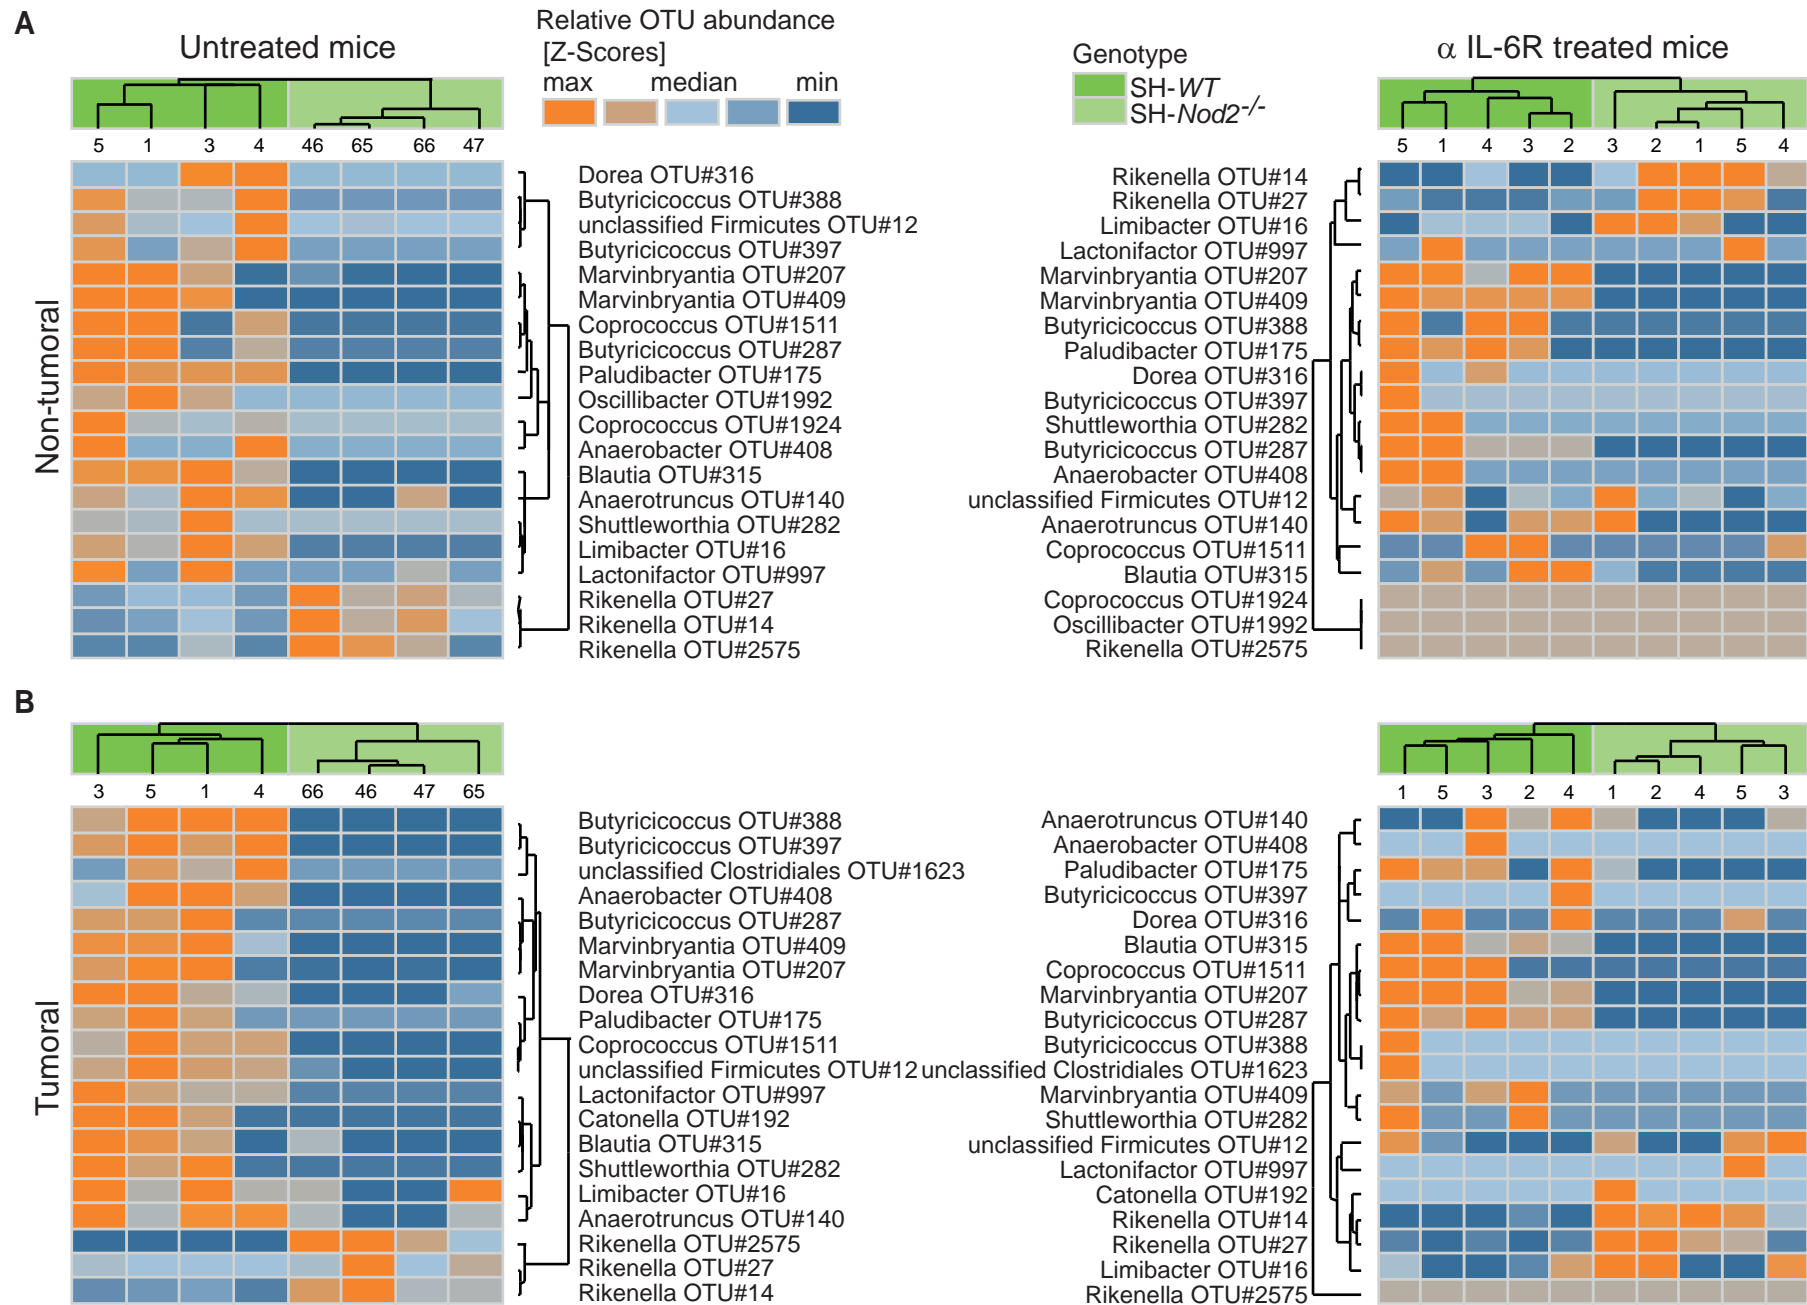

Supplementary figure 10

A

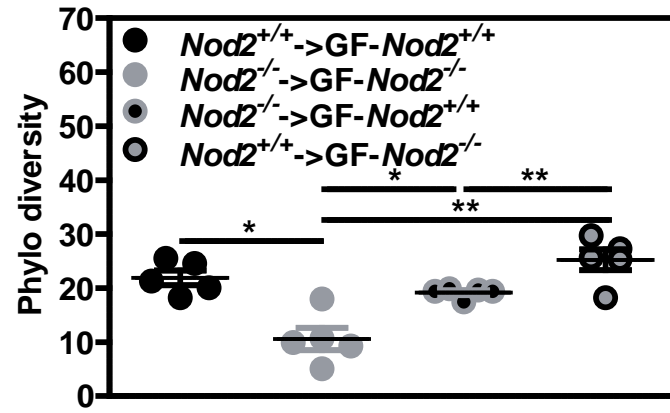

B

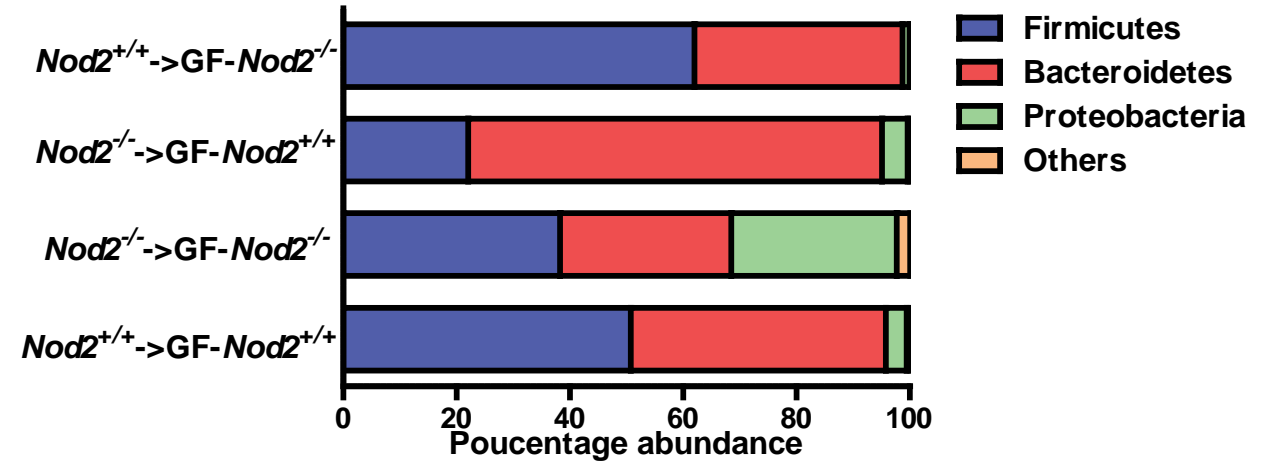

C

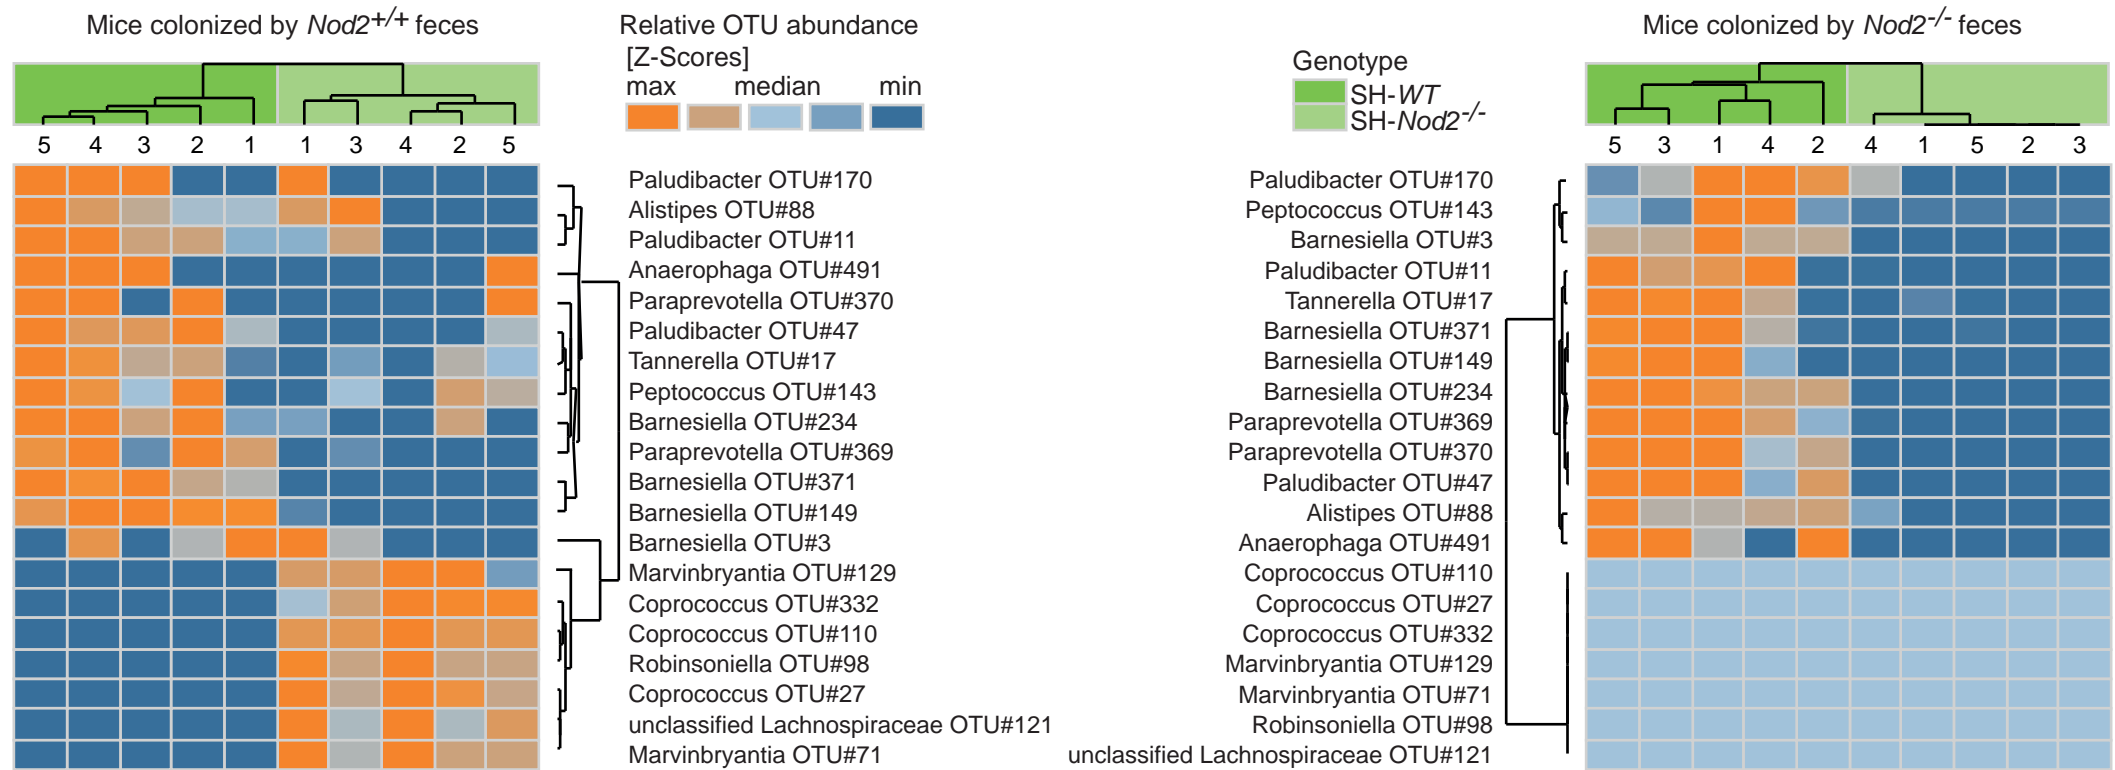

Supplementary figure 11



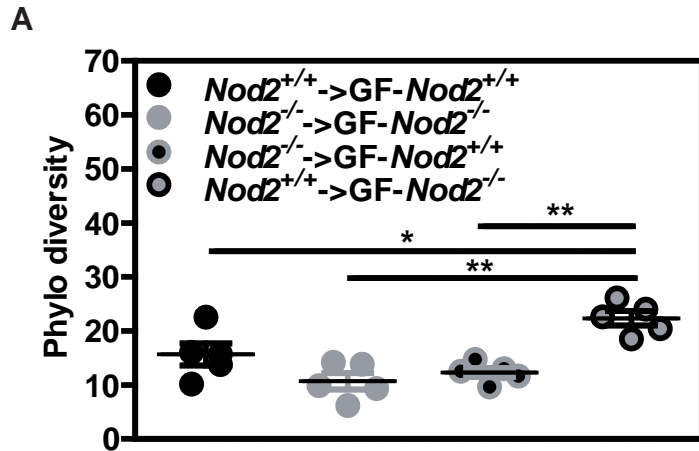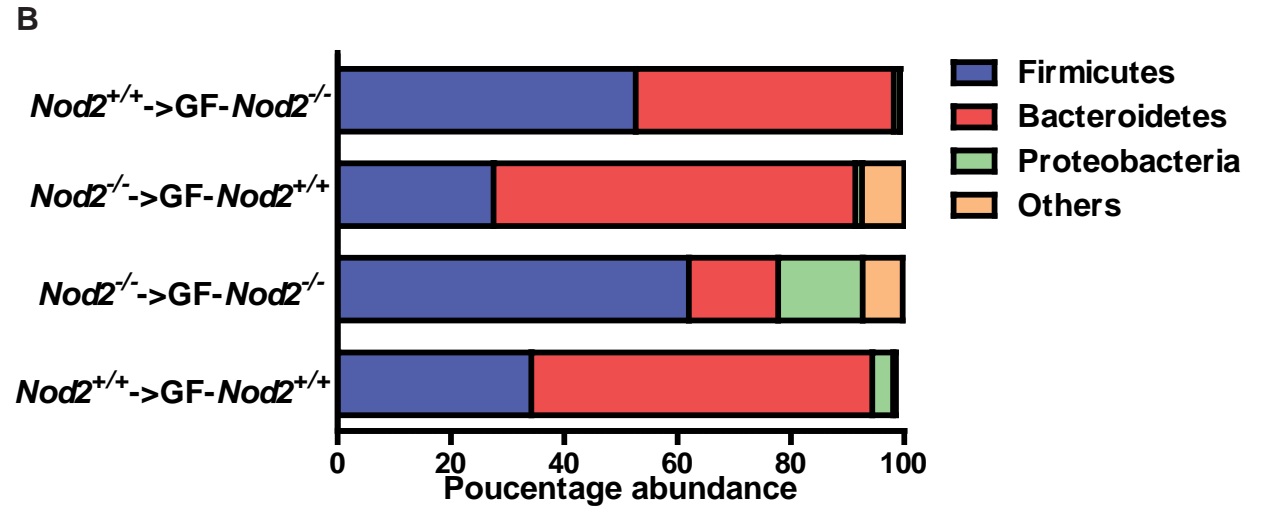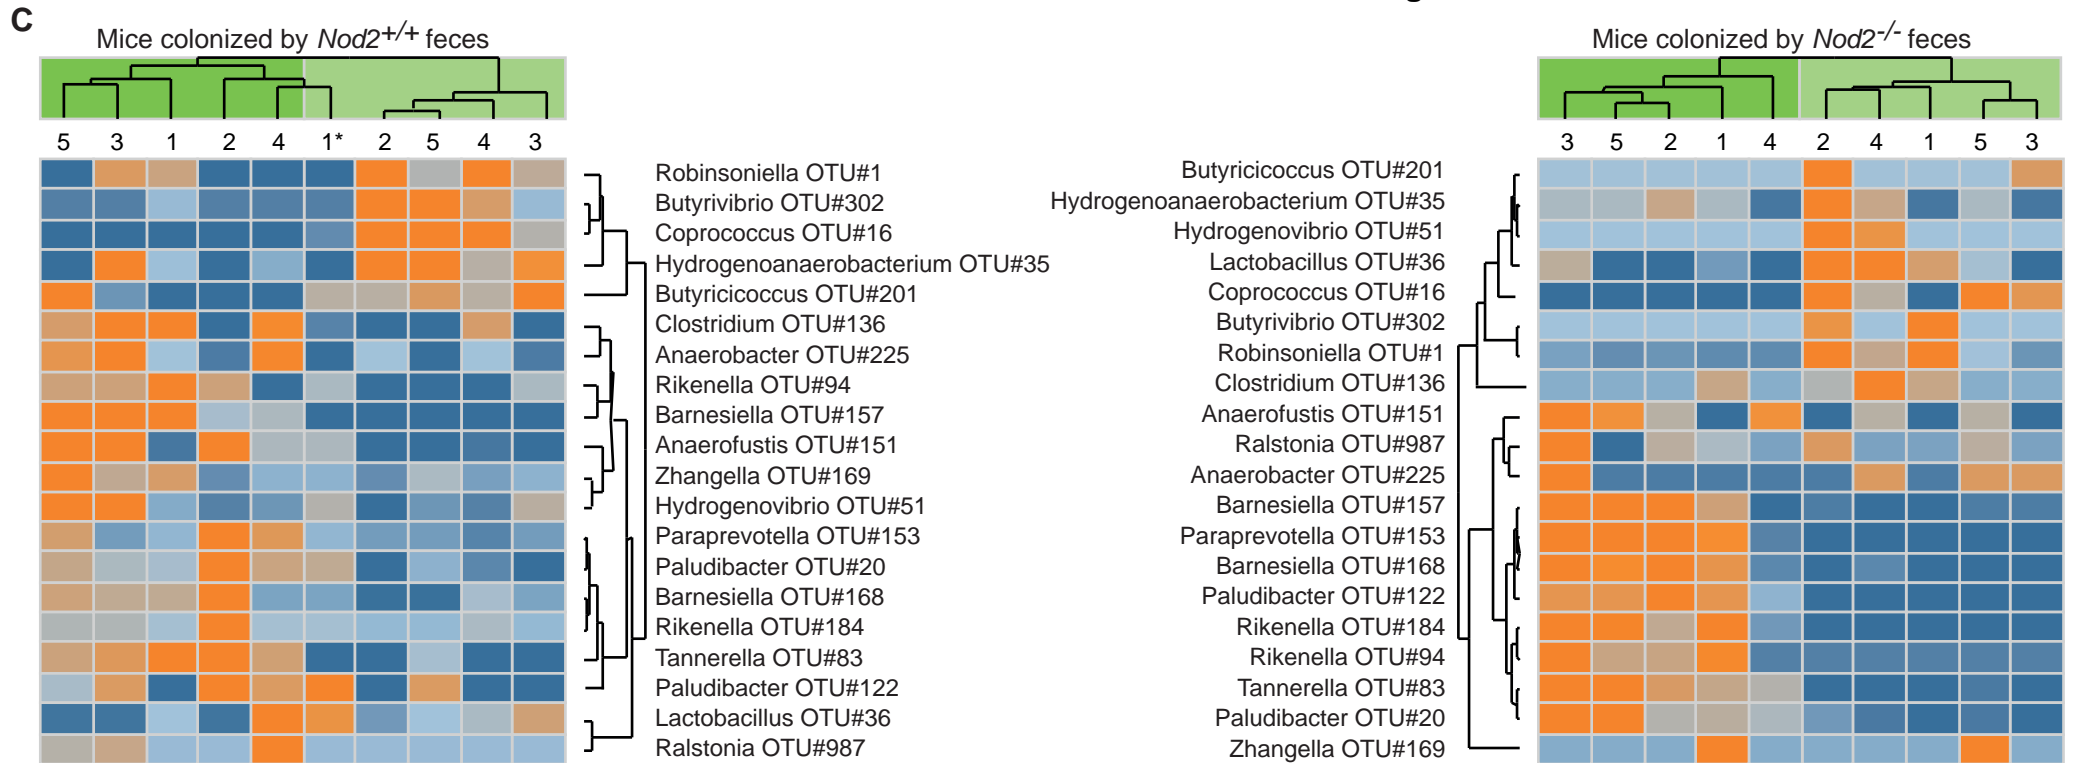

Supplementary figure 12

**Supplementary Table 1: Microarray analysis on co-housed wild-type animals.**

| <b>ID</b>    | <b>Symbol</b> | <b>Entrez Gene Name</b>                                      | <b>Log Ratio</b> | <b>p-value</b> |
|--------------|---------------|--------------------------------------------------------------|------------------|----------------|
| A_51_P272066 | 2010109I03Rik | RIKEN cDNA 2010109I03 gene                                   | -1,147           | 1,67E-06       |
| A_52_P319438 | ANKRD37       | ankyrin repeat domain 37                                     | -1,238           | 2,16E-06       |
| A_51_P110301 | C3            | complement component 3                                       | 1,002            | 1,32E-06       |
| A_51_P189814 | CLDN5         | claudin 5                                                    | 1,131            | 1,53E-06       |
| A_51_P141413 | CLEC10A       | C-type lectin domain family 10, member A                     | 1,021            | 2,20E-04       |
| A_51_P157042 | CTGF          | connective tissue growth factor                              | 1,011            | 2,65E-06       |
| A_51_P252859 | CYR61         | cysteine-rich, angiogenic inducer, 61                        | 1,310            | 1,91E-05       |
| A_51_P367866 | EGR1          | early growth response 1                                      | 1,040            | 2,55E-04       |
| A_51_P202040 | FAM98B        | family with sequence similarity 98, member B                 | -1,225           | 1,94E-04       |
| A_52_P675052 | GOLGB1        | golgin B1                                                    | -1,099           | 4,88E-04       |
| A_52_P90363  | IFI27L2       | interferon, alpha-inducible protein 27-like 2                | 1,283            | 3,72E-06       |
| A_51_P327751 | IFIT1B        | interferon-induced protein with tetratricopeptide repeats 1B | 1,251            | 4,64E-04       |
| A_51_P162162 | INMT          | indolethylamine N-methyltransferase                          | 1,305            | 4,62E-03       |
| A_52_P463936 | ISG15         | ISG15 ubiquitin-like modifier                                | 1,052            | 2,55E-05       |
| A_52_P359621 | LUZP1         | leucine zipper protein 1                                     | -1,195           | 4,61E-06       |
| A_51_P461703 | Mup1          | major urinary protein 1                                      | 1,663            | 5,24E-05       |
| A_51_P387123 | Oasl2         | 2'-5' oligoadenylate synthetase-like 2                       | 1,143            | 1,00E-04       |
| A_51_P245789 | PCOLCE2       | procollagen C-endopeptidase enhancer 2                       | 1,085            | 1,50E-05       |
| A_52_P413756 | PI16          | peptidase inhibitor 16                                       | 1,236            | 1,49E-04       |
| A_52_P71105  | SERTAD3       | SERTA domain containing 3                                    | 1,096            | 4,79E-06       |
| A_51_P118237 | SGK1          | serum/glucocorticoid regulated kinase 1                      | -1,414           | 1,12E-06       |

Supplementary Table 2 : Gene ontology analysis on differentially expressed genes upon co-housing

| Category                                              | Functions                     | Functions Annotation                                | p-Value  | -log p-Value | Predicted Activation State | Activation z-score | Molecules                                                   | # Molecules |
|-------------------------------------------------------|-------------------------------|-----------------------------------------------------|----------|--------------|----------------------------|--------------------|-------------------------------------------------------------|-------------|
| Cancer                                                | tumorigenesis                 | tumorigenesis                                       | 1.14E-02 | 1.94309515   |                            | -1.414             | C3,C3,LDN5,CLEC10A,CTGF,CYR61,EGR1,IFI272,IFIT1B,ISG15,SGK1 | 10          |
| Cell Death                                            | apoptosis                     | apoptosis of tumor cell lines                       | 3.12E-02 | 1.50584541   |                            | -0.482             | CTGF,CYR61,EGR1,SGK1                                        | 4           |
| Cell Death                                            | necrosis                      | necrosis                                            | 3.90E-02 | 1.40893539   |                            | -0.283             | 201010903Rik,C3,CTGF,CYR61,EGR1,SGK1                        | 6           |
| Cell Death                                            | apoptosis                     | apoptosis                                           | 4.81E-02 | 1.31785492   |                            | 0.065              | 201010903Rik,C3,CTGF,CYR61,EGR1,SGK1                        | 6           |
| Tissue Morphology                                     | quantity                      | quantity of cells                                   | 1.06E-02 | 1.97469413   |                            | 0.280              | C3,CLEC10A,CTGF,EGR1,ISG15,SGK1                             | 6           |
| Hematological System Development and Function         | quantity                      | quantity of lymphocytes                             | 8.08E-03 | 2.09258864   |                            | 1.154              | C3,CLEC10A,EGR1,ISG15                                       | 4           |
| Tissue Morphology                                     | quantity                      | quantity of lymphocytes                             | 8.08E-03 | 2.09258864   |                            | 1.154              | C3,CLEC10A,EGR1,ISG15                                       | 4           |
| Cellular Movement                                     | cell movement                 | cell movement of tumor cell lines                   | 4.86E-03 | 2.31336373   |                            | 1.951              | C3,CTGF,CYR61,EGR1                                          | 4           |
| Cellular Assembly and Organization                    | quantity                      | quantity of focal complexes                         | 6.38E-06 |              |                            |                    | CTGF,CYR61                                                  | 2           |
| Cell Morphology                                       | abnormal morphology           | abnormal morphology of neutrophils                  | 2.97E-05 |              |                            |                    | C3,EGR1                                                     | 2           |
| Hematological System Development and Function         | abnormal morphology           | abnormal morphology of neutrophils                  | 2.97E-05 |              |                            |                    | C3,EGR1                                                     | 2           |
| Inflammatory Response                                 | abnormal morphology           | abnormal morphology of neutrophils                  | 2.97E-05 |              |                            |                    | C3,EGR1                                                     | 2           |
| Cancer                                                | pituitary gland adenoma       | pituitary gland adenoma                             | 3.58E-04 |              |                            |                    | C3,EGR1,IFIT1B                                              | 3           |
| Cellular Compromise                                   | injury                        | injury of cells                                     | 3.96E-04 |              |                            |                    | C3,EGR1                                                     | 2           |
| Renal and Urological Disease                          | proteinuria                   | proteinuria                                         | 4.07E-04 |              |                            |                    | C3,CTGF,SGK1                                                | 3           |
| Cellular Growth and Proliferation                     | colony formation              | colony formation of carcinoma cell lines            | 5.18E-04 |              |                            |                    | CYR61,EGR1                                                  | 2           |
| Digestive System Development and Function             | regeneration                  | regeneration of liver                               | 5.51E-04 |              |                            |                    | C3,EGR1                                                     | 2           |
| Hepatic System Development and Function               | regeneration                  | regeneration of liver                               | 5.51E-04 |              |                            |                    | C3,EGR1                                                     | 2           |
| Organ Morphology                                      | regeneration                  | regeneration of liver                               | 5.51E-04 |              |                            |                    | C3,EGR1                                                     | 2           |
| Cancer                                                | benign tumor                  | benign tumor                                        | 1.01E-03 |              |                            |                    | C3,CTGF,CYR61,EGR1,IFIT1B                                   | 5           |
| Hepatic System Development and Function               | adhesion                      | adhesion of hepatic stellate cells                  | 1.07E-03 |              |                            |                    | CTGF                                                        | 1           |
| Cell-To-Cell Signaling and Interaction                | adhesion                      | adhesion of hepatic stellate cells                  | 1.07E-03 |              |                            |                    | CTGF                                                        | 1           |
| Connective Tissue Development and Function            | adhesion                      | adhesion of hepatic stellate cells                  | 1.07E-03 |              |                            |                    | CTGF                                                        | 1           |
| Tissue Adhesion                                       | adhesion                      | adhesion of hepatic stellate cells                  | 1.07E-03 |              |                            |                    | CTGF                                                        | 1           |
| Cardiovascular System Development and Function        | angiogenesis                  | angiogenesis of growth plate                        | 1.07E-03 |              |                            |                    | CTGF                                                        | 1           |
| Connective Tissue Development and Function            | angiogenesis                  | angiogenesis of growth plate                        | 1.07E-03 |              |                            |                    | CTGF                                                        | 1           |
| Embryonic Development                                 | angiogenesis                  | angiogenesis of growth plate                        | 1.07E-03 |              |                            |                    | CTGF                                                        | 1           |
| Organ Development                                     | angiogenesis                  | angiogenesis of growth plate                        | 1.07E-03 |              |                            |                    | CTGF                                                        | 1           |
| Organismal Development                                | angiogenesis                  | angiogenesis of growth plate                        | 1.07E-03 |              |                            |                    | CTGF                                                        | 1           |
| Skeletal and Muscular System Development and Function | angiogenesis                  | angiogenesis of growth plate                        | 1.07E-03 |              |                            |                    | CTGF                                                        | 1           |
| Tissue Development                                    | angiogenesis                  | angiogenesis of growth plate                        | 1.07E-03 |              |                            |                    | CTGF                                                        | 1           |
| Cellular Response to Therapeutics                     | antiestrogen resistance       | antiestrogen resistance of breast cancer cell lines | 1.07E-03 |              |                            |                    | CYR61                                                       | 1           |
| Drug Metabolism                                       | antiestrogen resistance       | antiestrogen resistance of breast cancer cell lines | 1.07E-03 |              |                            |                    | CYR61                                                       | 1           |
| Cell Death                                            | cytotoxicity                  | cytotoxicity of hepatoma cell lines                 | 1.07E-03 |              |                            |                    | SGK1                                                        | 1           |
| Cancer                                                | hyperplasia                   | delay in hyperplasia of hepatocytes                 | 1.07E-03 |              |                            |                    | C3                                                          | 1           |
| Gastrointestinal Disease                              | hyperplasia                   | delay in hyperplasia of hepatocytes                 | 1.07E-03 |              |                            |                    | C3                                                          | 1           |
| Hepatic System Disease                                | hyperplasia                   | delay in hyperplasia of hepatocytes                 | 1.07E-03 |              |                            |                    | C3                                                          | 1           |
| Tissue Morphology                                     | removal                       | delay in removal of parenchyma                      | 1.07E-03 |              |                            |                    | C3                                                          | 1           |
| Cellular Movement                                     | dissemination                 | dissemination of hepatoma cell lines                | 1.07E-03 |              |                            |                    | CTGF                                                        | 1           |
| Connective Tissue Development and Function            | endochondral ossification     | endochondral ossification of growth plate           | 1.07E-03 |              |                            |                    | CTGF                                                        | 1           |
| Embryonic Development                                 | endochondral ossification     | endochondral ossification of growth plate           | 1.07E-03 |              |                            |                    | CTGF                                                        | 1           |
| Organ Development                                     | endochondral ossification     | endochondral ossification of growth plate           | 1.07E-03 |              |                            |                    | CTGF                                                        | 1           |
| Organismal Development                                | endochondral ossification     | endochondral ossification of growth plate           | 1.07E-03 |              |                            |                    | CTGF                                                        | 1           |
| Skeletal and Muscular System Development and Function | endochondral ossification     | endochondral ossification of growth plate           | 1.07E-03 |              |                            |                    | CTGF                                                        | 1           |
| Tissue Development                                    | endochondral ossification     | endochondral ossification of growth plate           | 1.07E-03 |              |                            |                    | CTGF                                                        | 1           |
| Hematological System Development and Function         | erythropoiesis                | erythropoiesis of splenocytes                       | 1.07E-03 |              |                            |                    | EGR1                                                        | 1           |
| Cellular Development                                  | erythropoiesis                | erythropoiesis of splenocytes                       | 1.07E-03 |              |                            |                    | EGR1                                                        | 1           |
| Embryonic Development                                 | erythropoiesis                | erythropoiesis of splenocytes                       | 1.07E-03 |              |                            |                    | EGR1                                                        | 1           |
| Hematopoiesis                                         | erythropoiesis                | erythropoiesis of splenocytes                       | 1.07E-03 |              |                            |                    | EGR1                                                        | 1           |
| Lymphoid Tissue Structure and Development             | erythropoiesis                | erythropoiesis of splenocytes                       | 1.07E-03 |              |                            |                    | EGR1                                                        | 1           |
| Organ Development                                     | erythropoiesis                | erythropoiesis of splenocytes                       | 1.07E-03 |              |                            |                    | EGR1                                                        | 1           |
| Organismal Development                                | erythropoiesis                | erythropoiesis of splenocytes                       | 1.07E-03 |              |                            |                    | EGR1                                                        | 1           |
| Tissue Development                                    | erythropoiesis                | erythropoiesis of splenocytes                       | 1.07E-03 |              |                            |                    | EGR1                                                        | 1           |
| Infectious Disease                                    | infection                     | infection by Chikungunya virus                      | 1.07E-03 |              |                            |                    | ISG15                                                       | 1           |
| Cell-To-Cell Signaling and Interaction                | long-term potentiation        | long-term potentiation of dentate gyrus             | 1.07E-03 |              |                            |                    | EGR1                                                        | 1           |
| Nervous System Development and Function               | long-term potentiation        | long-term potentiation of dentate gyrus             | 1.07E-03 |              |                            |                    | EGR1                                                        | 1           |
| Hepatic System Development and Function               | metaphase/anaphase transition | metaphase/anaphase transition of liver cells        | 1.07E-03 |              |                            |                    | EGR1                                                        | 1           |
| Cell Cycle                                            | metaphase/anaphase transition | metaphase/anaphase transition of liver cells        | 1.07E-03 |              |                            |                    | EGR1                                                        | 1           |
| Hematological System Development and Function         | opsonization                  | opsonization of red blood cells                     | 1.07E-03 |              |                            |                    | C3                                                          | 1           |
| Cell Death                                            | opsonization                  | opsonization of red blood cells                     | 1.07E-03 |              |                            |                    | C3                                                          | 1           |
| Cellular Growth and Proliferation                     | outgrowth                     | outgrowth of breast cancer cell lines               | 1.07E-03 |              |                            |                    | CYR61                                                       | 1           |
| Cellular Development                                  | outgrowth                     | outgrowth of breast cancer cell lines               | 1.07E-03 |              |                            |                    | CYR61                                                       | 1           |
| Cardiovascular System Development and Function        | structural integrity          | structural integrity of vasculature                 | 1.07E-03 |              |                            |                    | CYR61                                                       | 1           |
| Cancer                                                | tumorigenesis                 | tumorigenesis of endometrial cancer cell lines      | 1.07E-03 |              |                            |                    | CYR61                                                       | 1           |
| Reproductive System Development and Function          | function                      | function of reproductive system                     | 1.07E-03 |              |                            |                    | C3,EGR1                                                     | 2           |
| Connective Tissue Development and Function            | quantity                      | quantity of connective tissue cells                 | 1.21E-03 |              |                            |                    | C3,CTGF,EGR1                                                | 3           |
| Tissue Morphology                                     | quantity                      | quantity of connective tissue cells                 | 1.21E-03 |              |                            |                    | C3,CTGF,EGR1                                                | 3           |
| Reproductive System Disease                           | endometriosis                 | endometriosis                                       | 1.32E-03 |              |                            |                    | CTGF,CYR61,EGR1,SGK1                                        | 4           |
| Renal and Urological Disease                          | albuminuria                   | albuminuria                                         | 1.59E-03 |              |                            |                    | CTGF,SGK1                                                   | 2           |
| Metabolic Disease                                     | albuminuria                   | albuminuria                                         | 1.59E-03 |              |                            |                    | CTGF,SGK1                                                   | 2           |
| Reproductive System Development and Function          | ovulation                     | ovulation                                           | 1.82E-03 |              |                            |                    | CTGF,EGR1                                                   | 2           |
| Connective Tissue Development and Function            | apposition                    | apposition of femur                                 | 2.13E-03 |              |                            |                    | CTGF                                                        | 1           |
| Skeletal and Muscular System Development and Function | apposition                    | apposition of femur                                 | 2.13E-03 |              |                            |                    | CTGF                                                        | 1           |
| Cellular Compromise                                   | atrophy                       | atrophy of Leydig cells                             | 2.13E-03 |              |                            |                    | EGR1                                                        | 1           |
| Organismal Injury and Abnormalities                   | atrophy                       | atrophy of Leydig cells                             | 2.13E-03 |              |                            |                    | EGR1                                                        | 1           |
| Lipid Metabolism                                      | clearance                     | clearance of fatty acid                             | 2.13E-03 |              |                            |                    | C3                                                          | 1           |
| Molecular Transport                                   | clearance                     | clearance of fatty acid                             | 2.13E-03 |              |                            |                    | C3                                                          | 1           |
| Small Molecule Biochemistry                           | clearance                     | clearance of fatty acid                             | 2.13E-03 |              |                            |                    | C3                                                          | 1           |
| Cellular Growth and Proliferation                     | colony formation              | colony formation of endometrial cancer cell lines   | 2.13E-03 |              |                            |                    | CYR61                                                       | 1           |
| Infectious Disease                                    | infection                     | infection of central nervous system                 | 2.13E-03 |              |                            |                    | CTGF                                                        | 1           |
| Neurological Disease                                  | infection                     | infection of central nervous system                 | 2.13E-03 |              |                            |                    | C3                                                          | 1           |
| Infectious Disease                                    | infectivity                   | infectivity of Zaire ebolavirus                     | 2.13E-03 |              |                            |                    | CLEC10A                                                     | 1           |
| Hematological System Development and Function         | localization                  | localization of neutrophils                         | 2.13E-03 |              |                            |                    | C3                                                          | 1           |
| Inflammatory Response                                 | localization                  | localization of neutrophils                         | 2.13E-03 |              |                            |                    | C3                                                          | 1           |
| Cellular Movement                                     | localization                  | localization of neutrophils                         | 2.13E-03 |              |                            |                    | C3                                                          | 1           |
| Cellular Function and Maintenance                     | localization                  | localization of neutrophils                         | 2.13E-03 |              |                            |                    | C3                                                          | 1           |
| Immune Cell Trafficking                               | localization                  | localization of neutrophils                         | 2.13E-03 |              |                            |                    | C3                                                          | 1           |

|                                                       |                       |                                                            |          |                                                     |   |  |
|-------------------------------------------------------|-----------------------|------------------------------------------------------------|----------|-----------------------------------------------------|---|--|
| Hematological System Development and Function         |                       |                                                            |          |                                                     |   |  |
| Cellular Development                                  | metabolism            | metabolism of thymocytes                                   | 2,13E-03 | EGR1                                                | 1 |  |
| Hematopoiesis                                         | metabolism            | metabolism of thymocytes                                   | 2,13E-03 | EGR1                                                | 1 |  |
| Lymphoid Tissue Structure and Development             | metabolism            | metabolism of thymocytes                                   | 2,13E-03 | EGR1                                                | 1 |  |
| Cell-mediated Immune Response                         | metabolism            | metabolism of thymocytes                                   | 2,13E-03 | EGR1                                                | 1 |  |
| Cellular Function and Maintenance                     | metabolism            | metabolism of thymocytes                                   | 2,13E-03 | EGR1                                                | 1 |  |
| Cell Morphology                                       | morphology            | morphology of germ cell tumor cell lines                   | 2,13E-03 | EGR1                                                | 1 |  |
| Cell Morphology                                       | morphology            | morphology of somatotrophs                                 | 2,13E-03 | EGR1                                                | 1 |  |
| Organ Morphology                                      | morphology            | morphology of somatotrophs                                 | 2,13E-03 | EGR1                                                | 1 |  |
| Nervous System Development and Function               | morphology            | morphology of somatotrophs                                 | 2,13E-03 | EGR1                                                | 1 |  |
| Reproductive System Development and Function          | morphology            | morphology of somatotrophs                                 | 2,13E-03 | EGR1                                                | 1 |  |
| Endocrine System Development and Function             | morphology            | morphology of somatotrophs                                 | 2,13E-03 | EGR1                                                | 1 |  |
| Lipid Metabolism                                      | production            | production of 1-oleoylglycerol                             | 2,13E-03 | C3                                                  | 1 |  |
| Small Molecule Biochemistry                           | production            | production of 1-oleoylglycerol                             | 2,13E-03 | C3                                                  | 1 |  |
| Organismal Injury and Abnormalities                   | interstitial fibrosis | interstitial fibrosis                                      | 2,53E-03 | C3,EGR1                                             | 2 |  |
| Digestive System Development and Function             | function              | function of liver                                          | 2,68E-03 | C3,EGR1                                             | 2 |  |
| Hepatic System Development and Function               | function              | function of liver                                          | 2,68E-03 | C3,EGR1                                             | 2 |  |
| Organ Development                                     | function              | function of liver                                          | 2,68E-03 | C3,EGR1                                             | 2 |  |
| Cell-To-Cell Signaling and Interaction                | adhesion              | adhesion of epithelial cells                               | 2,97E-03 | 2010109103Rik,C3                                    | 2 |  |
| Tissue Development                                    | adhesion              | adhesion of epithelial cells                               | 2,97E-03 | 2010109103Rik,C3                                    | 2 |  |
| Cell-To-Cell Signaling and Interaction                | adhesion              | adhesion of vascular smooth muscle cells                   | 3,19E-03 | CYR61                                               | 1 |  |
| Skeletal and Muscular System Development and Function | adhesion              | adhesion of vascular smooth muscle cells                   | 3,19E-03 | CYR61                                               | 1 |  |
| Tissue Development                                    | adhesion              | adhesion of vascular smooth muscle cells                   | 3,19E-03 | CYR61                                               | 1 |  |
| Cellular Growth and Proliferation                     | growth                | arrest in growth of melanoma cells                         | 3,19E-03 | EGR1                                                | 1 |  |
| Cellular Development                                  | growth                | arrest in growth of melanoma cells                         | 3,19E-03 | EGR1                                                | 1 |  |
| Tumor Morphology                                      | growth                | arrest in growth of melanoma cells                         | 3,19E-03 | EGR1                                                | 1 |  |
| Cellular Assembly and Organization                    | formation             | delay in formation of actin stress fibers                  | 3,19E-03 | CTGF                                                | 1 |  |
| Tissue Development                                    | formation             | delay in formation of actin stress fibers                  | 3,19E-03 | CTGF                                                | 1 |  |
| Cellular Function and Maintenance                     | formation             | delay in formation of actin stress fibers                  | 3,19E-03 | CTGF                                                | 1 |  |
| Cellular Compromise                                   | disassembly           | disassembly of actin                                       | 3,19E-03 | CTGF                                                | 1 |  |
| Cellular Function and Maintenance                     | efflux                | efflux of Na+                                              | 3,19E-03 | SGK1                                                | 1 |  |
| Molecular Transport                                   | efflux                | efflux of Na+                                              | 3,19E-03 | SGK1                                                | 1 |  |
| Cellular Assembly and Organization                    | formation             | formation of endocytotic vesicle                           | 3,19E-03 | C3                                                  | 1 |  |
| Cellular Function and Maintenance                     | formation             | formation of endocytotic vesicle                           | 3,19E-03 | C3                                                  | 1 |  |
| Hematological System Development and Function         | generation            | generation of germinal center B lymphocytes                | 3,19E-03 | C3                                                  | 1 |  |
| Cellular Growth and Proliferation                     | generation            | generation of germinal center B lymphocytes                | 3,19E-03 | C3                                                  | 1 |  |
| Tissue Development                                    | generation            | generation of germinal center B lymphocytes                | 3,19E-03 | C3                                                  | 1 |  |
| Humoral Immune Response                               | generation            | generation of germinal center B lymphocytes                | 3,19E-03 | C3                                                  | 1 |  |
| Metabolic Disease                                     | hyperkalemia          | hyperkalemia                                               | 3,19E-03 | SGK1                                                | 1 |  |
| Developmental Disorder                                | hypertrophy           | hypertrophy of lymph node                                  | 3,19E-03 | C3                                                  | 1 |  |
| Immunological Disease                                 | hypertrophy           | hypertrophy of lymph node                                  | 3,19E-03 | C3                                                  | 1 |  |
| Cellular Assembly and Organization                    | induction             | induction of actin stress fibers                           | 3,19E-03 | CTGF                                                | 1 |  |
| Infectious Disease                                    | infection             | infection by Murine herpesvirus 4                          | 3,19E-03 | C3                                                  | 1 |  |
| Cellular Compromise                                   | injury                | injury of podocytes                                        | 3,19E-03 | C3                                                  | 1 |  |
| Renal and Urological Disease                          | injury                | injury of podocytes                                        | 3,19E-03 | C3                                                  | 1 |  |
| Organismal Injury and Abnormalities                   | injury                | injury of podocytes                                        | 3,19E-03 | C3                                                  | 1 |  |
| Inflammatory Response                                 | phagocytosis          | phagocytosis by dendritic cells                            | 3,19E-03 | C3                                                  | 1 |  |
| Cell-To-Cell Signaling and Interaction                | phagocytosis          | phagocytosis by dendritic cells                            | 3,19E-03 | C3                                                  | 1 |  |
| Cellular Function and Maintenance                     | phagocytosis          | phagocytosis by dendritic cells                            | 3,19E-03 | C3                                                  | 1 |  |
| Antigen Presentation                                  | phagocytosis          | phagocytosis by dendritic cells                            | 3,19E-03 | C3                                                  | 1 |  |
| Cellular Development                                  | differentiation       | differentiation of tumor cell lines                        | 3,41E-03 | CTGF,CYR61,EGR1                                     | 3 |  |
| Cellular Assembly and Organization                    | formation             | formation of lamellipodia                                  | 3,45E-03 | CTGF,CYR61                                          | 2 |  |
| Cell Morphology                                       | formation             | formation of lamellipodia                                  | 3,45E-03 | CTGF,CYR61                                          | 2 |  |
| Cellular Function and Maintenance                     | formation             | formation of lamellipodia                                  | 3,45E-03 | CTGF,CYR61                                          | 2 |  |
| Organismal Functions                                  | energy expenditure    | energy expenditure                                         | 3,69E-03 | C3,Mup1 (includes others)                           | 2 |  |
| Neurological Disease                                  | neuromuscular disease | neuromuscular disease                                      | 3,81E-03 | C3,CTGF,EGR1,ISG15,SGK1                             | 5 |  |
| Skeletal and Muscular Disorders                       | neuromuscular disease | neuromuscular disease                                      | 3,81E-03 | C3,CTGF,EGR1,ISG15,SGK1                             | 5 |  |
| Cancer                                                | carcinoma             | carcinoma                                                  | 3,93E-03 | C3,CLDN5,CLEC10A,CTGF,CYR61,EGR1,IFI27L2,ISG15,SGK1 | 9 |  |
| Cellular Assembly and Organization                    | formation             | formation of filopodia                                     | 4,04E-03 | CTGF,CYR61                                          | 2 |  |
| Cell Morphology                                       | formation             | formation of filopodia                                     | 4,04E-03 | CTGF,CYR61                                          | 2 |  |
| Cellular Function and Maintenance                     | formation             | formation of filopodia                                     | 4,04E-03 | CTGF,CYR61                                          | 2 |  |
| Cancer                                                | non-Hodgkin's disease | non-Hodgkin's disease                                      | 4,18E-03 | CYR61,EGR1,SGK1                                     | 3 |  |
| Hematological Disease                                 | non-Hodgkin's disease | non-Hodgkin's disease                                      | 4,18E-03 | CYR61,EGR1,SGK1                                     | 3 |  |
| Cell-To-Cell Signaling and Interaction                | attachment            | attachment of brain cancer cell lines                      | 4,26E-03 | EGR1                                                | 1 |  |
| Tissue Development                                    | attachment            | attachment of brain cancer cell lines                      | 4,26E-03 | EGR1                                                | 1 |  |
| Cell-To-Cell Signaling and Interaction                | binding               | binding of skin cell lines                                 | 4,26E-03 | CYR61                                               | 1 |  |
| Hair and Skin Development and Function                | binding               | binding of skin cell lines                                 | 4,26E-03 | CYR61                                               | 1 |  |
| Cell Death                                            | cell death            | cell death of bone marrow stromal cells                    | 4,26E-03 | EGR1                                                | 1 |  |
| Cellular Compromise                                   | injury                | injury of hepatocytes                                      | 4,26E-03 | EGR1                                                | 1 |  |
| Gastrointestinal Disease                              | injury                | injury of hepatocytes                                      | 4,26E-03 | EGR1                                                | 1 |  |
| Hepatic System Disease                                | injury                | injury of hepatocytes                                      | 4,26E-03 | EGR1                                                | 1 |  |
| Organismal Injury and Abnormalities                   | injury                | injury of hepatocytes                                      | 4,26E-03 | EGR1                                                | 1 |  |
| Cellular Movement                                     | migration             | migration of sarcoma cell lines                            | 4,26E-03 | EGR1                                                | 1 |  |
| Cellular Development                                  | differentiation       | onset of differentiation of keratinocyte cancer cell lines | 4,26E-03 | CYR61                                               | 1 |  |
| Tissue Morphology                                     | quantity              | quantity of myeloma cell lines                             | 4,26E-03 | SGK1                                                | 1 |  |
| Cancer                                                | tumorigenesis         | tumorigenesis of stomach cancer cell lines                 | 4,26E-03 | CYR61                                               | 1 |  |
| Connective Tissue Development and Function            | quantity              | quantity of osteoclasts                                    | 4,77E-03 | C3,EGR1                                             | 2 |  |
| Tissue Morphology                                     | quantity              | quantity of osteoclasts                                    | 4,77E-03 | C3,EGR1                                             | 2 |  |
| Dermatological Diseases and Conditions                | psoriasis             | psoriasis                                                  | 4,88E-03 | C3,EGR1,ISG15,SGK1                                  | 4 |  |
| Hematological System Development and Function         | expansion             | expansion of T lymphocytes                                 | 5,25E-03 | C3,EGR1                                             | 2 |  |
| Cellular Growth and Proliferation                     | expansion             | expansion of T lymphocytes                                 | 5,25E-03 | C3,EGR1                                             | 2 |  |
| Cellular Development                                  | expansion             | expansion of T lymphocytes                                 | 5,25E-03 | C3,EGR1                                             | 2 |  |
| Skeletal and Muscular System Development and Function | abnormal morphology   | abnormal morphology of appendicular skeleton               | 5,32E-03 | CTGF                                                | 1 |  |
| Cell Death                                            | apoptosis             | apoptosis of mesangial cells                               | 5,32E-03 | CTGF                                                | 1 |  |
| Infectious Disease                                    | replication           | replication of Vaccinia virus WR                           | 5,32E-03 | ISG15                                               | 1 |  |
| Cancer                                                | tumorigenesis         | tumorigenesis of leukemia cell lines                       | 5,32E-03 | EGR1                                                | 1 |  |
| Hematological Disease                                 | tumorigenesis         | tumorigenesis of leukemia cell lines                       | 5,32E-03 | EGR1                                                | 1 |  |
| Hematological System Development and Function         | quantity              | quantity of blood platelets                                | 6,07E-03 | CLEC10A,EGR1                                        | 2 |  |
| Inflammatory Response                                 | quantity              | quantity of blood platelets                                | 6,07E-03 | CLEC10A,EGR1                                        | 2 |  |

|                                                       |                                   |                                                |          |  |                        |  |   |
|-------------------------------------------------------|-----------------------------------|------------------------------------------------|----------|--|------------------------|--|---|
| Tissue Morphology                                     |                                   |                                                |          |  |                        |  |   |
| Inflammatory Response                                 | inflammation                      | inflammation of liver                          | 6,07E-03 |  | CLEC10A,EGR1           |  | 2 |
| Digestive System Development and Function             | inflammation                      | inflammation of liver                          | 6,18E-03 |  | C3,EGR1                |  | 2 |
| Hepatic System Development and Function               | inflammation                      | inflammation of liver                          | 6,18E-03 |  | C3,EGR1                |  | 2 |
| Organ Development                                     | inflammation                      | inflammation of liver                          | 6,18E-03 |  | C3,EGR1                |  | 2 |
| Cell Death                                            | apoptosis                         | apoptosis of endometrial cancer cell lines     | 6,38E-03 |  | CYR61                  |  | 1 |
| Cellular Development                                  | maturation                        | maturation of plasmacytoid dendritic cells     | 6,38E-03 |  | EGR1                   |  | 1 |
| Hematopoiesis                                         | maturation                        | maturation of plasmacytoid dendritic cells     | 6,38E-03 |  | EGR1                   |  | 1 |
| Cardiovascular System Development and Function        | morphogenesis                     | morphogenesis of atrioventricular valve        | 6,38E-03 |  | CYR61                  |  | 1 |
| Embryonic Development                                 | morphogenesis                     | morphogenesis of atrioventricular valve        | 6,38E-03 |  | CYR61                  |  | 1 |
| Organ Development                                     | morphogenesis                     | morphogenesis of atrioventricular valve        | 6,38E-03 |  | CYR61                  |  | 1 |
| Organismal Development                                | morphogenesis                     | morphogenesis of atrioventricular valve        | 6,38E-03 |  | CYR61                  |  | 1 |
| Tissue Development                                    | morphogenesis                     | morphogenesis of atrioventricular valve        | 6,38E-03 |  | CYR61                  |  | 1 |
| Cellular Compromise                                   | perturbation                      | perturbation of cells                          | 6,38E-03 |  | CLDN5                  |  | 1 |
| Neurological Disease                                  | Huntington's disease              | Huntington's disease                           | 6,50E-03 |  | C3,CTGF,EGR1,SGK1      |  | 4 |
| Skeletal and Muscular Disorders                       | Huntington's disease              | Huntington's disease                           | 6,50E-03 |  | C3,CTGF,EGR1,SGK1      |  | 4 |
| Hereditary Disorder                                   | Huntington's disease              | Huntington's disease                           | 6,50E-03 |  | C3,CTGF,EGR1,SGK1      |  | 4 |
| Connective Tissue Development and Function            | development                       | cartilage development                          | 6,51E-03 |  | CTGF,CYR61             |  | 2 |
| Skeletal and Muscular System Development and Function | development                       | cartilage development                          | 6,51E-03 |  | CTGF,CYR61             |  | 2 |
| Tissue Development                                    | development                       | cartilage development                          | 6,51E-03 |  | CTGF,CYR61             |  | 2 |
| Organismal Survival                                   | mortality                         | mortality                                      | 6,51E-03 |  | C3,ISG15               |  | 2 |
| Cellular Growth and Proliferation                     | proliferation                     | proliferation of brain cancer cell lines       | 7,18E-03 |  | CYR61,EGR1             |  | 2 |
| Cellular Development                                  | proliferation                     | proliferation of brain cancer cell lines       | 7,18E-03 |  | CYR61,EGR1             |  | 2 |
| Tissue Morphology                                     | size                              | size of infarct                                | 7,18E-03 |  | C3,EGR1                |  | 2 |
| Cardiovascular Disease                                | size                              | size of infarct                                | 7,18E-03 |  | C3,EGR1                |  | 2 |
| Embryonic Development                                 | development                       | development of ovary                           | 7,41E-03 |  | CTGF,EGR1              |  | 2 |
| Organ Development                                     | development                       | development of ovary                           | 7,41E-03 |  | CTGF,EGR1              |  | 2 |
| Organismal Development                                | development                       | development of ovary                           | 7,41E-03 |  | CTGF,EGR1              |  | 2 |
| Tissue Development                                    | development                       | development of ovary                           | 7,41E-03 |  | CTGF,EGR1              |  | 2 |
| Reproductive System Development and Function          | development                       | development of ovary                           | 7,41E-03 |  | CTGF,EGR1              |  | 2 |
| Renal and Urological System Development and Function  | development                       | development of ovary                           | 7,41E-03 |  | CTGF,EGR1              |  | 2 |
| Infectious Disease                                    | infection                         | Pneumococcal infection                         | 7,44E-03 |  | C3                     |  | 1 |
| Respiratory System Development and Function           | abnormal morphology               | abnormal morphology of conducting airway       | 7,44E-03 |  | CTGF                   |  | 1 |
| Cell-To-Cell Signaling and Interaction                | adhesion                          | adhesion of stomach cancer cell lines          | 7,44E-03 |  | CYR61                  |  | 1 |
| Tissue Development                                    | adhesion                          | adhesion of stomach cancer cell lines          | 7,44E-03 |  | CYR61                  |  | 1 |
| Cell Death                                            | apoptosis                         | apoptosis of acinar gland cells                | 7,44E-03 |  | C3                     |  | 1 |
| Cellular Growth and Proliferation                     | cytostasis                        | cytostasis of carcinoma cell lines             | 7,44E-03 |  | CYR61                  |  | 1 |
| Cardiovascular Disease                                | diastolic heart failure           | diastolic heart failure                        | 7,44E-03 |  | CTGF                   |  | 1 |
| Cellular Development                                  | differentiation                   | differentiation of rhabdomyosarcoma cell lines | 7,44E-03 |  | CTGF                   |  | 1 |
| Cardiovascular System Development and Function        | morphogenesis                     | morphogenesis of atrial septum                 | 7,44E-03 |  | CYR61                  |  | 1 |
| Embryonic Development                                 | morphogenesis                     | morphogenesis of atrial septum                 | 7,44E-03 |  | CYR61                  |  | 1 |
| Organ Development                                     | morphogenesis                     | morphogenesis of atrial septum                 | 7,44E-03 |  | CYR61                  |  | 1 |
| Organismal Development                                | morphogenesis                     | morphogenesis of atrial septum                 | 7,44E-03 |  | CYR61                  |  | 1 |
| Tissue Development                                    | morphogenesis                     | morphogenesis of atrial septum                 | 7,44E-03 |  | CYR61                  |  | 1 |
| Renal and Urological Disease                          | tubulo-interstitial fibrosis      | tubulo-interstitial fibrosis of kidney         | 7,44E-03 |  | C3                     |  | 1 |
| Organismal Injury and Abnormalities                   | tubulo-interstitial fibrosis      | tubulo-interstitial fibrosis of kidney         | 7,44E-03 |  | C3                     |  | 1 |
| Gastrointestinal Disease                              | damage                            | damage of liver                                | 7,76E-03 |  | C3,EGR1                |  | 2 |
| Hepatic System Disease                                | damage                            | damage of liver                                | 7,76E-03 |  | C3,EGR1                |  | 2 |
| Organismal Injury and Abnormalities                   | damage                            | damage of liver                                | 7,76E-03 |  | C3,EGR1                |  | 2 |
| Cell Death                                            | apoptosis                         | apoptosis of gonadal cells                     | 8,49E-03 |  | CTGF,EGR1              |  | 2 |
| Skeletal and Muscular Disorders                       | K/BxN serum transfer arthritis    | K/BxN serum transfer arthritis                 | 8,50E-03 |  | C3                     |  | 1 |
| Connective Tissue Disorders                           | K/BxN serum transfer arthritis    | K/BxN serum transfer arthritis                 | 8,50E-03 |  | C3                     |  | 1 |
| Inflammatory Disease                                  | K/BxN serum transfer arthritis    | K/BxN serum transfer arthritis                 | 8,50E-03 |  | C3                     |  | 1 |
| Inflammatory Response                                 | alternative complement pathway    | alternative complement pathway                 | 8,50E-03 |  | C3                     |  | 1 |
| Antigen Presentation                                  | alternative complement pathway    | alternative complement pathway                 | 8,50E-03 |  | C3                     |  | 1 |
| Humoral Immune Response                               | alternative complement pathway    | alternative complement pathway                 | 8,50E-03 |  | C3                     |  | 1 |
| Ophthalmic Disease                                    | choroidal neovascularization      | choroidal neovascularization of eye            | 8,50E-03 |  | C3                     |  | 1 |
| Hematological System Development and Function         | differentiation                   | differentiation of B-1 lymphocytes             | 8,50E-03 |  | EGR1                   |  | 1 |
| Cellular Development                                  | differentiation                   | differentiation of B-1 lymphocytes             | 8,50E-03 |  | EGR1                   |  | 1 |
| Hematopoiesis                                         | differentiation                   | differentiation of B-1 lymphocytes             | 8,50E-03 |  | EGR1                   |  | 1 |
| Humoral Immune Response                               | differentiation                   | differentiation of B-1 lymphocytes             | 8,50E-03 |  | EGR1                   |  | 1 |
| Cellular Function and Maintenance                     | function                          | function of chondrocytes                       | 8,50E-03 |  | CTGF                   |  | 1 |
| Cellular Assembly and Organization                    | morphogenesis                     | morphogenesis of mitochondria                  | 8,50E-03 |  | Mup1 (includes others) |  | 1 |
| Cellular Function and Maintenance                     | reabsorption                      | reabsorption of Na+                            | 8,50E-03 |  | SGK1                   |  | 1 |
| Molecular Transport                                   | reabsorption                      | reabsorption of Na+                            | 8,50E-03 |  | SGK1                   |  | 1 |
| Infectious Disease                                    | scrapie                           | scrapie                                        | 8,50E-03 |  | C3                     |  | 1 |
| Neurological Disease                                  | scrapie                           | scrapie                                        | 8,50E-03 |  | C3                     |  | 1 |
| Cancer                                                | tumorigenesis                     | tumorigenesis of cells                         | 8,57E-03 |  | C3,CYR61,EGR1          |  | 3 |
| Cancer                                                | T-cell non-Hodgkin's disease      | T-cell non-Hodgkin's disease                   | 8,74E-03 |  | CYR61,EGR1             |  | 2 |
| Hematological Disease                                 | T-cell non-Hodgkin's disease      | T-cell non-Hodgkin's disease                   | 8,74E-03 |  | CYR61,EGR1             |  | 2 |
| Cellular Growth and Proliferation                     | proliferation                     | proliferation of epithelial cell lines         | 9,38E-03 |  | CYR61,EGR1             |  | 2 |
| Cellular Development                                  | proliferation                     | proliferation of epithelial cell lines         | 9,38E-03 |  | CYR61,EGR1             |  | 2 |
| Hair and Skin Development and Function                | proliferation                     | proliferation of epithelial cell lines         | 9,38E-03 |  | CYR61,EGR1             |  | 2 |
| Tissue Morphology                                     | abnormal morphology               | abnormal morphology of nasal capsule           | 9,55E-03 |  | CTGF                   |  | 1 |
| Cell Death                                            | cytolysis                         | cytolysis of leukemia cell lines               | 9,55E-03 |  | ISG15                  |  | 1 |
| Cell Death                                            | cytolysis                         | cytolysis of lymphoma cell lines               | 9,55E-03 |  | ISG15                  |  | 1 |
| Cancer                                                | development                       | development of T-cell non-Hodgkin lymphoma     | 9,55E-03 |  | EGR1                   |  | 1 |
| Immunological Disease                                 | development                       | development of T-cell non-Hodgkin lymphoma     | 9,55E-03 |  | EGR1                   |  | 1 |
| Immunological Disease                                 | hypersensitivity reaction type II | hypersensitivity reaction type II              | 9,55E-03 |  | C3                     |  | 1 |
| Antimicrobial Response                                | immune protection                 | immune protection of organism                  | 9,55E-03 |  | C3                     |  | 1 |
| Cellular Movement                                     | migration                         | migration of bone marrow cell lines            | 9,55E-03 |  | EGR1                   |  | 1 |
| Inflammatory Response                                 | pulmonary interstitial fibrosis   | pulmonary interstitial fibrosis                | 9,55E-03 |  | EGR1                   |  | 1 |
| Organismal Injury and Abnormalities                   | pulmonary interstitial fibrosis   | pulmonary interstitial fibrosis                | 9,55E-03 |  | EGR1                   |  | 1 |
| Connective Tissue Disorders                           | pulmonary interstitial fibrosis   | pulmonary interstitial fibrosis                | 9,55E-03 |  | EGR1                   |  | 1 |
| Inflammatory Disease                                  | pulmonary interstitial fibrosis   | pulmonary interstitial fibrosis                | 9,55E-03 |  | EGR1                   |  | 1 |
| Respiratory Disease                                   | pulmonary interstitial fibrosis   | pulmonary interstitial fibrosis                | 9,55E-03 |  | EGR1                   |  | 1 |
| Connective Tissue Development and Function            | ossification                      | ossification of bone                           | 1,02E-02 |  | CTGF,ISG15             |  | 2 |
| Embryonic Development                                 | ossification                      | ossification of bone                           | 1,02E-02 |  | CTGF,ISG15             |  | 2 |
| Organ Development                                     | ossification                      | ossification of bone                           | 1,02E-02 |  | CTGF,ISG15             |  | 2 |

|                                                       |                                  |                                                  |          |                           |   |
|-------------------------------------------------------|----------------------------------|--------------------------------------------------|----------|---------------------------|---|
| Organismal Development                                |                                  |                                                  |          |                           |   |
| Skeletal and Muscular System Development and Function | ossification                     | ossification of bone                             | 1,02E-02 | CTGF,ISG15                | 2 |
| Tissue Development                                    | ossification                     | ossification of bone                             | 1,02E-02 | CTGF,ISG15                | 2 |
| Connective Tissue Development and Function            | bone mineral density             | bone mineral density                             | 1,06E-02 | CTGF,ISG15                | 2 |
| Skeletal and Muscular System Development and Function | bone mineral density             | bone mineral density                             | 1,06E-02 | CTGF,EGR1                 | 2 |
| Organismal Development                                | abnormal morphology              | abnormal morphology of thoracic cavity           | 1,06E-02 | CTGF                      | 1 |
| Cardiovascular System Development and Function        | adhesion                         | adhesion of endothelial tissue                   | 1,06E-02 | C3                        | 1 |
| Tissue Development                                    | adhesion                         | adhesion of endothelial tissue                   | 1,06E-02 | C3                        | 1 |
| Embryonic Development                                 | fusion                           | fusion of allantois                              | 1,06E-02 | CYR61                     | 1 |
| Organismal Development                                | fusion                           | fusion of allantois                              | 1,06E-02 | CYR61                     | 1 |
| Tissue Morphology                                     | fusion                           | fusion of allantois                              | 1,06E-02 | CYR61                     | 1 |
| Embryonic Development                                 | fusion                           | fusion of chorion                                | 1,06E-02 | CYR61                     | 1 |
| Organismal Development                                | fusion                           | fusion of chorion                                | 1,06E-02 | CYR61                     | 1 |
| Tissue Morphology                                     | fusion                           | fusion of chorion                                | 1,06E-02 | CYR61                     | 1 |
| Inflammatory Response                                 | inflammatory response            | inflammatory response of lung                    | 1,06E-02 | ISG15                     | 1 |
| Neurological Disease                                  | loss                             | loss of axons                                    | 1,06E-02 | C3                        | 1 |
| Renal and Urological Disease                          | acute kidney injury              | acute kidney injury                              | 1,17E-02 | CYR61                     | 1 |
| Cellular Movement                                     | chemotaxis                       | chemotaxis of macrophage cancer cell lines       | 1,17E-02 | C3                        | 1 |
| Embryonic Development                                 | development                      | development of adenohypophysis                   | 1,17E-02 | EGR1                      | 1 |
| Nervous System Development and Function               | development                      | development of adenohypophysis                   | 1,17E-02 | EGR1                      | 1 |
| Organ Development                                     | development                      | development of adenohypophysis                   | 1,17E-02 | EGR1                      | 1 |
| Organismal Development                                | development                      | development of adenohypophysis                   | 1,17E-02 | EGR1                      | 1 |
| Tissue Development                                    | development                      | development of adenohypophysis                   | 1,17E-02 | EGR1                      | 1 |
| Reproductive System Development and Function          | development                      | development of adenohypophysis                   | 1,17E-02 | EGR1                      | 1 |
| Endocrine System Development and Function             | development                      | development of adenohypophysis                   | 1,17E-02 | EGR1                      | 1 |
| Organismal Functions                                  | healing                          | healing of bone                                  | 1,17E-02 | CYR61                     | 1 |
| Lipid Metabolism                                      | incorporation                    | incorporation of oleic acid                      | 1,17E-02 | C3                        | 1 |
| Small Molecule Biochemistry                           | incorporation                    | incorporation of oleic acid                      | 1,17E-02 | C3                        | 1 |
| Cellular Movement                                     | migration                        | migration of mesangial cells                     | 1,17E-02 | CTGF                      | 1 |
| Renal and Urological System Development and Function  | migration                        | migration of mesangial cells                     | 1,17E-02 | CTGF                      | 1 |
| Lipid Metabolism                                      | clearance                        | clearance of triacylglycerol                     | 1,27E-02 | C3                        | 1 |
| Molecular Transport                                   | clearance                        | clearance of triacylglycerol                     | 1,27E-02 | C3                        | 1 |
| Small Molecule Biochemistry                           | clearance                        | clearance of triacylglycerol                     | 1,27E-02 | C3                        | 1 |
| Cellular Growth and Proliferation                     | cytostasis                       | cytostasis of lung cancer cell lines             | 1,27E-02 | CYR61                     | 1 |
| Cellular Function and Maintenance                     | homeostasis                      | homeostasis of D-glucose                         | 1,33E-02 | C3,Mup1 (includes others) | 2 |
| Small Molecule Biochemistry                           | homeostasis                      | homeostasis of D-glucose                         | 1,33E-02 | C3,Mup1 (includes others) | 2 |
| Carbohydrate Metabolism                               | homeostasis                      | homeostasis of D-glucose                         | 1,33E-02 | C3,Mup1 (includes others) | 2 |
| Neurological Disease                                  | multiple sclerosis               | multiple sclerosis                               | 1,36E-02 | EGR1,ISG15                | 2 |
| Skeletal and Muscular Disorders                       | multiple sclerosis               | multiple sclerosis                               | 1,36E-02 | EGR1,ISG15                | 2 |
| Inflammatory Disease                                  | multiple sclerosis               | multiple sclerosis                               | 1,36E-02 | EGR1,ISG15                | 2 |
| Organ Morphology                                      | abnormal morphology              | abnormal morphology of anterior chamber of eye   | 1,38E-02 | EGR1                      | 1 |
| Embryonic Development                                 | abnormal morphology              | abnormal morphology of anterior chamber of eye   | 1,38E-02 | EGR1                      | 1 |
| Organ Development                                     | abnormal morphology              | abnormal morphology of anterior chamber of eye   | 1,38E-02 | EGR1                      | 1 |
| Organismal Development                                | abnormal morphology              | abnormal morphology of anterior chamber of eye   | 1,38E-02 | EGR1                      | 1 |
| Tissue Development                                    | abnormal morphology              | abnormal morphology of anterior chamber of eye   | 1,38E-02 | EGR1                      | 1 |
| Visual System Development and Function                | abnormal morphology              | abnormal morphology of anterior chamber of eye   | 1,38E-02 | EGR1                      | 1 |
| Inflammatory Disease                                  | allergic asthma                  | allergic asthma                                  | 1,38E-02 | C3                        | 1 |
| Respiratory Disease                                   | allergic asthma                  | allergic asthma                                  | 1,38E-02 | C3                        | 1 |
| Immunological Disease                                 | autoimmune hemolytic anemia      | autoimmune hemolytic anemia                      | 1,38E-02 | C3                        | 1 |
| Hematological Disease                                 | autoimmune hemolytic anemia      | autoimmune hemolytic anemia                      | 1,38E-02 | C3                        | 1 |
| Nervous System Development and Function               | long-term recognition memory     | long-term recognition memory                     | 1,38E-02 | EGR1                      | 1 |
| Behavior                                              | long-term recognition memory     | long-term recognition memory                     | 1,38E-02 | EGR1                      | 1 |
| Organismal Survival                                   | morbidity                        | morbidity                                        | 1,38E-02 | C3                        | 1 |
| Inflammatory Disease                                  | peritonitis                      | peritonitis                                      | 1,38E-02 | C3                        | 1 |
| Cellular Growth and Proliferation                     | proliferation                    | proliferation of rhabdomyosarcoma cell lines     | 1,38E-02 | CTGF                      | 1 |
| Cellular Development                                  | proliferation                    | proliferation of rhabdomyosarcoma cell lines     | 1,38E-02 | CTGF                      | 1 |
| Cardiovascular System Development and Function        | tubulogenesis                    | tubulogenesis of endothelial cells               | 1,38E-02 | CYR61                     | 1 |
| Cellular Development                                  | tubulogenesis                    | tubulogenesis of endothelial cells               | 1,38E-02 | CYR61                     | 1 |
| Embryonic Development                                 | tubulogenesis                    | tubulogenesis of endothelial cells               | 1,38E-02 | CYR61                     | 1 |
| Organismal Development                                | tubulogenesis                    | tubulogenesis of endothelial cells               | 1,38E-02 | CYR61                     | 1 |
| Tissue Development                                    | tubulogenesis                    | tubulogenesis of endothelial cells               | 1,38E-02 | CYR61                     | 1 |
| Cancer                                                | tumorigenesis                    | tumorigenesis of tumor cell lines                | 1,46E-02 | CYR61,EGR1                | 2 |
| Cell Cycle                                            | G1 phase                         | arrest in G1 phase of carcinoma cell lines       | 1,46E-02 | CYR61                     | 1 |
| Cancer                                                | hereditary gingival fibromatosis | hereditary gingival fibromatosis                 | 1,48E-02 | EGR1                      | 1 |
| Gastrointestinal Disease                              | hereditary gingival fibromatosis | hereditary gingival fibromatosis                 | 1,48E-02 | EGR1                      | 1 |
| Skeletal and Muscular Disorders                       | hereditary gingival fibromatosis | hereditary gingival fibromatosis                 | 1,48E-02 | EGR1                      | 1 |
| Hereditary Disorder                                   | hereditary gingival fibromatosis | hereditary gingival fibromatosis                 | 1,48E-02 | EGR1                      | 1 |
| Connective Tissue Disorders                           | hereditary gingival fibromatosis | hereditary gingival fibromatosis                 | 1,48E-02 | EGR1                      | 1 |
| Protein Synthesis                                     | quantity                         | quantity of hemoglobin in blood                  | 1,48E-02 | CLEC10A                   | 1 |
| Digestive System Development and Function             | secretion                        | secretion of saliva                              | 1,48E-02 | C3                        | 1 |
| Organismal Development                                | secretion                        | secretion of saliva                              | 1,48E-02 | C3                        | 1 |
| Cellular Growth and Proliferation                     | proliferation                    | proliferation of cancer cells                    | 1,57E-02 | CYR61,EGR1                | 2 |
| Cellular Development                                  | proliferation                    | proliferation of cancer cells                    | 1,57E-02 | CYR61,EGR1                | 2 |
| Tumor Morphology                                      | proliferation                    | proliferation of cancer cells                    | 1,57E-02 | CYR61,EGR1                | 2 |
| Cell Death                                            | apoptosis                        | apoptosis of granulosa cells                     | 1,59E-02 | CTGF                      | 1 |
| Neurological Disease                                  | demyelination                    | demyelination of spinal cord                     | 1,59E-02 | C3                        | 1 |
| Cell Death                                            | focal necrosis                   | focal necrosis of liver                          | 1,59E-02 | C3                        | 1 |
| Infectious Disease                                    | infection                        | infection of leukocyte cell lines                | 1,59E-02 | C3                        | 1 |
| Cellular Growth and Proliferation                     | proliferation                    | proliferation of microvascular endothelial cells | 1,59E-02 | C3                        | 1 |
| Cardiovascular System Development and Function        | proliferation                    | proliferation of microvascular endothelial cells | 1,59E-02 | C3                        | 1 |
| Cellular Development                                  | proliferation                    | proliferation of microvascular endothelial cells | 1,59E-02 | C3                        | 1 |
| Organismal Development                                | proliferation                    | proliferation of microvascular endothelial cells | 1,59E-02 | C3                        | 1 |
| Tissue Development                                    | proliferation                    | proliferation of microvascular endothelial cells | 1,59E-02 | C3                        | 1 |
| Inflammatory Response                                 | classical complement pathway     | classical complement pathway                     | 1,69E-02 | C3                        | 1 |
| Antigen Presentation                                  | classical complement pathway     | classical complement pathway                     | 1,69E-02 | C3                        | 1 |
| Humoral Immune Response                               | classical complement pathway     | classical complement pathway                     | 1,69E-02 | C3                        | 1 |
| Cellular Growth and Proliferation                     | colony formation                 | colony formation of leukemia cell lines          | 1,69E-02 | EGR1                      | 1 |
| Renal and Urological Disease                          | dysfunction                      | dysfunction of kidney                            | 1,69E-02 | C3                        | 1 |
| Organismal Injury and Abnormalities                   | dysfunction                      | dysfunction of kidney                            | 1,69E-02 | C3                        | 1 |

|                                                       |                            |                                                |          |                         |   |
|-------------------------------------------------------|----------------------------|------------------------------------------------|----------|-------------------------|---|
| Cellular Assembly and Organization                    | formation                  | formation of tight junctions                   | 1.69E-02 | CLDN5                   | 1 |
| Cell-To-Cell Signaling and Interaction                | formation                  | formation of tight junctions                   | 1.69E-02 | CLDN5                   | 1 |
| Tissue Development                                    | formation                  | formation of tight junctions                   | 1.69E-02 | CLDN5                   | 1 |
| Cellular Function and Maintenance                     | formation                  | formation of tight junctions                   | 1.69E-02 | CLDN5                   | 1 |
| Renal and Urological System Development and Function  | glomerular filtration rate | glomerular filtration rate of kidney           | 1.69E-02 | SGK1                    | 1 |
| Cardiovascular System Development and Function        | morphogenesis              | morphogenesis of ventricular septum            | 1.69E-02 | CYR61                   | 1 |
| Embryonic Development                                 | morphogenesis              | morphogenesis of ventricular septum            | 1.69E-02 | CYR61                   | 1 |
| Organ Development                                     | morphogenesis              | morphogenesis of ventricular septum            | 1.69E-02 | CYR61                   | 1 |
| Organismal Development                                | morphogenesis              | morphogenesis of ventricular septum            | 1.69E-02 | CYR61                   | 1 |
| Tissue Development                                    | morphogenesis              | morphogenesis of ventricular septum            | 1.69E-02 | CYR61                   | 1 |
| Cancer                                                | peripheral T-cell lymphoma | peripheral T-cell lymphoma                     | 1.69E-02 | CYR61                   | 1 |
| Hematological Disease                                 | peripheral T-cell lymphoma | peripheral T-cell lymphoma                     | 1.69E-02 | CYR61                   | 1 |
| Cellular Growth and Proliferation                     | proliferation              | proliferation of prostate cell lines           | 1.69E-02 | CYR61                   | 1 |
| Cellular Development                                  | proliferation              | proliferation of prostate cell lines           | 1.69E-02 | CYR61                   | 1 |
| Reproductive System Development and Function          | proliferation              | proliferation of prostate cell lines           | 1.69E-02 | CYR61                   | 1 |
| Infectious Disease                                    | release                    | release of HIV-1                               | 1.69E-02 | ISG15                   | 1 |
| Cell Morphology                                       | abnormal morphology        | abnormal morphology of Leydig cells            | 1.80E-02 | EGR1                    | 1 |
| Organ Morphology                                      | abnormal morphology        | abnormal morphology of Leydig cells            | 1.80E-02 | EGR1                    | 1 |
| Tissue Morphology                                     | abnormal morphology        | abnormal morphology of Leydig cells            | 1.80E-02 | EGR1                    | 1 |
| Reproductive System Development and Function          | abnormal morphology        | abnormal morphology of Leydig cells            | 1.80E-02 | EGR1                    | 1 |
| Organ Morphology                                      | abnormal morphology        | abnormal morphology of fibula                  | 1.80E-02 | CTGF                    | 1 |
| Connective Tissue Development and Function            | abnormal morphology        | abnormal morphology of fibula                  | 1.80E-02 | CTGF                    | 1 |
| Embryonic Development                                 | abnormal morphology        | abnormal morphology of fibula                  | 1.80E-02 | CTGF                    | 1 |
| Organ Development                                     | abnormal morphology        | abnormal morphology of fibula                  | 1.80E-02 | CTGF                    | 1 |
| Organismal Development                                | abnormal morphology        | abnormal morphology of fibula                  | 1.80E-02 | CTGF                    | 1 |
| Skeletal and Muscular System Development and Function | abnormal morphology        | abnormal morphology of fibula                  | 1.80E-02 | CTGF                    | 1 |
| Tissue Development                                    | abnormal morphology        | abnormal morphology of fibula                  | 1.80E-02 | CTGF                    | 1 |
| Hematological System Development and Function         | accumulation               | accumulation of eosinophils                    | 1.80E-02 | EGR1                    | 1 |
| Inflammatory Response                                 | accumulation               | accumulation of eosinophils                    | 1.80E-02 | EGR1                    | 1 |
| Tissue Development                                    | accumulation               | accumulation of eosinophils                    | 1.80E-02 | EGR1                    | 1 |
| Immune Cell Trafficking                               | accumulation               | accumulation of eosinophils                    | 1.80E-02 | EGR1                    | 1 |
| Hypersensitivity Response                             | accumulation               | accumulation of eosinophils                    | 1.80E-02 | EGR1                    | 1 |
| Infectious Disease                                    | growth                     | growth of virus                                | 1.80E-02 | ISG15                   | 1 |
| Organismal Development                                | growth                     | growth of virus                                | 1.80E-02 | ISG15                   | 1 |
| Hematological System Development and Function         | migration                  | migration of Langerhans cells                  | 1.80E-02 | C3                      | 1 |
| Inflammatory Response                                 | migration                  | migration of Langerhans cells                  | 1.80E-02 | C3                      | 1 |
| Cellular Movement                                     | migration                  | migration of Langerhans cells                  | 1.80E-02 | C3                      | 1 |
| Immune Cell Trafficking                               | migration                  | migration of Langerhans cells                  | 1.80E-02 | C3                      | 1 |
| Antigen Presentation                                  | migration                  | migration of Langerhans cells                  | 1.80E-02 | C3                      | 1 |
| Cellular Growth and Proliferation                     | proliferation              | proliferation of fibrosarcoma cell lines       | 1.80E-02 | EGR1                    | 1 |
| Cellular Development                                  | proliferation              | proliferation of fibrosarcoma cell lines       | 1.80E-02 | EGR1                    | 1 |
| Connective Tissue Development and Function            | quantity                   | quantity of fibroblasts                        | 1.80E-02 | CTGF                    | 1 |
| Tissue Morphology                                     | quantity                   | quantity of fibroblasts                        | 1.80E-02 | CTGF                    | 1 |
| Organ Morphology                                      | size                       | size of eye                                    | 1.80E-02 | EGR1                    | 1 |
| Embryonic Development                                 | size                       | size of eye                                    | 1.80E-02 | EGR1                    | 1 |
| Organ Development                                     | size                       | size of eye                                    | 1.80E-02 | EGR1                    | 1 |
| Organismal Development                                | size                       | size of eye                                    | 1.80E-02 | EGR1                    | 1 |
| Tissue Development                                    | size                       | size of eye                                    | 1.80E-02 | EGR1                    | 1 |
| Visual System Development and Function                | size                       | size of eye                                    | 1.80E-02 | EGR1                    | 1 |
| Hematological System Development and Function         | chemotaxis                 | chemotaxis of mast cells                       | 1.90E-02 | C3                      | 1 |
| Inflammatory Response                                 | chemotaxis                 | chemotaxis of mast cells                       | 1.90E-02 | C3                      | 1 |
| Cellular Movement                                     | chemotaxis                 | chemotaxis of mast cells                       | 1.90E-02 | C3                      | 1 |
| Immune Cell Trafficking                               | chemotaxis                 | chemotaxis of mast cells                       | 1.90E-02 | C3                      | 1 |
| Antigen Presentation                                  | chemotaxis                 | chemotaxis of mast cells                       | 1.90E-02 | C3                      | 1 |
| Hypersensitivity Response                             | chemotaxis                 | chemotaxis of mast cells                       | 1.90E-02 | C3                      | 1 |
| Cancer                                                | prostate cancer            | prostate cancer                                | 1.94E-02 | C3,ISG15,SGK1           | 3 |
| Reproductive System Disease                           | prostate cancer            | prostate cancer                                | 1.94E-02 | C3,ISG15,SGK1           | 3 |
| Hereditary Disorder                                   | prostate cancer            | prostate cancer                                | 1.94E-02 | C3,ISG15,SGK1           | 3 |
| Organ Morphology                                      | abnormal morphology        | abnormal morphology of atlas                   | 2.01E-02 | CTGF                    | 1 |
| Connective Tissue Development and Function            | abnormal morphology        | abnormal morphology of atlas                   | 2.01E-02 | CTGF                    | 1 |
| Embryonic Development                                 | abnormal morphology        | abnormal morphology of atlas                   | 2.01E-02 | CTGF                    | 1 |
| Nervous System Development and Function               | abnormal morphology        | abnormal morphology of atlas                   | 2.01E-02 | CTGF                    | 1 |
| Organ Development                                     | abnormal morphology        | abnormal morphology of atlas                   | 2.01E-02 | CTGF                    | 1 |
| Organismal Development                                | abnormal morphology        | abnormal morphology of atlas                   | 2.01E-02 | CTGF                    | 1 |
| Skeletal and Muscular System Development and Function | abnormal morphology        | abnormal morphology of atlas                   | 2.01E-02 | CTGF                    | 1 |
| Tissue Development                                    | abnormal morphology        | abnormal morphology of atlas                   | 2.01E-02 | CTGF                    | 1 |
| Inflammatory Response                                 | phagocytosis               | phagocytosis of bacteria                       | 2.01E-02 | C3                      | 1 |
| Cell-To-Cell Signaling and Interaction                | phagocytosis               | phagocytosis of bacteria                       | 2.01E-02 | C3                      | 1 |
| Cellular Function and Maintenance                     | phagocytosis               | phagocytosis of bacteria                       | 2.01E-02 | C3                      | 1 |
| Cellular Function and Maintenance                     | flux                       | flux of inorganic cation                       | 2.02E-02 | C3,SGK1                 | 2 |
| Molecular Transport                                   | flux                       | flux of inorganic cation                       | 2.02E-02 | C3,SGK1                 | 2 |
| Organismal Development                                | abnormal morphology        | abnormal morphology of blastocyst              | 2.11E-02 | C3                      | 1 |
| Connective Tissue Development and Function            | condensation               | condensation of cartilage tissue               | 2.11E-02 | CTGF                    | 1 |
| Skeletal and Muscular System Development and Function | condensation               | condensation of cartilage tissue               | 2.11E-02 | CTGF                    | 1 |
| Organismal Injury and Abnormalities                   | formation                  | formation of nodule                            | 2.11E-02 | CTGF                    | 1 |
| Hematological System Development and Function         | function                   | function of microglia                          | 2.11E-02 | EGR1                    | 1 |
| Cellular Function and Maintenance                     | function                   | function of microglia                          | 2.11E-02 | EGR1                    | 1 |
| Antigen Presentation                                  | function                   | function of microglia                          | 2.11E-02 | EGR1                    | 1 |
| Cancer                                                | breast cancer              | breast cancer                                  | 2.15E-02 | CLEC10A,CTGF,CYR61,EGR1 | 4 |
| Reproductive System Disease                           | breast cancer              | breast cancer                                  | 2.15E-02 | CLEC10A,CTGF,CYR61,EGR1 | 4 |
| Cardiovascular System Development and Function        | function                   | function of blood-brain barrier                | 2.22E-02 | CLDN5                   | 1 |
| Nervous System Development and Function               | function                   | function of blood-brain barrier                | 2.22E-02 | CLDN5                   | 1 |
| Organ Development                                     | function                   | function of blood-brain barrier                | 2.22E-02 | CLDN5                   | 1 |
| Connective Tissue Development and Function            | mass                       | mass of white adipose tissue                   | 2.22E-02 | C3                      | 1 |
| Tissue Morphology                                     | mass                       | mass of white adipose tissue                   | 2.22E-02 | C3                      | 1 |
| Cellular Growth and Proliferation                     | proliferation              | proliferation of endometrial cancer cell lines | 2.22E-02 | CYR61                   | 1 |
| Cellular Development                                  | proliferation              | proliferation of endometrial cancer cell lines | 2.22E-02 | CYR61                   | 1 |
| Cellular Growth and Proliferation                     | proliferation              | proliferation of mammary tumor cells           | 2.22E-02 | CYR61                   | 1 |
| Cellular Development                                  | proliferation              | proliferation of mammary tumor cells           | 2.22E-02 | CYR61                   | 1 |

|                                                       |                                        |                                                      |          |               |   |
|-------------------------------------------------------|----------------------------------------|------------------------------------------------------|----------|---------------|---|
| Tumor Morphology                                      | proliferation                          | proliferation of mammary tumor cells                 | 2,22E-02 | CYR61         | 1 |
| Cell-To-Cell Signaling and Interaction                | quantity                               | quantity of histamine                                | 2,22E-02 | C3            | 1 |
| Molecular Transport                                   | quantity                               | quantity of histamine                                | 2,22E-02 | C3            | 1 |
| Small Molecule Biochemistry                           | quantity                               | quantity of histamine                                | 2,22E-02 | C3            | 1 |
| Hematological Disease                                 | Budd-Chiari syndrome                   | Budd-Chiari syndrome                                 | 2,32E-02 | CTGF          | 1 |
| Cardiovascular Disease                                | Budd-Chiari syndrome                   | Budd-Chiari syndrome                                 | 2,32E-02 | CTGF          | 1 |
| Tissue Morphology                                     | abnormal morphology                    | abnormal morphology of mandibular cartilage          | 2,32E-02 | CTGF          | 1 |
| Cell Morphology                                       | abnormal morphology                    | abnormal morphology of type II pneumocytes           | 2,32E-02 | CTGF          | 1 |
| Organ Morphology                                      | abnormal morphology                    | abnormal morphology of type II pneumocytes           | 2,32E-02 | CTGF          | 1 |
| Embryonic Development                                 | abnormal morphology                    | abnormal morphology of type II pneumocytes           | 2,32E-02 | CTGF          | 1 |
| Organ Development                                     | abnormal morphology                    | abnormal morphology of type II pneumocytes           | 2,32E-02 | CTGF          | 1 |
| Organismal Development                                | abnormal morphology                    | abnormal morphology of type II pneumocytes           | 2,32E-02 | CTGF          | 1 |
| Tissue Development                                    | abnormal morphology                    | abnormal morphology of type II pneumocytes           | 2,32E-02 | CTGF          | 1 |
| Respiratory System Development and Function           | abnormal morphology                    | abnormal morphology of type II pneumocytes           | 2,32E-02 | CTGF          | 1 |
| Organ Morphology                                      | abnormal morphology                    | abnormal morphology of vertebral column              | 2,32E-02 | CTGF          | 1 |
| Connective Tissue Development and Function            | abnormal morphology                    | abnormal morphology of vertebral column              | 2,32E-02 | CTGF          | 1 |
| Embryonic Development                                 | abnormal morphology                    | abnormal morphology of vertebral column              | 2,32E-02 | CTGF          | 1 |
| Nervous System Development and Function               | abnormal morphology                    | abnormal morphology of vertebral column              | 2,32E-02 | CTGF          | 1 |
| Organ Development                                     | abnormal morphology                    | abnormal morphology of vertebral column              | 2,32E-02 | CTGF          | 1 |
| Organismal Development                                | abnormal morphology                    | abnormal morphology of vertebral column              | 2,32E-02 | CTGF          | 1 |
| Skeletal and Muscular System Development and Function | abnormal morphology                    | abnormal morphology of vertebral column              | 2,32E-02 | CTGF          | 1 |
| Tissue Development                                    | abnormal morphology                    | abnormal morphology of vertebral column              | 2,32E-02 | CTGF          | 1 |
| Cellular Growth and Proliferation                     | abnormal morphology                    | abnormal morphology of vertebral column              | 2,32E-02 | CTGF          | 1 |
| Cellular Assembly and Organization                    | colony formation                       | colony formation of prostate cancer cell lines       | 2,32E-02 | EGR1          | 1 |
| Cellular Movement                                     | quantity                               | quantity of amyloid fibrils                          | 2,32E-02 | C3            | 1 |
| Hair and Skin Development and Function                | migration                              | migration of skin cell lines                         | 2,42E-02 | CYR61         | 1 |
| Cardiovascular System Development and Function        | migration                              | migration of skin cell lines                         | 2,42E-02 | CYR61         | 1 |
| Cell Cycle                                            | angiogenesis                           | angiogenesis                                         | 2,46E-02 | C3,CTGF,CYR61 | 3 |
| Cell Cycle                                            | G1 phase                               | arrest in G1 phase of lung cancer cell lines         | 2,53E-02 | CYR61         | 1 |
| Organ Morphology                                      | cell cycle progression                 | cell cycle progression of prostate cancer cell lines | 2,53E-02 | EGR1          | 1 |
| Reproductive System Development and Function          | mass                                   | mass of uterus                                       | 2,53E-02 | EGR1          | 1 |
| Connective Tissue Development and Function            | mass                                   | mass of uterus                                       | 2,53E-02 | EGR1          | 1 |
| Skeletal and Muscular System Development and Function | strength                               | strength of bone                                     | 2,53E-02 | ISG15         | 1 |
| Cell-To-Cell Signaling and Interaction                | strength                               | strength of bone                                     | 2,53E-02 | ISG15         | 1 |
| Tissue Development                                    | adhesion                               | adhesion of tumor cell lines                         | 2,53E-02 | CYR61,EGR1    | 2 |
| Cardiovascular System Development and Function        | adhesion                               | adhesion of tumor cell lines                         | 2,53E-02 | CYR61,EGR1    | 2 |
| Cellular Development                                  | development                            | development of vascular endothelial cells            | 2,63E-02 | CYR61         | 1 |
| Organismal Development                                | development                            | development of vascular endothelial cells            | 2,63E-02 | CYR61         | 1 |
| Tissue Development                                    | development                            | development of vascular endothelial cells            | 2,63E-02 | CYR61         | 1 |
| Neurological Disease                                  | relapsing-remitting multiple sclerosis | relapsing-remitting multiple sclerosis               | 2,63E-02 | ISG15         | 1 |
| Skeletal and Muscular Disorders                       | relapsing-remitting multiple sclerosis | relapsing-remitting multiple sclerosis               | 2,63E-02 | ISG15         | 1 |
| Inflammatory Disease                                  | relapsing-remitting multiple sclerosis | relapsing-remitting multiple sclerosis               | 2,63E-02 | ISG15         | 1 |
| Reproductive System Disease                           | relapsing-remitting multiple sclerosis | relapsing-remitting multiple sclerosis               | 2,63E-02 | EGR1          | 1 |
| Embryonic Development                                 | sterility                              | sterility                                            | 2,70E-02 | C3,EGR1       | 2 |
| Lymphoid Tissue Structure and Development             | development                            | development of lymphoid organ                        | 2,70E-02 | C3,EGR1       | 2 |
| Organ Development                                     | development                            | development of lymphoid organ                        | 2,70E-02 | C3,EGR1       | 2 |
| Organismal Development                                | development                            | development of lymphoid organ                        | 2,70E-02 | C3,EGR1       | 2 |
| Tissue Development                                    | development                            | development of lymphoid organ                        | 2,70E-02 | C3,EGR1       | 2 |
| Organ Morphology                                      | abnormal morphology                    | abnormal morphology of radius                        | 2,74E-02 | CTGF          | 1 |
| Connective Tissue Development and Function            | abnormal morphology                    | abnormal morphology of radius                        | 2,74E-02 | CTGF          | 1 |
| Embryonic Development                                 | abnormal morphology                    | abnormal morphology of radius                        | 2,74E-02 | CTGF          | 1 |
| Organ Development                                     | abnormal morphology                    | abnormal morphology of radius                        | 2,74E-02 | CTGF          | 1 |
| Organismal Development                                | abnormal morphology                    | abnormal morphology of radius                        | 2,74E-02 | CTGF          | 1 |
| Skeletal and Muscular System Development and Function | abnormal morphology                    | abnormal morphology of radius                        | 2,74E-02 | CTGF          | 1 |
| Tissue Development                                    | abnormal morphology                    | abnormal morphology of radius                        | 2,74E-02 | CTGF          | 1 |
| Hematological System Development and Function         | activation                             | activation of mast cells                             | 2,74E-02 | C3            | 1 |
| Inflammatory Response                                 | activation                             | activation of mast cells                             | 2,74E-02 | C3            | 1 |
| Cell-To-Cell Signaling and Interaction                | activation                             | activation of mast cells                             | 2,74E-02 | C3            | 1 |
| Immune Cell Trafficking                               | activation                             | activation of mast cells                             | 2,74E-02 | C3            | 1 |
| Antigen Presentation                                  | activation                             | activation of mast cells                             | 2,74E-02 | C3            | 1 |
| Hypersensitivity Response                             | activation                             | activation of mast cells                             | 2,74E-02 | C3            | 1 |
| Hematological System Development and Function         | hematocrit                             | hematocrit of blood                                  | 2,74E-02 | CLEC10A       | 1 |
| Cellular Assembly and Organization                    | organization                           | organization of Golgi apparatus                      | 2,74E-02 | GOLGB1        | 1 |
| Cellular Function and Maintenance                     | organization                           | organization of Golgi apparatus                      | 2,74E-02 | GOLGB1        | 1 |
| Molecular Transport                                   | quantity                               | quantity of K+                                       | 2,74E-02 | SGK1          | 1 |
| Cardiovascular System Development and Function        | development                            | endothelial cell development                         | 2,74E-02 | C3,CYR61      | 2 |
| Cellular Development                                  | development                            | endothelial cell development                         | 2,74E-02 | C3,CYR61      | 2 |
| Organismal Development                                | development                            | endothelial cell development                         | 2,74E-02 | C3,CYR61      | 2 |
| Tissue Development                                    | development                            | endothelial cell development                         | 2,74E-02 | C3,CYR61      | 2 |
| Inflammatory Response                                 | inflammatory response                  | inflammatory response                                | 2,75E-02 | C3,EGR1,ISG15 | 3 |
| Cell Death                                            | apoptosis                              | apoptosis of breast cancer cell lines                | 2,82E-02 | CTGF,CYR61    | 2 |
| Hematological System Development and Function         | development                            | development of macrophages                           | 2,84E-02 | EGR1          | 1 |
| Cellular Development                                  | development                            | development of macrophages                           | 2,84E-02 | EGR1          | 1 |
| Hematopoiesis                                         | development                            | development of macrophages                           | 2,84E-02 | EGR1          | 1 |
| Lymphoid Tissue Structure and Development             | development                            | development of macrophages                           | 2,84E-02 | EGR1          | 1 |
| Organ Morphology                                      | quantity                               | quantity of corpus luteum                            | 2,84E-02 | CTGF          | 1 |
| Reproductive System Development and Function          | quantity                               | quantity of corpus luteum                            | 2,84E-02 | CTGF          | 1 |
| Cellular Growth and Proliferation                     | proliferation                          | proliferation of carcinoma cell lines                | 2,86E-02 | CYR61,EGR1    | 2 |
| Cellular Development                                  | proliferation                          | proliferation of carcinoma cell lines                | 2,86E-02 | CYR61,EGR1    | 2 |
| Cell-To-Cell Signaling and Interaction                | binding                                | binding of fibroblast cell lines                     | 2,94E-02 | CYR61         | 1 |
| Connective Tissue Development and Function            | binding                                | binding of fibroblast cell lines                     | 2,94E-02 | CYR61         | 1 |
| Protein Synthesis                                     | cleavage                               | cleavage of protein fragment                         | 2,94E-02 | C3            | 1 |
| Post-Translational Modification                       | cleavage                               | cleavage of protein fragment                         | 2,94E-02 | C3            | 1 |
| Protein Degradation                                   | cleavage                               | cleavage of protein fragment                         | 2,94E-02 | C3            | 1 |
| Lipid Metabolism                                      | esterification                         | esterification of cholesterol                        | 2,94E-02 | C3            | 1 |
| Small Molecule Biochemistry                           | esterification                         | esterification of cholesterol                        | 2,94E-02 | C3            | 1 |
| Organ Morphology                                      | abnormal morphology                    | abnormal morphology of ulna                          | 3,05E-02 | CTGF          | 1 |
| Connective Tissue Development and Function            | abnormal morphology                    | abnormal morphology of ulna                          | 3,05E-02 | CTGF          | 1 |
| Embryonic Development                                 | abnormal morphology                    | abnormal morphology of ulna                          | 3,05E-02 | CTGF          | 1 |



|                                                       |                                  |                                                                |          |                             |   |
|-------------------------------------------------------|----------------------------------|----------------------------------------------------------------|----------|-----------------------------|---|
| Organ Development                                     | abnormal morphology              | abnormal morphology of ulna                                    | 3,05E-02 | CTGF                        | 1 |
| Organismal Development                                | abnormal morphology              | abnormal morphology of ulna                                    | 3,05E-02 | CTGF                        | 1 |
| Skeletal and Muscular System Development and Function | abnormal morphology              | abnormal morphology of ulna                                    | 3,05E-02 | CTGF                        | 1 |
| Tissue Development                                    | abnormal morphology              | abnormal morphology of ulna                                    | 3,05E-02 | CTGF                        | 1 |
| Cell-To-Cell Signaling and Interaction                | adhesion                         | adhesion of embryonic cell lines                               | 3,05E-02 | C3                          | 1 |
| Embryonic Development                                 | adhesion                         | adhesion of embryonic cell lines                               | 3,05E-02 | C3                          | 1 |
| Tissue Development                                    | adhesion                         | adhesion of embryonic cell lines                               | 3,05E-02 | C3                          | 1 |
| Neurological Disease                                  | age-related macular degeneration | age-related macular degeneration                               | 3,05E-02 | C3                          | 1 |
| Ophthalmic Disease                                    | age-related macular degeneration | age-related macular degeneration                               | 3,05E-02 | C3                          | 1 |
| Infectious Disease                                    | dengue hemorrhagic fever         | dengue hemorrhagic fever                                       | 3,05E-02 | C3                          | 1 |
| Neurological Disease                                  | febrile seizure                  | febrile seizure                                                | 3,05E-02 | PCOLCE2 (includes EG:26577) | 1 |
| Organismal Injury and Abnormalities                   | formation                        | formation of thrombus                                          | 3,05E-02 | C3                          | 1 |
| Cardiovascular Disease                                | formation                        | formation of thrombus                                          | 3,05E-02 | C3                          | 1 |
| Developmental Disorder                                | hypoplasia                       | hypoplasia of lung                                             | 3,05E-02 | CTGF                        | 1 |
| Respiratory Disease                                   | hypoplasia                       | hypoplasia of lung                                             | 3,05E-02 | CTGF                        | 1 |
| Inflammatory Response                                 | inflammation                     | inflammation of brain                                          | 3,05E-02 | C3                          | 1 |
| Connective Tissue Development and Function            | ossification                     | ossification of endochondral bone                              | 3,05E-02 | CTGF                        | 1 |
| Embryonic Development                                 | ossification                     | ossification of endochondral bone                              | 3,05E-02 | CTGF                        | 1 |
| Organ Development                                     | ossification                     | ossification of endochondral bone                              | 3,05E-02 | CTGF                        | 1 |
| Organismal Development                                | ossification                     | ossification of endochondral bone                              | 3,05E-02 | CTGF                        | 1 |
| Skeletal and Muscular System Development and Function | ossification                     | ossification of endochondral bone                              | 3,05E-02 | CTGF                        | 1 |
| Tissue Development                                    | ossification                     | ossification of endochondral bone                              | 3,05E-02 | CTGF                        | 1 |
| Lymphoid Tissue Structure and Development             | size                             | size of germinal center                                        | 3,05E-02 | C3                          | 1 |
| Humoral Immune Response                               | size                             | size of germinal center                                        | 3,05E-02 | C3                          | 1 |
| Small Molecule Biochemistry                           | synthesis                        | synthesis of proteoglycan                                      | 3,05E-02 | CTGF                        | 1 |
| Carbohydrate Metabolism                               | synthesis                        | synthesis of proteoglycan                                      | 3,05E-02 | CTGF                        | 1 |
| Cardiovascular System Development and Function        | vasculogenesis                   | vasculogenesis                                                 | 3,09E-02 | C3,CTGF,CYR61               | 3 |
| Organismal Development                                | vasculogenesis                   | vasculogenesis                                                 | 3,09E-02 | C3,CTGF,CYR61               | 3 |
| Lipid Metabolism                                      | concentration                    | concentration of triacylglycerol                               | 3,12E-02 | C3,EGR1                     | 2 |
| Molecular Transport                                   | concentration                    | concentration of triacylglycerol                               | 3,12E-02 | C3,EGR1                     | 2 |
| Small Molecule Biochemistry                           | concentration                    | concentration of triacylglycerol                               | 3,12E-02 | C3,EGR1                     | 2 |
| Cell-To-Cell Signaling and Interaction                | adhesion                         | adhesion of fibroblasts                                        | 3,15E-02 | CTGF                        | 1 |
| Connective Tissue Development and Function            | adhesion                         | adhesion of fibroblasts                                        | 3,15E-02 | CTGF                        | 1 |
| Tissue Development                                    | adhesion                         | adhesion of fibroblasts                                        | 3,15E-02 | CTGF                        | 1 |
| Organ Morphology                                      | volume                           | volume of trabecular bone                                      | 3,15E-02 | CTGF                        | 1 |
| Skeletal and Muscular System Development and Function | volume                           | volume of trabecular bone                                      | 3,15E-02 | CTGF                        | 1 |
| Cancer                                                | uterine serous papillary cancer  | uterine serous papillary cancer                                | 3,23E-02 | CLDN5,ISG15                 | 2 |
| Reproductive System Disease                           | uterine serous papillary cancer  | uterine serous papillary cancer                                | 3,23E-02 | CLDN5,ISG15                 | 2 |
| Organ Morphology                                      | abnormal morphology              | abnormal morphology of long bone hypertrophic chondrocyte zone | 3,25E-02 | CTGF                        | 1 |
| Connective Tissue Development and Function            | abnormal morphology              | abnormal morphology of long bone hypertrophic chondrocyte zone | 3,25E-02 | CTGF                        | 1 |
| Embryonic Development                                 | abnormal morphology              | abnormal morphology of long bone hypertrophic chondrocyte zone | 3,25E-02 | CTGF                        | 1 |
| Organ Development                                     | abnormal morphology              | abnormal morphology of long bone hypertrophic chondrocyte zone | 3,25E-02 | CTGF                        | 1 |
| Organismal Development                                | abnormal morphology              | abnormal morphology of long bone hypertrophic chondrocyte zone | 3,25E-02 | CTGF                        | 1 |
| Skeletal and Muscular System Development and Function | abnormal morphology              | abnormal morphology of long bone hypertrophic chondrocyte zone | 3,25E-02 | CTGF                        | 1 |
| Tissue Development                                    | abnormal morphology              | abnormal morphology of long bone hypertrophic chondrocyte zone | 3,25E-02 | CTGF                        | 1 |
| Tissue Morphology                                     | abnormal morphology              | abnormal morphology of long bone hypertrophic chondrocyte zone | 3,25E-02 | CTGF                        | 1 |
| Hematological System Development and Function         | migration                        | migration of leukocyte cell lines                              | 3,25E-02 | C3                          | 1 |
| Cellular Movement                                     | migration                        | migration of leukocyte cell lines                              | 3,25E-02 | C3                          | 1 |
| Immune Cell Trafficking                               | migration                        | migration of leukocyte cell lines                              | 3,25E-02 | C3                          | 1 |
| Cell Morphology                                       | tubulation                       | tubulation of vascular endothelial cells                       | 3,25E-02 | CYR61                       | 1 |
| Cardiovascular System Development and Function        | tubulation                       | tubulation of vascular endothelial cells                       | 3,25E-02 | CYR61                       | 1 |
| Cellular Development                                  | tubulation                       | tubulation of vascular endothelial cells                       | 3,25E-02 | CYR61                       | 1 |
| Organismal Development                                | tubulation                       | tubulation of vascular endothelial cells                       | 3,25E-02 | CYR61                       | 1 |
| Tissue Development                                    | tubulation                       | tubulation of vascular endothelial cells                       | 3,25E-02 | CYR61                       | 1 |
| Organ Morphology                                      | abnormal morphology              | abnormal morphology of cornea                                  | 3,36E-02 | EGR1                        | 1 |
| Embryonic Development                                 | abnormal morphology              | abnormal morphology of cornea                                  | 3,36E-02 | EGR1                        | 1 |
| Organ Development                                     | abnormal morphology              | abnormal morphology of cornea                                  | 3,36E-02 | EGR1                        | 1 |
| Organismal Development                                | abnormal morphology              | abnormal morphology of cornea                                  | 3,36E-02 | EGR1                        | 1 |
| Tissue Development                                    | abnormal morphology              | abnormal morphology of cornea                                  | 3,36E-02 | EGR1                        | 1 |
| Visual System Development and Function                | abnormal morphology              | abnormal morphology of cornea                                  | 3,36E-02 | EGR1                        | 1 |
| Skeletal and Muscular System Development and Function | abnormal morphology              | abnormal morphology of rib cage                                | 3,36E-02 | CTGF                        | 1 |
| Cell-To-Cell Signaling and Interaction                | adhesion                         | adhesion of epithelial cell lines                              | 3,36E-02 | C3                          | 1 |
| Tissue Development                                    | adhesion                         | adhesion of epithelial cell lines                              | 3,36E-02 | C3                          | 1 |
| Hair and Skin Development and Function                | adhesion                         | adhesion of epithelial cell lines                              | 3,36E-02 | C3                          | 1 |
| Organ Morphology                                      | lack                             | lack of corpus luteum                                          | 3,36E-02 | EGR1                        | 1 |
| Reproductive System Development and Function          | lack                             | lack of corpus luteum                                          | 3,36E-02 | EGR1                        | 1 |
| Cellular Growth and Proliferation                     | proliferation                    | proliferation of myeloma cell lines                            | 3,36E-02 | SGK1                        | 1 |
| Cellular Development                                  | proliferation                    | proliferation of myeloma cell lines                            | 3,36E-02 | SGK1                        | 1 |
| Tissue Morphology                                     | area                             | area of atherosclerotic lesion                                 | 3,46E-02 | EGR1                        | 1 |
| Organismal Injury and Abnormalities                   | area                             | area of atherosclerotic lesion                                 | 3,46E-02 | EGR1                        | 1 |
| Cardiovascular Disease                                | area                             | area of atherosclerotic lesion                                 | 3,46E-02 | EGR1                        | 1 |
| Immunological Disease                                 | lymphadenopathy                  | lymphadenopathy                                                | 3,46E-02 | C3                          | 1 |
| Hematological System Development and Function         | phagocytosis                     | phagocytosis of neutrophils                                    | 3,46E-02 | C3                          | 1 |
| Inflammatory Response                                 | phagocytosis                     | phagocytosis of neutrophils                                    | 3,46E-02 | C3                          | 1 |
| Cell-To-Cell Signaling and Interaction                | phagocytosis                     | phagocytosis of neutrophils                                    | 3,46E-02 | C3                          | 1 |
| Cellular Function and Maintenance                     | phagocytosis                     | phagocytosis of neutrophils                                    | 3,46E-02 | C3                          | 1 |
| Antigen Presentation                                  | phagocytosis                     | phagocytosis of neutrophils                                    | 3,46E-02 | C3                          | 1 |
| Gastrointestinal Disease                              | primary sclerosing cholangitis   | primary sclerosing cholangitis                                 | 3,46E-02 | CTGF                        | 1 |
| Hepatic System Disease                                | primary sclerosing cholangitis   | primary sclerosing cholangitis                                 | 3,46E-02 | CTGF                        | 1 |
| Inflammatory Disease                                  | primary sclerosing cholangitis   | primary sclerosing cholangitis                                 | 3,46E-02 | CTGF                        | 1 |
| Lipid Metabolism                                      | uptake                           | uptake of fatty acid                                           | 3,46E-02 | C3                          | 1 |
| Molecular Transport                                   | uptake                           | uptake of fatty acid                                           | 3,46E-02 | C3                          | 1 |
| Small Molecule Biochemistry                           | uptake                           | uptake of fatty acid                                           | 3,46E-02 | C3                          | 1 |
| Hematological System Development and Function         | adhesion                         | adhesion of blood platelets                                    | 3,56E-02 | C3                          | 1 |
| Inflammatory Response                                 | adhesion                         | adhesion of blood platelets                                    | 3,56E-02 | C3                          | 1 |
| Cell-To-Cell Signaling and Interaction                | adhesion                         | adhesion of blood platelets                                    | 3,56E-02 | C3                          | 1 |
| Tissue Development                                    | adhesion                         | adhesion of blood platelets                                    | 3,56E-02 | C3                          | 1 |
| Endocrine System Development and Function             | concentration                    | concentration of aldosterone                                   | 3,56E-02 | SGK1                        | 1 |
| Lipid Metabolism                                      | concentration                    | concentration of aldosterone                                   | 3,56E-02 | SGK1                        | 1 |

|                                                       |                     |                                                           |          |                                |   |
|-------------------------------------------------------|---------------------|-----------------------------------------------------------|----------|--------------------------------|---|
| Molecular Transport                                   | concentration       | concentration of aldosterone                              | 3,56E-02 | SGK1                           | 1 |
| Small Molecule Biochemistry                           | concentration       | concentration of aldosterone                              | 3,56E-02 | SGK1                           | 1 |
| Hematological System Development and Function         | priming             | priming of T lymphocytes                                  | 3,56E-02 | C3                             | 1 |
| Inflammatory Response                                 | priming             | priming of T lymphocytes                                  | 3,56E-02 | C3                             | 1 |
| Cell-To-Cell Signaling and Interaction                | priming             | priming of T lymphocytes                                  | 3,56E-02 | C3                             | 1 |
| Immune Cell Trafficking                               | priming             | priming of T lymphocytes                                  | 3,56E-02 | C3                             | 1 |
| Lymphoid Tissue Structure and Development             | quantity            | quantity of germinal center                               | 3,56E-02 | C3                             | 1 |
| Humoral Immune Response                               | quantity            | quantity of germinal center                               | 3,56E-02 | C3                             | 1 |
| Hematological System Development and Function         | respiratory burst   | respiratory burst of neutrophils                          | 3,56E-02 | C3                             | 1 |
| Inflammatory Response                                 | respiratory burst   | respiratory burst of neutrophils                          | 3,56E-02 | C3                             | 1 |
| Cellular Compromise                                   | respiratory burst   | respiratory burst of neutrophils                          | 3,56E-02 | C3                             | 1 |
| Cell-To-Cell Signaling and Interaction                | respiratory burst   | respiratory burst of neutrophils                          | 3,56E-02 | C3                             | 1 |
| Cellular Function and Maintenance                     | respiratory burst   | respiratory burst of neutrophils                          | 3,56E-02 | C3                             | 1 |
| Antigen Presentation                                  | respiratory burst   | respiratory burst of neutrophils                          | 3,56E-02 | C3                             | 1 |
| Cell Death                                            | apoptosis           | apoptosis of fibroblast cell lines                        | 3,69E-02 | CYR61, EGR1                    | 2 |
| Organ Morphology                                      | abnormal morphology | abnormal morphology of skull                              | 3,67E-02 | CTGF                           | 1 |
| Connective Tissue Development and Function            | abnormal morphology | abnormal morphology of skull                              | 3,67E-02 | CTGF                           | 1 |
| Embryonic Development                                 | abnormal morphology | abnormal morphology of skull                              | 3,67E-02 | CTGF                           | 1 |
| Organ Development                                     | abnormal morphology | abnormal morphology of skull                              | 3,67E-02 | CTGF                           | 1 |
| Organismal Development                                | abnormal morphology | abnormal morphology of skull                              | 3,67E-02 | CTGF                           | 1 |
| Skeletal and Muscular System Development and Function | abnormal morphology | abnormal morphology of skull                              | 3,67E-02 | CTGF                           | 1 |
| Tissue Development                                    | abnormal morphology | abnormal morphology of skull                              | 3,67E-02 | CTGF                           | 1 |
| Hematological System Development and Function         | activation          | activation of neutrophils                                 | 3,67E-02 | C3                             | 1 |
| Inflammatory Response                                 | activation          | activation of neutrophils                                 | 3,67E-02 | C3                             | 1 |
| Cell-To-Cell Signaling and Interaction                | activation          | activation of neutrophils                                 | 3,67E-02 | C3                             | 1 |
| Immune Cell Trafficking                               | activation          | activation of neutrophils                                 | 3,67E-02 | C3                             | 1 |
| Antigen Presentation                                  | activation          | activation of neutrophils                                 | 3,67E-02 | C3                             | 1 |
| Cell-To-Cell Signaling and Interaction                | adhesion            | adhesion of kidney cell lines                             | 3,67E-02 | C3                             | 1 |
| Tissue Development                                    | adhesion            | adhesion of kidney cell lines                             | 3,67E-02 | C3                             | 1 |
| Renal and Urological System Development and Function  | adhesion            | adhesion of kidney cell lines                             | 3,67E-02 | C3                             | 1 |
| Tissue Morphology                                     | abnormal morphology | abnormal morphology of sternbrae                          | 3,77E-02 | CTGF                           | 1 |
| Cell-To-Cell Signaling and Interaction                | adhesion            | adhesion of fibroblast cell lines                         | 3,77E-02 | CTGF                           | 1 |
| Connective Tissue Development and Function            | adhesion            | adhesion of fibroblast cell lines                         | 3,77E-02 | CTGF                           | 1 |
| Tissue Development                                    | adhesion            | adhesion of fibroblast cell lines                         | 3,77E-02 | CTGF                           | 1 |
| Skeletal and Muscular Disorders                       | muscle weakness     | muscle weakness                                           | 3,77E-02 | C3                             | 1 |
| Endocrine System Development and Function             | quantity            | quantity of LH                                            | 3,77E-02 | EGR1                           | 1 |
| Molecular Transport                                   | quantity            | quantity of LH                                            | 3,77E-02 | EGR1                           | 1 |
| Small Molecule Biochemistry                           | quantity            | quantity of LH                                            | 3,77E-02 | EGR1                           | 1 |
| Molecular Transport                                   | quantity            | quantity of bilirubin                                     | 3,77E-02 | C3                             | 1 |
| Small Molecule Biochemistry                           | quantity            | quantity of bilirubin                                     | 3,77E-02 | C3                             | 1 |
| Cardiovascular Disease                                | vascular disease    | vascular disease                                          | 3,79E-02 | C3,CTGF,EGR1                   | 3 |
| Organ Morphology                                      | abnormal morphology | abnormal morphology of placental spongictrophoblast layer | 3,87E-02 | C3                             | 1 |
| Reproductive System Development and Function          | abnormal morphology | abnormal morphology of placental spongictrophoblast layer | 3,87E-02 | C3                             | 1 |
| Inflammatory Response                                 | autoimmune response | autoimmune response                                       | 3,87E-02 | C3                             | 1 |
| Hematological System Development and Function         | chemotaxis          | chemotaxis of leukocyte cell lines                        | 3,87E-02 | C3                             | 1 |
| Cellular Movement                                     | chemotaxis          | chemotaxis of leukocyte cell lines                        | 3,87E-02 | C3                             | 1 |
| Immune Cell Trafficking                               | chemotaxis          | chemotaxis of leukocyte cell lines                        | 3,87E-02 | C3                             | 1 |
| Cellular Growth and Proliferation                     | colony formation    | colony formation of lung cancer cell lines                | 3,87E-02 | CYR61                          | 1 |
| Cellular Development                                  | differentiation     | differentiation of germ cell tumor cell lines             | 3,87E-02 | EGR1                           | 1 |
| Cellular Assembly and Organization                    | rearrangement       | rearrangement of cytoskeleton                             | 3,87E-02 | CTGF                           | 1 |
| Infectious Disease                                    | replication         | replication of Hepatitis C virus                          | 3,87E-02 | ISG15                          | 1 |
| Hematological System Development and Function         | proliferation       | proliferation of lymphocytes                              | 3,88E-02 | C3,EGR1,ISG15                  | 3 |
| Cellular Growth and Proliferation                     | proliferation       | proliferation of lymphocytes                              | 3,88E-02 | C3,EGR1,ISG15                  | 3 |
| Cellular Development                                  | proliferation       | proliferation of lymphocytes                              | 3,88E-02 | C3,EGR1,ISG15                  | 3 |
| Neurological Disease                                  | seizures            | seizures                                                  | 3,90E-02 | C3,PCOLCE2 (includes EG-26577) | 2 |
| Visual System Development and Function                | vision              | vision                                                    | 3,98E-02 | EGR1                           | 1 |
| Cancer                                                | leiomyomatosis      | leiomyomatosis                                            | 3,99E-02 | CTGF,CYR61                     | 2 |
| Organ Morphology                                      | abnormal morphology | abnormal morphology of long bones                         | 4,08E-02 | CTGF                           | 1 |
| Connective Tissue Development and Function            | abnormal morphology | abnormal morphology of long bones                         | 4,08E-02 | CTGF                           | 1 |
| Embryonic Development                                 | abnormal morphology | abnormal morphology of long bones                         | 4,08E-02 | CTGF                           | 1 |
| Organ Development                                     | abnormal morphology | abnormal morphology of long bones                         | 4,08E-02 | CTGF                           | 1 |
| Organismal Development                                | abnormal morphology | abnormal morphology of long bones                         | 4,08E-02 | CTGF                           | 1 |
| Skeletal and Muscular System Development and Function | abnormal morphology | abnormal morphology of long bones                         | 4,08E-02 | CTGF                           | 1 |
| Tissue Development                                    | abnormal morphology | abnormal morphology of long bones                         | 4,08E-02 | CTGF                           | 1 |
| Lipid Metabolism                                      | absorption          | absorption of lipid                                       | 4,08E-02 | C3                             | 1 |
| Molecular Transport                                   | absorption          | absorption of lipid                                       | 4,08E-02 | C3                             | 1 |
| Small Molecule Biochemistry                           | absorption          | absorption of lipid                                       | 4,08E-02 | C3                             | 1 |
| Cardiovascular System Development and Function        | neovascularization  | neovascularization of retina                              | 4,08E-02 | C3                             | 1 |
| Organismal Development                                | neovascularization  | neovascularization of retina                              | 4,08E-02 | C3                             | 1 |
| Visual System Development and Function                | neovascularization  | neovascularization of retina                              | 4,08E-02 | C3                             | 1 |
| Cellular Function and Maintenance                     | function            | function of phagocytes                                    | 4,17E-02 | C3,EGR1                        | 2 |
| Organ Morphology                                      | abnormal morphology | abnormal morphology of dermis                             | 4,18E-02 | EGR1                           | 1 |
| Lipid Metabolism                                      | synthesis           | synthesis of triacylglycerol                              | 4,18E-02 | C3                             | 1 |
| Small Molecule Biochemistry                           | synthesis           | synthesis of triacylglycerol                              | 4,18E-02 | C3                             | 1 |
| Organ Morphology                                      | thickness           | thickness of trabecular bone                              | 4,18E-02 | CTGF                           | 1 |
| Skeletal and Muscular System Development and Function | thickness           | thickness of trabecular bone                              | 4,18E-02 | CTGF                           | 1 |
| Carbohydrate Metabolism                               | synthesis           | synthesis of carbohydrate                                 | 4,24E-02 | CTGF,Mup1 (includes others)    | 2 |
| Hematological System Development and Function         | function            | function of blood platelets                               | 4,28E-02 | C3                             | 1 |
| Cellular Function and Maintenance                     | function            | function of blood platelets                               | 4,28E-02 | C3                             | 1 |
| Cellular Growth and Proliferation                     | proliferation       | proliferation of chondrocytes                             | 4,28E-02 | CTGF                           | 1 |
| Cellular Development                                  | proliferation       | proliferation of chondrocytes                             | 4,28E-02 | CTGF                           | 1 |
| Connective Tissue Development and Function            | proliferation       | proliferation of chondrocytes                             | 4,28E-02 | CTGF                           | 1 |
| Hematological System Development and Function         | quantity            | quantity of mast cells                                    | 4,28E-02 | C3                             | 1 |
| Inflammatory Response                                 | quantity            | quantity of mast cells                                    | 4,28E-02 | C3                             | 1 |
| Tissue Morphology                                     | quantity            | quantity of mast cells                                    | 4,28E-02 | C3                             | 1 |
| Hypersensitivity Response                             | quantity            | quantity of mast cells                                    | 4,28E-02 | C3                             | 1 |
| Small Molecule Biochemistry                           | synthesis           | synthesis of D-glucose                                    | 4,28E-02 | Mup1 (includes others)         | 1 |
| Carbohydrate Metabolism                               | synthesis           | synthesis of D-glucose                                    | 4,28E-02 | Mup1 (includes others)         | 1 |
| Cancer                                                | tumorigenesis       | tumorigenesis of papilloma                                | 4,28E-02 | EGR1                           | 1 |

|                                                       |                           |                                        |          |                                     |   |
|-------------------------------------------------------|---------------------------|----------------------------------------|----------|-------------------------------------|---|
| Dermatological Diseases and Conditions                | tumorigenesis             | tumorigenesis of papilloma             | 4,28E-02 | EGR1                                | 1 |
| Hematological Disease                                 | anemia                    | anemia                                 | 4,34E-02 | C3,EGR1                             | 2 |
| Infectious Disease                                    | replication               | replication of Influenza A virus       | 4,34E-02 | ISG15,SGK1                          | 2 |
| Hematological System Development and Function         | accumulation              | accumulation of neutrophils            | 4,39E-02 | EGR1                                | 1 |
| Inflammatory Response                                 | accumulation              | accumulation of neutrophils            | 4,39E-02 | EGR1                                | 1 |
| Tissue Development                                    | accumulation              | accumulation of neutrophils            | 4,39E-02 | EGR1                                | 1 |
| Immune Cell Trafficking                               | accumulation              | accumulation of neutrophils            | 4,39E-02 | EGR1                                | 1 |
| Hematological System Development and Function         | differentiation           | differentiation of thymocytes          | 4,39E-02 | EGR1                                | 1 |
| Cellular Development                                  | differentiation           | differentiation of thymocytes          | 4,39E-02 | EGR1                                | 1 |
| Hematopoiesis                                         | differentiation           | differentiation of thymocytes          | 4,39E-02 | EGR1                                | 1 |
| Lymphoid Tissue Structure and Development             | differentiation           | differentiation of thymocytes          | 4,39E-02 | EGR1                                | 1 |
| Cell-mediated Immune Response                         | differentiation           | differentiation of thymocytes          | 4,39E-02 | EGR1                                | 1 |
| Cellular Function and Maintenance                     | differentiation           | differentiation of thymocytes          | 4,39E-02 | EGR1                                | 1 |
| Cellular Function and Maintenance                     | homeostasis               | cellular homeostasis                   | 4,39E-02 | C3,EGR1,Mup1 (includes others),SGK1 | 4 |
| Cell Morphology                                       | branching                 | branching of endothelial cells         | 4,49E-02 | CYR61                               | 1 |
| Cardiovascular System Development and Function        | branching                 | branching of endothelial cells         | 4,49E-02 | CYR61                               | 1 |
| Cellular Development                                  | branching                 | branching of endothelial cells         | 4,49E-02 | CYR61                               | 1 |
| Organismal Development                                | branching                 | branching of endothelial cells         | 4,49E-02 | CYR61                               | 1 |
| Cellular Function and Maintenance                     | function                  | function of mast cells                 | 4,49E-02 | C3                                  | 1 |
| Hypersensitivity Response                             | function                  | function of mast cells                 | 4,49E-02 | C3                                  | 1 |
| Organismal Injury and Abnormalities                   | atrophy                   | atrophy of thymus gland                | 4,59E-02 | EGR1                                | 1 |
| Immunological Disease                                 | atrophy                   | atrophy of thymus gland                | 4,59E-02 | EGR1                                | 1 |
| Drug Metabolism                                       | concentration             | concentration of progesterone          | 4,59E-02 | EGR1                                | 1 |
| Endocrine System Development and Function             | concentration             | concentration of progesterone          | 4,59E-02 | EGR1                                | 1 |
| Lipid Metabolism                                      | concentration             | concentration of progesterone          | 4,59E-02 | EGR1                                | 1 |
| Molecular Transport                                   | concentration             | concentration of progesterone          | 4,59E-02 | EGR1                                | 1 |
| Small Molecule Biochemistry                           | concentration             | concentration of progesterone          | 4,59E-02 | EGR1                                | 1 |
| Protein Synthesis                                     | quantity                  | quantity of GPT in blood               | 4,59E-02 | C3                                  | 1 |
| Cardiovascular Disease                                | vasculitis                | vasculitis                             | 4,59E-02 | C3                                  | 1 |
| Inflammatory Disease                                  | vasculitis                | vasculitis                             | 4,59E-02 | C3                                  | 1 |
| Lipid Metabolism                                      | concentration             | concentration of lipid                 | 4,61E-02 | C3,EGR1,SGK1                        | 3 |
| Molecular Transport                                   | concentration             | concentration of lipid                 | 4,61E-02 | C3,EGR1,SGK1                        | 3 |
| Small Molecule Biochemistry                           | concentration             | concentration of lipid                 | 4,61E-02 | C3,EGR1,SGK1                        | 3 |
| Cellular Assembly and Organization                    | development               | development of cytoplasm               | 4,62E-02 | CTGF,Mup1 (includes others)         | 2 |
| Organ Morphology                                      | abnormal morphology       | abnormal morphology of tibia           | 4,69E-02 | CTGF                                | 1 |
| Connective Tissue Development and Function            | abnormal morphology       | abnormal morphology of tibia           | 4,69E-02 | CTGF                                | 1 |
| Embryonic Development                                 | abnormal morphology       | abnormal morphology of tibia           | 4,69E-02 | CTGF                                | 1 |
| Organ Development                                     | abnormal morphology       | abnormal morphology of tibia           | 4,69E-02 | CTGF                                | 1 |
| Organismal Development                                | abnormal morphology       | abnormal morphology of tibia           | 4,69E-02 | CTGF                                | 1 |
| Skeletal and Muscular System Development and Function | abnormal morphology       | abnormal morphology of tibia           | 4,69E-02 | CTGF                                | 1 |
| Tissue Development                                    | abnormal morphology       | abnormal morphology of tibia           | 4,69E-02 | CTGF                                | 1 |
| Neurological Disease                                  | chronic fatigue syndrome  | chronic fatigue syndrome               | 4,69E-02 | C3                                  | 1 |
| Lipid Metabolism                                      | storage                   | storage of lipid                       | 4,69E-02 | Mup1 (includes others)              | 1 |
| Small Molecule Biochemistry                           | storage                   | storage of lipid                       | 4,69E-02 | Mup1 (includes others)              | 1 |
| Organismal Injury and Abnormalities                   | injury                    | injury of mice                         | 4,79E-02 | C3                                  | 1 |
| Cancer                                                | tumorigenesis             | tumorigenesis of thymic lymphoma       | 4,79E-02 | EGR1                                | 1 |
| Immunological Disease                                 | tumorigenesis             | tumorigenesis of thymic lymphoma       | 4,79E-02 | EGR1                                | 1 |
| Hematological Disease                                 | tumorigenesis             | tumorigenesis of thymic lymphoma       | 4,79E-02 | EGR1                                | 1 |
| Embryonic Development                                 | abnormal morphology       | abnormal morphology of germinal center | 4,90E-02 | C3                                  | 1 |
| Lymphoid Tissue Structure and Development             | abnormal morphology       | abnormal morphology of germinal center | 4,90E-02 | C3                                  | 1 |
| Organ Development                                     | abnormal morphology       | abnormal morphology of germinal center | 4,90E-02 | C3                                  | 1 |
| Organismal Development                                | abnormal morphology       | abnormal morphology of germinal center | 4,90E-02 | C3                                  | 1 |
| Tissue Development                                    | abnormal morphology       | abnormal morphology of germinal center | 4,90E-02 | C3                                  | 1 |
| Humoral Immune Response                               | abnormal morphology       | abnormal morphology of germinal center | 4,90E-02 | C3                                  | 1 |
| Developmental Disorder                                | chondrodysplasia          | chondrodysplasia                       | 4,90E-02 | CTGF                                | 1 |
| Skeletal and Muscular Disorders                       | chondrodysplasia          | chondrodysplasia                       | 4,90E-02 | CTGF                                | 1 |
| Hereditary Disorder                                   | chondrodysplasia          | chondrodysplasia                       | 4,90E-02 | CTGF                                | 1 |
| Connective Tissue Disorders                           | chondrodysplasia          | chondrodysplasia                       | 4,90E-02 | CTGF                                | 1 |
| Carbohydrate Metabolism                               | gluconeogenesis           | gluconeogenesis                        | 4,90E-02 | Mup1 (includes others)              | 1 |
| Molecular Transport                                   | transport                 | transport of Na+                       | 4,90E-02 | SGK1                                | 1 |
| Cell Death                                            | apoptosis                 | apoptosis of breast cell lines         | 5,00E-02 | SGK1                                | 1 |
| Cell Death                                            | clearance                 | clearance of cells                     | 5,00E-02 | C3                                  | 1 |
| Cellular Function and Maintenance                     | clearance                 | clearance of cells                     | 5,00E-02 | C3                                  | 1 |
| Cancer                                                | pancreatic adenocarcinoma | pancreatic adenocarcinoma              | 5,00E-02 | CYR61                               | 1 |
| Gastrointestinal Disease                              | pancreatic adenocarcinoma | pancreatic adenocarcinoma              | 5,00E-02 | CYR61                               | 1 |
| Hereditary Disorder                                   | pancreatic adenocarcinoma | pancreatic adenocarcinoma              | 5,00E-02 | CYR61                               | 1 |
| Endocrine System Disorders                            | pancreatic adenocarcinoma | pancreatic adenocarcinoma              | 5,00E-02 | CYR61                               | 1 |





|              |                          |                                                                                                   |        |          |
|--------------|--------------------------|---------------------------------------------------------------------------------------------------|--------|----------|
| A_52_P100926 | IL1A                     | interleukin 1, alpha                                                                              | -1,760 | 4,00E-06 |
| A_51_P161946 | C17orf96                 | chromosome 17 open reading frame 96                                                               | -1,754 | 4,35E-07 |
| A_52_P63680  | ACER1                    | alkaline ceramidase 1                                                                             | 1,749  | 9,52E-05 |
| A_51_P301804 | ST3GAL1                  | ST3 beta-galactosidase alpha-2,3-sialyltransferase 1                                              | -1,748 | 5,64E-08 |
| A_52_P296913 | CNMM1                    | cyclin M1                                                                                         | 1,748  | 1,62E-05 |
| A_51_P173043 | EGR2                     | early growth response 2                                                                           | -1,747 | 4,90E-10 |
| A_51_P488196 | BMPER                    | BMP binding endothelial regulator                                                                 | -1,744 | 4,69E-08 |
| A_51_P268931 | SLC2A6                   | solute carrier family 2 (facilitated glucose transporter), member 6                               | -1,734 | 2,55E-07 |
| A_51_P122321 | IL33                     | interleukin 33                                                                                    | -1,732 | 4,41E-06 |
| A_51_P123630 | IRG1                     | immunoresponsive 1 homolog (mouse)                                                                | -1,729 | 7,67E-03 |
| A_52_P851352 | IGFBP3                   | insulin-like growth factor binding protein 3                                                      | -1,728 | 2,43E-07 |
| A_52_P425839 | RETNLB                   | resistin like beta                                                                                | -1,727 | 5,78E-03 |
| A_52_P680627 | ABAT                     | 4-aminobutyrate aminotransferase                                                                  | 1,721  | 6,55E-07 |
| A_51_P356467 | CLDN4                    | claudin 4                                                                                         | -1,720 | 1,57E-07 |
| A_52_P68883  | DEFB103A/DEFB103B        | defensin, beta 103B                                                                               | -1,719 | 2,99E-06 |
| A_51_P174961 | F10                      | coagulation factor X                                                                              | -1,712 | 2,98E-06 |
| A_51_P461665 | CXCL9                    | chemokine (C-X-C motif) ligand 9                                                                  | -1,710 | 2,39E-07 |
| A_51_P240857 | CHPT1                    | choline phosphotransferase 1                                                                      | 1,710  | 7,59E-09 |
| A_51_P494293 | 9130024F11Rik            | RIKEN cDNA 9130024F11 gene                                                                        | 1,706  | 2,27E-07 |
| A_51_P398260 | TPPP                     | tubulin polymerization promoting protein                                                          | 1,705  | 4,43E-07 |
| A_51_P204486 | EXOC3L4                  | exocyst complex component 3-like 4                                                                | -1,700 | 3,33E-04 |
| A_51_P386648 | GLOD5                    | glyoxalase domain containing 5                                                                    | 1,699  | 7,33E-08 |
| A_51_P511270 | POLJF1                   | POU class 3 homeobox 1                                                                            | -1,697 | 2,83E-06 |
| A_51_P455326 | SELE (includes EG.20339) | selectin E                                                                                        | -1,689 | 4,15E-08 |
| A_52_P32453  | 1110020A21Rik            | RIKEN cDNA 1110020A21 gene                                                                        | 1,689  | 3,50E-08 |
| A_52_P504254 | ADTRP                    | androgen-dependent TFPI-regulating protein                                                        | 1,688  | 1,53E-05 |
| A_51_P216550 | TP63                     | tumor protein p63                                                                                 | -1,687 | 3,92E-05 |
| A_51_P420547 | CLIC5                    | chloride intracellular channel 5                                                                  | 1,686  | 2,91E-07 |
| A_51_P277994 | OAS2                     | 2'-5'-oligoadenylate synthetase 2, 69/71kDa                                                       | -1,684 | 6,43E-07 |
| A_51_P391955 | DAPL1                    | death associated protein-like 1                                                                   | -1,683 | 1,48E-09 |
| A_52_P161488 | CLEC4E                   | C-type lectin domain family 4, member E                                                           | -1,681 | 9,26E-05 |
| A_51_P452768 | CYP4F12                  | cytochrome P450, family 4, subfamily F, polypeptide 12                                            | 1,680  | 4,29E-07 |
| A_52_P326664 | UNC93A                   | unc-93 homolog A (C. elegans)                                                                     | -1,673 | 1,06E-08 |
| A_51_P410205 | HSD11B2                  | hydroxysteroid (11-beta) dehydrogenase 2                                                          | 1,673  | 1,17E-05 |
| A_52_P48569  | SLC38A4                  | solute carrier family 38, member 4                                                                | -1,671 | 4,63E-05 |
| A_51_P300493 | LOX                      | lysyl oxidase                                                                                     | -1,666 | 3,98E-09 |
| A_51_P316902 | SVOPL                    | SVOP-like                                                                                         | 1,665  | 2,98E-06 |
| A_52_P578732 | CCRS                     | chemokine (C-C motif) receptor 5 (gene/pseudogene)                                                | -1,662 | 4,92E-07 |
| A_51_P260312 | CSGALNACT1               | chondroitin sulfate N-acetylgalactosaminyltransferase 1                                           | -1,657 | 1,06E-08 |
| A_52_P63232  | TFCP2L1                  | transcription factor CP2-like 1                                                                   | 1,651  | 1,07E-06 |
| A_51_P436567 | Cox2b/Cox2c              | carboxylesterase 2C                                                                               | 1,650  | 4,05E-07 |
| A_52_P423814 | Cox8b                    | cytochrome c oxidase, subunit VIIIb                                                               | 1,650  | 2,59E-07 |
| A_52_P137104 | PRR15                    | proline rich 15                                                                                   | 1,648  | 2,40E-08 |
| A_51_P268673 | 2210016H18Rik            | RIKEN cDNA 2210016H18 gene                                                                        | 1,644  | 4,07E-07 |
| A_51_P498293 | FAM84A                   | family with sequence similarity 84, member A                                                      | -1,643 | 1,06E-08 |
| A_52_P347176 | NAT8L                    | N-acetyltransferase 8-like (GCN5-related, putative)                                               | -1,642 | 9,65E-08 |
| A_51_P132185 | Staf1 (includes others)  | stafin A1                                                                                         | -1,642 | 7,48E-07 |
| A_52_P535195 | GPBP1L1                  | GC-rich promoter binding protein 1-like 1                                                         | -1,639 | 2,42E-07 |
| A_51_P438853 | SERPINB11                | serpin peptidase inhibitor, clade B (ovalbumin), member 11 (gene/pseudogene)                      | -1,630 | 7,90E-07 |
| A_51_P117581 | CABLES1                  | Cdk5 and Abl enzyme substrate 1                                                                   | 1,630  | 2,26E-09 |
| A_51_P278368 | DNER                     | delta/notch-like EGF repeat containing                                                            | 1,626  | 1,77E-07 |
| A_51_P340170 | IL20RA                   | interleukin 20 receptor, alpha                                                                    | -1,624 | 2,06E-08 |
| A_51_P352875 | LCP2                     | lymphocytic cytosolic protein 2 (SH2 domain containing leukocyte protein of 76kDa)                | -1,623 | 8,28E-08 |
| A_51_P305896 | CFTF                     | cystic fibrosis transmembrane conductance regulator (ATP-binding cassette sub-family C, member 7) | 1,622  | 2,27E-06 |
| A_51_P482121 | EDN2                     | endothelin 2                                                                                      | 1,617  | 2,72E-08 |
| A_51_P282930 | RORC                     | RAR-related orphan receptor C                                                                     | 1,613  | 9,53E-07 |
| A_52_P237077 | ESR1                     | estrogen receptor 1                                                                               | -1,612 | 1,33E-07 |
| A_51_P354838 | KRT75                    | keratin 75                                                                                        | -1,612 | 7,47E-09 |
| A_51_P255473 | OR5K1                    | olfactory receptor, family 5, subfamily K, member 1                                               | 1,608  | 1,34E-03 |
| A_51_P263471 | CLEC6A                   | C-type lectin domain family 6, member A                                                           | -1,604 | 1,06E-09 |
| A_52_P507214 | MMP9                     | matrix metalloproteinase 9 (gelatinase B, 92kDa gelatinase, 92kDa type IV collagenase)            | -1,604 | 7,59E-07 |
| A_51_P309307 | BCL2L15                  | BCL2-like 15                                                                                      | -1,603 | 1,62E-05 |
| A_51_P297925 | ZC3H12A                  | zinc finger CCHH-type containing 12A                                                              | -1,602 | 2,13E-07 |
| A_51_P255395 | COL7A1                   | collagen, type VII, alpha 1                                                                       | -1,601 | 4,44E-08 |



|                                                |                                |                                            |          |                                                                                                                    |    |
|------------------------------------------------|--------------------------------|--------------------------------------------|----------|--------------------------------------------------------------------------------------------------------------------|----|
| Hematological System Development and Function  | chemotaxis                     | chemotaxis of granulocytes                 | 1.02E-06 | CAMP (includes EG:12796),Chi3/3/Chi3/4,CXCL10,CXCL9,CXCR2,IFNG (includes EG:15978),SELL                            | 7  |
| Immune Cell Trafficking                        | chemotaxis                     | chemotaxis of granulocytes                 | 1.02E-06 | CAMP (includes EG:12796),Chi3/3/Chi3/4,CXCL10,CXCL9,CXCR2,IFNG (includes EG:15978),SELL                            | 7  |
| Inflammatory Response                          | chemotaxis of granulocytes     | chemotaxis of granulocytes                 | 1.02E-06 | CAMP (includes EG:12796),Chi3/3/Chi3/4,CXCL10,CXCL9,CXCR2,IFNG (includes EG:15978),SELL                            | 7  |
| Cellular Movement                              | cell movement                  | cell movement of lymphocytes               | 1.03E-06 | CAMP (includes EG:12796),Chi3/3/Chi3/4,CXCL10,CXCL9,IFNG (includes EG:15978),IL6,PTGS2,SELL,ZC3H12A                | 9  |
| Hematological System Development and Function  | cell movement                  | cell movement of lymphocytes               | 1.03E-06 | CAMP (includes EG:12796),Chi3/3/Chi3/4,CXCL10,CXCL9,IFNG (includes EG:15978),IL6,PTGS2,SELL,ZC3H12A                | 9  |
| Immune Cell Trafficking                        | cell movement                  | cell movement of lymphocytes               | 1.03E-06 | CAMP (includes EG:12796),Chi3/3/Chi3/4,CXCL10,CXCL9,IFNG (includes EG:15978),IL6,PTGS2,SELL,ZC3H12A                | 9  |
| Hematological System Development and Function  | binding                        | binding of leukocytes                      | 1.05E-06 | CAMP (includes EG:12796),Chi3/3/Chi3/4,CXCL10,CXCL9,CXCR2,IFNG (includes EG:15978),MARCO,PTPRC,SELL                | 7  |
| Cell-To-Cell Signaling and Interaction         | inflammation                   | inflammation of central nervous system     | 1.05E-06 | CXCL10,CXCL9,CXCR2,IFNG (includes EG:15978),MARCO,PTPRC,SELL                                                       | 7  |
| Inflammatory Response                          | psoriasis                      | psoriasis                                  | 1.06E-06 | CXCL10,IFNG (includes EG:15978),PTGS2,PTPRC                                                                        | 7  |
| Dermatological Diseases and Conditions         | psoriasis                      | psoriasis                                  | 1.13E-06 | CAMP (includes EG:12796),CSTA,CXCL10,CXCL9,CXCR2,IFNG (includes EG:15978),IL6,LCE3D,PM20D1,PTGS2,PTPRC             | 11 |
| Cell-To-Cell Signaling and Interaction         | binding                        | binding of tumor cell lines                | 1.23E-06 | CAMP (includes EG:12796),CXCL10,CXCL9,CXCR2,IFNG (includes EG:15978),IL6,SELL                                      | 7  |
| Inflammatory Response                          | inflammatory response          | inflammatory response                      | 1.26E-06 | CAMP (includes EG:12796),Chi3/3/Chi3/4,CXCL10,CXCL9,CXCR2,IFNG (includes EG:15978),IL6,MARCO,MMP8,PTGS2,PTPRC,SELL | 12 |
| Cardiovascular System Development and Function | systolic pressure              | systolic pressure of right ventricle       | 1.38E-06 | ACE2 (includes EG:302668),IL6,PTGS2                                                                                | 3  |
| Cellular Movement                              | chemotaxis                     | chemotaxis of myeloid cells                | 1.43E-06 | CAMP (includes EG:12796),Chi3/3/Chi3/4,CXCL10,CXCL9,CXCR2,IFNG (includes EG:15978),PTPRC,SELL                      | 8  |
| Hematological System Development and Function  | chemotaxis                     | chemotaxis of myeloid cells                | 1.43E-06 | CAMP (includes EG:12796),Chi3/3/Chi3/4,CXCL10,CXCL9,CXCR2,IFNG (includes EG:15978),PTPRC,SELL                      | 8  |
| Immune Cell Trafficking                        | chemotaxis                     | chemotaxis of myeloid cells                | 1.43E-06 | CAMP (includes EG:12796),Chi3/3/Chi3/4,CXCL10,CXCL9,CXCR2,IFNG (includes EG:15978),PTPRC,SELL                      | 8  |
| Inflammatory Response                          | chemotaxis                     | chemotaxis of myeloid cells                | 1.43E-06 | CAMP (includes EG:12796),Chi3/3/Chi3/4,CXCL10,CXCL9,CXCR2,IFNG (includes EG:15978),PTPRC,SELL                      | 8  |
| Lipid Metabolism                               | conversion                     | conversion of lipid                        | 1.48E-06 | Akr1c14,CFTR,CYP2C19,HPGD,IFNG (includes EG:15978),IL6,PTGS2                                                       | 7  |
| Small Molecule Biochemistry                    | conversion                     | conversion of lipid                        | 1.48E-06 | Akr1c14,CFTR,CYP2C19,HPGD,IFNG (includes EG:15978),IL6,PTGS2                                                       | 7  |
| Humoral Immune Response                        | quantity                       | quantity of immunoglobulin                 | 1.64E-06 | CXCL10,CXCL9,CXCR2,IFNG (includes EG:15978),IL6,MARCO,PTGS2,ZC3H12A                                                | 8  |
| Protein Synthesis                              | quantity                       | quantity of immunoglobulin                 | 1.64E-06 | CXCL10,CXCL9,CXCR2,IFNG (includes EG:15978),IL6,MARCO,PTGS2,ZC3H12A                                                | 8  |
| Infectious Disease                             | tuberculosis                   | tuberculosis                               | 1.88E-06 | CAMP (includes EG:12796),CXCL9,CXCR2,IFNG (includes EG:15978),IL6                                                  | 5  |
| Cellular Movement                              | chemotaxis                     | chemotaxis of cells                        | 1.91E-06 | CAMP (includes EG:12796),Chi3/3/Chi3/4,CXCL10,CXCL9,CXCR2,IFNG (includes EG:15978),IL6,PTGS2,PTPRC,SELL            | 10 |
| Hematological System Development and Function  | activation                     | activation of phagocytes                   | 2.35E-06 | CAMP (includes EG:12796),CXCL10,CXCR2,FOXA2,IFNG (includes EG:15978),IL6,PTGS2,SELL                                | 8  |
| Immune Cell Trafficking                        | activation                     | activation of phagocytes                   | 2.35E-06 | CAMP (includes EG:12796),CXCL10,CXCR2,FOXA2,IFNG (includes EG:15978),IL6,PTGS2,SELL                                | 8  |
| Inflammatory Response                          | activation                     | activation of phagocytes                   | 2.35E-06 | CAMP (includes EG:12796),CXCL10,CXCR2,FOXA2,IFNG (includes EG:15978),IL6,PTGS2,SELL                                | 8  |
| Cell-To-Cell Signaling and Interaction         | activation                     | activation of phagocytes                   | 2.35E-06 | CAMP (includes EG:12796),CXCL10,CXCR2,FOXA2,IFNG (includes EG:15978),IL6,PTGS2,SELL                                | 8  |
| Inflammatory Response                          | inflammation                   | inflammation of organ                      | 2.68E-06 | CAMP (includes EG:12796),CFTR,Chi3/3/Chi3/4,CXCR2,FOXA2,HPGD,IFNG (includes EG:15978),IL6,MS4A1,PTGS2,PTPRC,SELL   | 12 |
| Nutritional Disease                            | body mass index                | body mass index                            | 2.86E-06 | ACSM3,APOB,FABP2,IL6,PPARGC1A                                                                                      | 5  |
| Cellular Movement                              | chemotaxis                     | chemotaxis of eosinophils                  | 3.12E-06 | CAMP (includes EG:12796),Chi3/3/Chi3/4,CXCL10,CXCL9                                                                | 4  |
| Hematological System Development and Function  | chemotaxis                     | chemotaxis of eosinophils                  | 3.12E-06 | CAMP (includes EG:12796),Chi3/3/Chi3/4,CXCL10,CXCL9                                                                | 4  |
| Immune Cell Trafficking                        | chemotaxis                     | chemotaxis of eosinophils                  | 3.12E-06 | CAMP (includes EG:12796),Chi3/3/Chi3/4,CXCL10,CXCL9                                                                | 4  |
| Inflammatory Response                          | chemotaxis                     | chemotaxis of eosinophils                  | 3.12E-06 | CAMP (includes EG:12796),Chi3/3/Chi3/4,CXCL10,CXCL9                                                                | 4  |
| Hypersensitivity Response                      | chemotaxis                     | chemotaxis of eosinophils                  | 3.12E-06 | CAMP (includes EG:12796),Chi3/3/Chi3/4,CXCL10,CXCL9                                                                | 4  |
| Connective Tissue Development and Function     | formation                      | formation of granulation tissue            | 3.61E-06 | IFNG (includes EG:15978),IL6,SELL                                                                                  | 3  |
| Tissue Development                             | formation                      | formation of granulation tissue            | 3.61E-06 | IFNG (includes EG:15978),IL6,SELL                                                                                  | 3  |
| Hematological System Development and Function  | function                       | function of myeloid cells                  | 3.65E-06 | CXCL10,CXCR2,IFNG (includes EG:15978),IL6,MARCO,PTGS2,SELL                                                         | 7  |
| Cellular Function and Maintenance              | function                       | function of myeloid cells                  | 3.65E-06 | CXCL10,CXCR2,IFNG (includes EG:15978),IL6,MARCO,PTGS2,SELL                                                         | 7  |
| Cell Death and Survival                        | cell death                     | cell death of macrophage cancer cell lines | 3.82E-06 | CAMP (includes EG:12796),IFNG (includes EG:15978),PTPRC,ZC3H12A                                                    | 4  |
| Cellular Movement                              | recruitment                    | recruitment of neutrophils                 | 4.46E-06 | CAMP (includes EG:12796),CXCL10,CXCR2,IFNG (includes EG:15978),IL6,SELL                                            | 6  |
| Hematological System Development and Function  | recruitment                    | recruitment of neutrophils                 | 4.46E-06 | CAMP (includes EG:12796),CXCL10,CXCR2,IFNG (includes EG:15978),IL6,SELL                                            | 6  |
| Immune Cell Trafficking                        | recruitment                    | recruitment of neutrophils                 | 4.46E-06 | CAMP (includes EG:12796),CXCL10,CXCR2,IFNG (includes EG:15978),IL6,SELL                                            | 6  |
| Inflammatory Response                          | recruitment                    | recruitment of neutrophils                 | 4.46E-06 | CAMP (includes EG:12796),CXCL10,CXCR2,IFNG (includes EG:15978),IL6,SELL                                            | 6  |
| Cell-To-Cell Signaling and Interaction         | recruitment                    | recruitment of neutrophils                 | 4.46E-06 | CAMP (includes EG:12796),CXCL10,CXCR2,IFNG (includes EG:15978),IL6,SELL                                            | 6  |
| Organismal Functions                           | healing                        | healing of wound                           | 4.62E-06 | CXCR2,IFNG (includes EG:15978),IL6,PTGS2,SCNN1G,SELL                                                               | 6  |
| Tissue Morphology                              | healing                        | healing of wound                           | 4.62E-06 | CXCR2,IFNG (includes EG:15978),IL6,PTGS2,SCNN1G,SELL                                                               | 6  |
| Organismal Injury and Abnormalities            | wound                          | wound                                      | 4.78E-06 | CAMP (includes EG:12796),CXCR2,IFNG (includes EG:15978),IL6,PTGS2,SELL                                             | 6  |
| Hematological System Development and Function  | accumulation                   | accumulation of granulocytes               | 4.92E-06 | CXCL10,CXCL9,IFNG (includes EG:15978),MMP8,SELL                                                                    | 5  |
| Immune Cell Trafficking                        | accumulation                   | accumulation of granulocytes               | 4.92E-06 | CXCL10,CXCL9,IFNG (includes EG:15978),MMP8,SELL                                                                    | 5  |
| Inflammatory Response                          | accumulation                   | accumulation of granulocytes               | 4.92E-06 | CXCL10,CXCL9,IFNG (includes EG:15978),MMP8,SELL                                                                    | 5  |
| Tissue Development                             | accumulation                   | accumulation of granulocytes               | 4.92E-06 | CXCL10,CXCL9,IFNG (includes EG:15978),MMP8,SELL                                                                    | 5  |
| Cellular Movement                              | migration                      | NK cell migration                          | 5.10E-06 | CXCL10,CXCL9,IFNG (includes EG:15978),SELL                                                                         | 4  |
| Hematological System Development and Function  | migration                      | NK cell migration                          | 5.10E-06 | CXCL10,CXCL9,IFNG (includes EG:15978),SELL                                                                         | 4  |
| Immune Cell Trafficking                        | migration                      | NK cell migration                          | 5.10E-06 | CXCL10,CXCL9,IFNG (includes EG:15978),SELL                                                                         | 4  |
| Cell-mediated Immune Response                  | migration                      | NK cell migration                          | 5.10E-06 | CXCL10,CXCL9,IFNG (includes EG:15978),SELL                                                                         | 4  |
| Immunological Disease                          | hypersensitive reaction        | hypersensitive reaction                    | 5.14E-06 | CXCL10,CXCL9,IFNG (includes EG:15978),SELL                                                                         | 4  |
| Lipid Metabolism                               | concentration                  | concentration of lipid                     | 5.53E-06 | AADAC,ACER1,APOB,CAMP (includes EG:12796),CFTR,FABP2,FOXA2,HPGD,IFNG (includes EG:15978),IL6,PPARGC1A,PTGS2        | 9  |
| Small Molecule Biochemistry                    | concentration                  | concentration of lipid                     | 5.53E-06 | AADAC,ACER1,APOB,CAMP (includes EG:12796),CFTR,FABP2,FOXA2,HPGD,IFNG (includes EG:15978),IL6,PPARGC1A,PTGS2        | 12 |
| Molecular Transport                            | concentration                  | concentration of lipid                     | 5.53E-06 | AADAC,ACER1,APOB,CAMP (includes EG:12796),CFTR,FABP2,FOXA2,HPGD,IFNG (includes EG:15978),IL6,PPARGC1A,PTGS2        | 12 |
| Cellular Movement                              | cell movement                  | cell movement of monocytes                 | 5.65E-06 | CAMP (includes EG:12796),CXCL10,CXCL9,CXCR2,IFNG (includes EG:15978),IL6                                           | 6  |
| Hematological System Development and Function  | cell movement                  | cell movement of monocytes                 | 5.65E-06 | CAMP (includes EG:12796),CXCL10,CXCL9,CXCR2,IFNG (includes EG:15978),IL6                                           | 6  |
| Immune Cell Trafficking                        | cell movement                  | cell movement of monocytes                 | 5.65E-06 | CAMP (includes EG:12796),CXCL10,CXCL9,CXCR2,IFNG (includes EG:15978),IL6                                           | 6  |
| Inflammatory Response                          | cell movement                  | cell movement of monocytes                 | 5.65E-06 | CAMP (includes EG:12796),CXCL10,CXCL9,CXCR2,IFNG (includes EG:15978),IL6                                           | 6  |
| Infectious Disease                             | infection                      | infection of mammalia                      | 5.67E-06 | CAMP (includes EG:12796),CFTR,CXCL10,CXCR2,IFNG (includes EG:15978),IL6,MARCO,MMP8                                 | 8  |
| Infectious Disease                             | anthrax                        | anthrax                                    | 5.95E-06 | CXCL10,CXCL9,IFNG (includes EG:15978)                                                                              | 3  |
| Dermatological Diseases and Conditions         | chronic large plaque psoriasis | chronic large plaque psoriasis             | 5.95E-06 | CXCL10,CXCL9,IFNG (includes EG:15978)                                                                              | 3  |
| Dermatological Diseases and Conditions         | chronic small plaque psoriasis | chronic small plaque psoriasis             | 5.95E-06 | CXCL10,CXCL9,IFNG (includes EG:15978)                                                                              | 3  |
| Organismal Injury and Abnormalities            | formation                      | formation of vascular lesion               | 6.63E-06 | APOB,CXCL10,IFNG (includes EG:15978),IL6,PTGS2                                                                     | 5  |
| Cardiovascular Disease                         | formation                      | formation of vascular lesion               | 6.63E-06 | APOB,CXCL10,IFNG (includes EG:15978),IL6,PTGS2                                                                     | 5  |
| Cellular Movement                              | transmigration                 | transmigration of granulocytes             | 6.66E-06 | CXCL10,CXCL9,CXCR2,IL6                                                                                             | 4  |
| Hematological System Development and Function  | transmigration                 | transmigration of granulocytes             | 6.66E-06 | CXCL10,CXCL9,CXCR2,IL6                                                                                             | 4  |
| Immune Cell Trafficking                        | transmigration                 | transmigration of granulocytes             | 6.66E-06 | CXCL10,CXCL9,CXCR2,IL6                                                                                             | 4  |
| Gene Expression                                | binding                        | binding of LPS/IL1 response element        | 6.69E-06 | IFNG (includes EG:15978),IL6                                                                                       | 2  |
| Hematological System Development and Function  | function                       | function of macrophages                    | 6.87E-06 | CXCL10,IFNG (includes EG:15978),IL6,MARCO,PTGS2,SELL                                                               | 6  |
| Cellular Function and Maintenance              | function                       | function of macrophages                    | 6.87E-06 | CXCL10,IFNG (includes EG:15978),IL6,MARCO,PTGS2,SELL                                                               | 6  |
| Humoral Immune Response                        | quantity                       | quantity of IgG2a                          | 6.96E-06 | CXCL10,IFNG (includes EG:15978),IL6,PTGS2,ZC3H12A                                                                  | 5  |
| Protein Synthesis                              | quantity                       | quantity of IgG2a                          | 6.96E-06 | CXCL10,IFNG (includes EG:15978),IL6,PTGS2,ZC3H12A                                                                  | 5  |
| Cellular Movement                              | cell movement                  | cell movement of mast cells                | 7.25E-06 | CAMP (includes EG:12796),CFTR,CXCL10,SELL                                                                          | 4  |
| Hematological System Development and Function  | cell movement                  | cell movement of mast cells                | 7.25E-06 | CAMP (includes EG:12796),CFTR,CXCL10,SELL                                                                          | 4  |
| Immune Cell Trafficking                        | cell movement                  | cell movement of mast cells                | 7.25E-06 | CAMP (includes EG:12796),CFTR,CXCL10,SELL                                                                          | 4  |
| Inflammatory Response                          | cell movement                  | cell movement of mast cells                | 7.25E-06 | CAMP (includes EG:12796),CFTR,CXCL10,SELL                                                                          | 4  |
| Hypersensitivity Response                      | cell movement                  | cell movement of mast cells                | 7.25E-06 | CAMP (includes EG:12796),CFTR,CXCL10,SELL                                                                          | 4  |
| Cellular Movement                              | recruitment                    | recruitment of antigen presenting cells    | 8.01E-06 | APOB,CXCL10,CXCR2,FOXA2,IFNG (includes EG:15978)                                                                   | 4  |
| Hematological System Development and Function  | recruitment                    | recruitment of antigen presenting cells    | 8.01E-06 | APOB,CXCL10,CXCR2,FOXA2,IFNG (includes EG:15978)                                                                   | 5  |
| Immune Cell Trafficking                        | recruitment                    | recruitment of antigen presenting cells    | 8.01E-06 | APOB,CXCL10,CXCR2,FOXA2,IFNG (includes EG:15978)                                                                   | 5  |
| Cell-To-Cell Signaling and Interaction         | recruitment                    | recruitment of antigen presenting cells    | 8.01E-06 | APOB,CXCL10,CXCR2,FOXA2,IFNG (includes EG:15978)                                                                   | 5  |
| Hematological System Development and Function  | adhesion                       | adhesion of immune cells                   | 8.85E-06 | CXCL10,CXCL9,CXCR2,IFNG (includes EG:15978),IL6,MARCO,PTPRC,SELL                                                   | 8  |
| Immune Cell Trafficking                        | adhesion                       | adhesion of immune cells                   | 8.85E-06 | CXCL10,CXCL9,CXCR2,IFNG (includes EG:15978),IL6,MARCO,PTPRC,SELL                                                   | 8  |
| Cell-To-Cell Signaling and Interaction         | adhesion                       | adhesion of immune cells                   | 8.85E-06 | CXCL10,CXCL9,CXCR2,IFNG (includes EG:15978),IL6,MARCO,PTPRC,SELL                                                   | 8  |



|                                                |                                  |                                                |          |                                                                                                              |    |
|------------------------------------------------|----------------------------------|------------------------------------------------|----------|--------------------------------------------------------------------------------------------------------------|----|
| Tissue Development                             | adhesion                         | adhesion of immune cells                       | 8,85E-06 | CXCL10,CXCL9,CXCR2,IFNG (includes EG:15978),IL6,MARCO,PTPRC,SELL                                             | 8  |
| Cellular Movement                              | chemotaxis                       | chemotaxis of endothelial cell lines           | 9,11E-06 | CXCL10,CXCL9,CXCR2                                                                                           | 3  |
| Cardiovascular System Development and Function | chemotaxis                       | chemotaxis of endothelial cell lines           | 9,11E-06 | CXCL10,CXCL9,CXCR2                                                                                           | 3  |
| Lipid Metabolism                               | induction                        | induction of prostaglandin                     | 9,11E-06 | CAMP (includes EG:12796),IL6,PTGS2                                                                           | 3  |
| Small Molecule Biochemistry                    | induction                        | induction of prostaglandin                     | 9,11E-06 | CAMP (includes EG:12796),IL6,PTGS2                                                                           | 3  |
| Inflammatory Response                          | inflammation                     | inflammation of peritoneum                     | 9,11E-06 | CFTR,PTGS2,SELL                                                                                              | 3  |
| Hematological Disease                          | chronic B-cell leukemia          | chronic B-cell leukemia                        | 9,18E-06 | CXCL9,IFNG (includes EG:15978),IL6,MS4A1,SELL                                                                | 5  |
| Immunological Disease                          | chronic B-cell leukemia          | chronic B-cell leukemia                        | 9,18E-06 | CXCL9,IFNG (includes EG:15978),IL6,MS4A1,SELL                                                                | 5  |
| Cancer                                         | chronic B-cell leukemia          | chronic B-cell leukemia                        | 9,18E-06 | CXCL9,IFNG (includes EG:15978),IL6,MS4A1,SELL                                                                | 5  |
| Cellular Movement                              | migration                        | migration of neutrophils                       | 9,18E-06 | CAMP (includes EG:12796),CXCR2,IFNG (includes EG:15978),IL6,SELL                                             | 5  |
| Hematological System Development and Function  | migration                        | migration of neutrophils                       | 9,18E-06 | CAMP (includes EG:12796),CXCR2,IFNG (includes EG:15978),IL6,SELL                                             | 5  |
| Immune Cell Trafficking                        | migration                        | migration of neutrophils                       | 9,18E-06 | CAMP (includes EG:12796),CXCR2,IFNG (includes EG:15978),IL6,SELL                                             | 5  |
| Inflammatory Response                          | migration                        | migration of neutrophils                       | 9,18E-06 | CAMP (includes EG:12796),CXCR2,IFNG (includes EG:15978),IL6,SELL                                             | 5  |
| Cellular Movement                              | migration                        | migration of phagocytes                        | 1,03E-05 | CAMP (includes EG:12796),CXCL10,CXCL9,CXCR2,IFNG (includes EG:15978),IL6,SELL                                | 7  |
| Hematological System Development and Function  | migration                        | migration of phagocytes                        | 1,03E-05 | CAMP (includes EG:12796),CXCL10,CXCL9,CXCR2,IFNG (includes EG:15978),IL6,SELL                                | 7  |
| Immune Cell Trafficking                        | migration                        | migration of phagocytes                        | 1,03E-05 | CAMP (includes EG:12796),CXCL10,CXCL9,CXCR2,IFNG (includes EG:15978),IL6,SELL                                | 7  |
| Inflammatory Response                          | migration                        | migration of phagocytes                        | 1,03E-05 | CAMP (includes EG:12796),CXCL10,CXCL9,CXCR2,IFNG (includes EG:15978),IL6,SELL                                | 7  |
| Lipid Metabolism                               | metabolism                       | fatty acid metabolism                          | 1,03E-05 | ACSM3,APOB,CFTR,FABP2,HPGD,IFNG (includes EG:15978),IL6,MS4A1,PPARGC1A,PTGS2                                 | 10 |
| Small Molecule Biochemistry                    | metabolism                       | fatty acid metabolism                          | 1,03E-05 | ACSM3,APOB,CFTR,FABP2,HPGD,IFNG (includes EG:15978),IL6,MS4A1,PPARGC1A,PTGS2                                 | 10 |
| Cellular Movement                              | homing                           | homing of T lymphocytes                        | 1,05E-05 | CAMP (includes EG:12796),Ch3i3/Ch3i34,CXCL10,CXCL9,SELL                                                      | 5  |
| Hematological System Development and Function  | homing                           | homing of T lymphocytes                        | 1,05E-05 | CAMP (includes EG:12796),Ch3i3/Ch3i34,CXCL10,CXCL9,SELL                                                      | 5  |
| Immune Cell Trafficking                        | homing                           | homing of T lymphocytes                        | 1,05E-05 | CAMP (includes EG:12796),Ch3i3/Ch3i34,CXCL10,CXCL9,SELL                                                      | 5  |
| Cell-mediated Immune Response                  | homing                           | homing of T lymphocytes                        | 1,05E-05 | CAMP (includes EG:12796),Ch3i3/Ch3i34,CXCL10,CXCL9,SELL                                                      | 5  |
| Cardiovascular Disease                         | abdominal aortic aneurysm        | abdominal aortic aneurysm                      | 1,10E-05 | CXCL10,IFNG (includes EG:15978),PTGS2                                                                        | 3  |
| Hematological Disease                          | follicular non-Hodgkin's disease | follicular non-Hodgkin's disease               | 1,10E-05 | IFNG (includes EG:15978),IL6,MS4A1                                                                           | 3  |
| Cancer                                         | follicular non-Hodgkin's disease | follicular non-Hodgkin's disease               | 1,10E-05 | IFNG (includes EG:15978),IL6,MS4A1                                                                           | 3  |
| Inflammatory Response                          | immune response                  | immune response of phagocytes                  | 1,12E-05 | CAMP (includes EG:12796),CXCL10,IFNG (includes EG:15978),IL6,MARCO,PTPRC                                     | 6  |
| Cell-To-Cell Signaling and Interaction         | immune response                  | immune response of phagocytes                  | 1,12E-05 | CAMP (includes EG:12796),CXCL10,IFNG (includes EG:15978),IL6,MARCO,PTPRC                                     | 6  |
| Lymphoid Tissue Structure and Development      | morphology                       | morphology of spleen                           | 1,20E-05 | CXCR2,IFNG (includes EG:15978),MARCO,PTGS2,PTPRC,SELL,ZC3H12A                                                | 7  |
| Organ Morphology                               | morphology                       | morphology of spleen                           | 1,20E-05 | CXCR2,IFNG (includes EG:15978),MARCO,PTGS2,PTPRC,SELL,ZC3H12A                                                | 7  |
| Inflammatory Disease                           | dermatitis                       | Dermatitis                                     | 1,23E-05 | CAMP (includes EG:12796),CXCL9,IFNG (includes EG:15978),LCE3D,PPARGC1A,PTGS2,SELL,TRPV3                      | 8  |
| Dermatological Diseases and Conditions         | dermatitis                       | Dermatitis                                     | 1,23E-05 | CAMP (includes EG:12796),CXCL9,IFNG (includes EG:15978),LCE3D,PPARGC1A,PTGS2,SELL,TRPV3                      | 8  |
| Cell-To-Cell Signaling and Interaction         | response                         | response of myeloid cells                      | 1,25E-05 | CAMP (includes EG:12796),CXCL10,IFNG (includes EG:15978),IL6,MARCO,PTPRC                                     | 6  |
| Hematological System Development and Function  | activation                       | activation of granulocytes                     | 1,30E-05 | CXCL9,CXCR2,IFNG (includes EG:15978),IL6,SELL                                                                | 5  |
| Immune Cell Trafficking                        | activation                       | activation of granulocytes                     | 1,30E-05 | CXCL9,CXCR2,IFNG (includes EG:15978),IL6,SELL                                                                | 5  |
| Inflammatory Response                          | activation                       | activation of granulocytes                     | 1,30E-05 | CXCL9,CXCR2,IFNG (includes EG:15978),IL6,SELL                                                                | 5  |
| Cell-To-Cell Signaling and Interaction         | activation                       | activation of granulocytes                     | 1,30E-05 | CXCL9,CXCR2,IFNG (includes EG:15978),IL6,SELL                                                                | 5  |
| Cellular Movement                              | attraction                       | attraction of dendritic cells                  | 1,32E-05 | CAMP (includes EG:12796),CXCL10,CXCL9                                                                        | 3  |
| Immune Cell Trafficking                        | attraction                       | attraction of dendritic cells                  | 1,32E-05 | CAMP (includes EG:12796),CXCL10,CXCL9                                                                        | 3  |
| Cell-To-Cell Signaling and Interaction         | attraction                       | attraction of dendritic cells                  | 1,32E-05 | CAMP (includes EG:12796),CXCL10,CXCL9                                                                        | 3  |
| Cardiovascular System Development and Function | differentiation                  | differentiation of vascular endothelial cells  | 1,32E-05 | CXCL10,IFNG (includes EG:15978),PTGS2                                                                        | 3  |
| Cellular Development                           | differentiation                  | differentiation of vascular endothelial cells  | 1,32E-05 | CXCL10,IFNG (includes EG:15978),PTGS2                                                                        | 3  |
| Cellular Movement                              | transmigration                   | transmigration of leukocytes                   | 1,41E-05 | CXCL10,CXCL9,CXCR2,IFNG (includes EG:15978),IL6                                                              | 5  |
| Hematological System Development and Function  | transmigration                   | transmigration of leukocytes                   | 1,41E-05 | CXCL10,CXCL9,CXCR2,IFNG (includes EG:15978),IL6                                                              | 5  |
| Immune Cell Trafficking                        | transmigration                   | transmigration of leukocytes                   | 1,41E-05 | CXCL10,CXCL9,CXCR2,IFNG (includes EG:15978),IL6                                                              | 5  |
| Hematological System Development and Function  | quantity                         | quantity of leukocytes                         | 1,43E-05 | CAMP (includes EG:12796),CXCL10,CXCR2,GPR83,IFNG (includes EG:15978),IL6,MMP8,MS4A1,PTGS2,PTPRC,SELL,ZC3H12A | 12 |
| Tissue Morphology                              | quantity                         | quantity of leukocytes                         | 1,43E-05 | CAMP (includes EG:12796),CXCL10,CXCR2,GPR83,IFNG (includes EG:15978),IL6,MMP8,MS4A1,PTGS2,PTPRC,SELL,ZC3H12A | 12 |
| Hematological System Development and Function  | phagocytosis                     | phagocytosis of myeloid cells                  | 1,47E-05 | CAMP (includes EG:12796),CXCL10,IFNG (includes EG:15978),MARCO,PTPRC                                         | 5  |
| Inflammatory Response                          | phagocytosis                     | phagocytosis of myeloid cells                  | 1,47E-05 | CAMP (includes EG:12796),CXCL10,IFNG (includes EG:15978),MARCO,PTPRC                                         | 5  |
| Cell-To-Cell Signaling and Interaction         | phagocytosis                     | phagocytosis of myeloid cells                  | 1,47E-05 | CAMP (includes EG:12796),CXCL10,IFNG (includes EG:15978),MARCO,PTPRC                                         | 5  |
| Cellular Function and Maintenance              | phagocytosis                     | phagocytosis of myeloid cells                  | 1,47E-05 | CAMP (includes EG:12796),CXCL10,IFNG (includes EG:15978),MARCO,PTPRC                                         | 5  |
| Inflammatory Response                          | phagocytosis                     | phagocytosis of myeloid cells                  | 1,47E-05 | CAMP (includes EG:12796),CXCL10,IFNG (includes EG:15978),MARCO,PTPRC                                         | 5  |
| Cell-To-Cell Signaling and Interaction         | phagocytosis                     | phagocytosis of phagocytes                     | 1,53E-05 | CAMP (includes EG:12796),CXCL10,IFNG (includes EG:15978),MARCO,PTPRC                                         | 5  |
| Cellular Function and Maintenance              | phagocytosis                     | phagocytosis of phagocytes                     | 1,53E-05 | CAMP (includes EG:12796),CXCL10,IFNG (includes EG:15978),MARCO,PTPRC                                         | 5  |
| Cellular Function and Maintenance              | phagocytosis                     | phagocytosis of phagocytes                     | 1,53E-05 | CAMP (includes EG:12796),CXCL10,IFNG (includes EG:15978),MARCO,PTPRC                                         | 5  |
| Cellular Function and Maintenance              | internalization                  | internalization of cells                       | 1,66E-05 | CAMP (includes EG:12796),CFTR,IFNG (includes EG:15978),MARCO                                                 | 4  |
| Cell Death and Survival                        | cell death                       | cell death of lung cancer cell lines           | 1,75E-05 | CAMP (includes EG:12796),FOXQ2,IFNG (includes EG:15978),IL6,PTGS2,SLC7A11                                    | 6  |
| Inflammatory Response                          | immune response                  | immune response of macrophages                 | 1,86E-05 | CAMP (includes EG:12796),IFNG (includes EG:15978),IL6,MARCO,PTPRC                                            | 5  |
| Cell-To-Cell Signaling and Interaction         | immune response                  | immune response of macrophages                 | 1,86E-05 | CAMP (includes EG:12796),IFNG (includes EG:15978),IL6,MARCO,PTPRC                                            | 5  |
| Cell Death and Survival                        | apoptosis                        | apoptosis of neutrophils                       | 1,90E-05 | CAMP (includes EG:12796),IFNG (includes EG:15978),IL6,MMP8                                                   | 4  |
| Immunological Disease                          | Graves' ophthalmopathy           | Graves' ophthalmopathy                         | 2,00E-05 | IL6,MS4A1                                                                                                    | 2  |
| Endocrine System Disorders                     | Graves' ophthalmopathy           | Graves' ophthalmopathy                         | 2,00E-05 | IL6,MS4A1                                                                                                    | 2  |
| Hereditary Disorder                            | Graves' ophthalmopathy           | Graves' ophthalmopathy                         | 2,00E-05 | IL6,MS4A1                                                                                                    | 2  |
| Metabolic Disease                              | Graves' ophthalmopathy           | Graves' ophthalmopathy                         | 2,00E-05 | IL6,MS4A1                                                                                                    | 2  |
| Ophthalmic Disease                             | Graves' ophthalmopathy           | Graves' ophthalmopathy                         | 2,00E-05 | IL6,MS4A1                                                                                                    | 2  |
| Hematological System Development and Function  | aggregation                      | aggregation of hematopoietic progenitor cells  | 2,00E-05 | CXCL10,CXCL9                                                                                                 | 2  |
| Tissue Development                             | aggregation                      | aggregation of hematopoietic progenitor cells  | 2,00E-05 | CXCL10,CXCL9                                                                                                 | 2  |
| Hematopoiesis                                  | aggregation                      | aggregation of hematopoietic progenitor cells  | 2,00E-05 | CXCL10,CXCL9                                                                                                 | 2  |
| Cellular Movement                              | attraction                       | attraction of Th1 cells                        | 2,00E-05 | CXCL10,CXCL9                                                                                                 | 2  |
| Hematological System Development and Function  | attraction                       | attraction of Th1 cells                        | 2,00E-05 | CXCL10,CXCL9                                                                                                 | 2  |
| Immune Cell Trafficking                        | attraction                       | attraction of Th1 cells                        | 2,00E-05 | CXCL10,CXCL9                                                                                                 | 2  |
| Cell-To-Cell Signaling and Interaction         | attraction                       | attraction of Th1 cells                        | 2,00E-05 | CXCL10,CXCL9                                                                                                 | 2  |
| Cellular Movement                              | attraction                       | attraction of plasmacytoid dendritic cells     | 2,00E-05 | CXCL10,CXCL9                                                                                                 | 2  |
| Immune Cell Trafficking                        | attraction                       | attraction of plasmacytoid dendritic cells     | 2,00E-05 | CXCL10,CXCL9                                                                                                 | 2  |
| Cell-To-Cell Signaling and Interaction         | attraction                       | attraction of plasmacytoid dendritic cells     | 2,00E-05 | CXCL10,CXCL9                                                                                                 | 2  |
| Cellular Function and Maintenance              | autophagy                        | autophagy of monocytes                         | 2,00E-05 | CAMP (includes EG:12796),IFNG (includes EG:15978)                                                            | 2  |
| Cell Morphology                                | autophagy                        | autophagy of monocytes                         | 2,00E-05 | CAMP (includes EG:12796),IFNG (includes EG:15978)                                                            | 2  |
| Lipid Metabolism                               | conversion                       | conversion of eicosapentenoic acid             | 2,00E-05 | CFTR,PTGS2                                                                                                   | 2  |
| Small Molecule Biochemistry                    | conversion                       | conversion of eicosapentenoic acid             | 2,00E-05 | CFTR,PTGS2                                                                                                   | 2  |
| Hematological System Development and Function  | polarization                     | polarization of hematopoietic progenitor cells | 2,00E-05 | CXCL10,CXCL9                                                                                                 | 2  |
| Cell Morphology                                | polarization                     | polarization of hematopoietic progenitor cells | 2,00E-05 | CXCL10,CXCL9                                                                                                 | 2  |
| Hematopoiesis                                  | polarization                     | polarization of hematopoietic progenitor cells | 2,00E-05 | CXCL10,CXCL9                                                                                                 | 2  |
| Cellular Movement                              | influx                           | influx of leukocytes                           | 2,02E-05 | CXCR2,IFNG (includes EG:15978),IL6,MARCO                                                                     | 4  |
| Hematological System Development and Function  | influx                           | influx of leukocytes                           | 2,02E-05 | CXCR2,IFNG (includes EG:15978),IL6,MARCO                                                                     | 4  |
| Immune Cell Trafficking                        | influx                           | influx of leukocytes                           | 2,02E-05 | CXCR2,IFNG (includes EG:15978),IL6,MARCO                                                                     | 4  |
| Immunological Disease                          | systemic autoimmune syndrome     | systemic autoimmune syndrome                   | 2,03E-05 | CAMP (includes EG:12796),CXCL10,CXCL9,CXCR2,IFNG (includes EG:15978),IL6,MMP8,MS4A1,PTGS2,PTPRC,SELL,SLC7A11 | 12 |
| Respiratory Disease                            | damage                           | damage of lung                                 | 2,08E-05 | CXCR2,IFNG (includes EG:15978),IL6,MARCO,PTGS2                                                               | 5  |
| Organismal Injury and Abnormalities            | damage                           | damage of lung                                 | 2,08E-05 | CXCR2,IFNG (includes EG:15978),IL6,MARCO,PTGS2                                                               | 5  |
| Cellular Movement                              | chemotaxis                       | chemotaxis of neuroglia                        | 2,15E-05 | CXCL10,CXCL9,IL6                                                                                             | 3  |
| Infectious Disease                             | quantity                         | quantity of virus                              | 2,16E-05 | CXCL9,IFNG (includes EG:15978),IL6,PTGS2                                                                     | 4  |

|                                               |                            |                                           |          |                                                                                                             |    |
|-----------------------------------------------|----------------------------|-------------------------------------------|----------|-------------------------------------------------------------------------------------------------------------|----|
| Cellular Function and Maintenance             | function                   | function of phagocytes                    | 2.38E-05 | CXCL10,CXCR2,IFNG (includes EG:15978),IL6,MARCO,PTGS2,SELL                                                  | 7  |
| Hematological System Development and Function | activation                 | activation of leukocytes                  | 2.39E-05 | CAMP (includes EG:12796),CXCL10,CXCL9,CXCR2,FOXA2,IFNG (includes EG:15978),IL6,PTGS2,PTPRC,SELL             | 10 |
| Immune Cell Trafficking                       | activation                 | activation of leukocytes                  | 2.39E-05 | CAMP (includes EG:12796),CXCL10,CXCL9,CXCR2,FOXA2,IFNG (includes EG:15978),IL6,PTGS2,PTPRC,SELL             | 10 |
| Inflammatory Response                         | activation                 | activation of leukocytes                  | 2.39E-05 | CAMP (includes EG:12796),CXCL10,CXCL9,CXCR2,FOXA2,IFNG (includes EG:15978),IL6,PTGS2,PTPRC,SELL             | 10 |
| Cell-To-Cell Signaling and Interaction        | activation                 | activation of leukocytes                  | 2.39E-05 | CAMP (includes EG:12796),CXCL10,CXCL9,CXCR2,FOXA2,IFNG (includes EG:15978),IL6,PTGS2,PTPRC,SELL             | 10 |
| Cell-To-Cell Signaling and Interaction        | binding                    | binding of leukemia cell lines            | 2.44E-05 | CXCR2,IFNG (includes EG:15978),IL6,SELL                                                                     | 4  |
| Cellular Movement                             | chemotaxis                 | chemotaxis of embryonic cell lines        | 2.48E-05 | CAMP (includes EG:12796),CXCL10,CXCR2                                                                       | 3  |
| Embryonic Development                         | chemotaxis                 | chemotaxis of embryonic cell lines        | 2.48E-05 | CAMP (includes EG:12796),CXCL10,CXCR2                                                                       | 3  |
| Cellular Movement                             | chemotaxis                 | chemotaxis of epithelial cell lines       | 2.48E-05 | CAMP (includes EG:12796),CXCL10,CXCR2                                                                       | 3  |
| Hair and Skin Development and Function        | chemotaxis                 | chemotaxis of epithelial cell lines       | 2.48E-05 | CAMP (includes EG:12796),CXCL10,CXCR2                                                                       | 3  |
| Cellular Movement                             | trafficking                | trafficking of T lymphocytes              | 2.48E-05 | CXCL10,IFNG (includes EG:15978),SELL                                                                        | 3  |
| Hematological System Development and Function | trafficking                | trafficking of T lymphocytes              | 2.48E-05 | CXCL10,IFNG (includes EG:15978),SELL                                                                        | 3  |
| Immune Cell Trafficking                       | trafficking                | trafficking of T lymphocytes              | 2.48E-05 | CXCL10,IFNG (includes EG:15978),SELL                                                                        | 3  |
| Cell-mediated Immune Response                 | trafficking                | trafficking of T lymphocytes              | 2.48E-05 | CXCL10,IFNG (includes EG:15978),SELL                                                                        | 3  |
| Cell-To-Cell Signaling and Interaction        | binding                    | binding of cells                          | 2.64E-05 | CAMP (includes EG:12796),CXCL10,CXCL9,CXCR2,IFNG (includes EG:15978),IL6,MARCO,PTPRC,SELL                   | 9  |
| Tissue Morphology                             | abnormal morphology        | abnormal morphology of lymph node         | 2.78E-05 | CXCR2,IFNG (includes EG:15978),PTGS2,SELL,ZC3H12A                                                           | 5  |
| Lymphoid Tissue Structure and Development     | abnormal morphology        | abnormal morphology of lymph node         | 2.78E-05 | CXCR2,IFNG (includes EG:15978),PTGS2,SELL,ZC3H12A                                                           | 5  |
| Organ Morphology                              | abnormal morphology        | abnormal morphology of lymph node         | 2.78E-05 | CXCR2,IFNG (includes EG:15978),PTGS2,SELL,ZC3H12A                                                           | 5  |
| Cellular Movement                             | cell rolling               | cell rolling of mononuclear leukocytes    | 2.85E-05 | CXCR2,IFNG (includes EG:15978),SELL                                                                         | 3  |
| Hematological System Development and Function | cell rolling               | cell rolling of mononuclear leukocytes    | 2.85E-05 | CXCR2,IFNG (includes EG:15978),SELL                                                                         | 3  |
| Immune Cell Trafficking                       | cell rolling               | cell rolling of mononuclear leukocytes    | 2.85E-05 | CXCR2,IFNG (includes EG:15978),SELL                                                                         | 3  |
| Cellular Movement                             | recruitment                | recruitment of inflammatory leukocytes    | 2.85E-05 | CXCL10,IFNG (includes EG:15978),IL6                                                                         | 3  |
| Hematological System Development and Function | recruitment                | recruitment of inflammatory leukocytes    | 2.85E-05 | CXCL10,IFNG (includes EG:15978),IL6                                                                         | 3  |
| Immune Cell Trafficking                       | recruitment                | recruitment of inflammatory leukocytes    | 2.85E-05 | CXCL10,IFNG (includes EG:15978),IL6                                                                         | 3  |
| Cell-To-Cell Signaling and Interaction        | recruitment                | recruitment of inflammatory leukocytes    | 2.85E-05 | CXCL10,IFNG (includes EG:15978),IL6                                                                         | 3  |
| Molecular Transport                           | quantity                   | quantity of metal ion                     | 2.92E-05 | CXCL10,CXCL9,CXCR2,IFNG (includes EG:15978),IL6,PTGS2,PTPRC,SCNN1G,SELL                                     | 9  |
| Cellular Function and Maintenance             | function                   | function of leukocytes                    | 3.03E-05 | CXCL10,CXCR2,IFNG (includes EG:15978),IL6,MARCO,MS4A1,PTGS2,PTPRC,SELL                                      | 9  |
| Hematological Disease                         | lymphocytic leukemia       | lymphocytic leukemia                      | 3.20E-05 | CXCL9,IFNG (includes EG:15978),IL6,MS4A1,PTPRC,SELL                                                         | 6  |
| Immunological Disease                         | lymphocytic leukemia       | lymphocytic leukemia                      | 3.20E-05 | CXCL9,IFNG (includes EG:15978),IL6,MS4A1,PTPRC,SELL                                                         | 6  |
| Cancer                                        | lymphocytic leukemia       | lymphocytic leukemia                      | 3.20E-05 | CXCL9,IFNG (includes EG:15978),IL6,MS4A1,PTPRC,SELL                                                         | 6  |
| Cell-To-Cell Signaling and Interaction        | activation                 | activation of cells                       | 3.23E-05 | CAMP (includes EG:12796),CXCL10,CXCL9,CXCR2,FOXA2,IFNG (includes EG:15978),IL6,MS4A1,PTGS2,PTPRC,SELL,TRPV3 | 12 |
| Cell-To-Cell Signaling and Interaction        | activation                 | activation of epithelial cells            | 3.25E-05 | CAMP (includes EG:12796),IFNG (includes EG:15978),TRPV3                                                     | 3  |
| Organismal Injury and Abnormalities           | formation                  | formation of lesion                       | 3.27E-05 | APOB,CFTL,CXCL10,IFNG (includes EG:15978),IL6,PTGS2                                                         | 6  |
| Hematological System Development and Function | adhesion                   | adhesion of phagocytes                    | 3.42E-05 | CXCR2,IFNG (includes EG:15978),IL6,MARCO,SELL                                                               | 5  |
| Immune Cell Trafficking                       | adhesion                   | adhesion of phagocytes                    | 3.42E-05 | CXCR2,IFNG (includes EG:15978),IL6,MARCO,SELL                                                               | 5  |
| Inflammatory Response                         | adhesion                   | adhesion of phagocytes                    | 3.42E-05 | CXCR2,IFNG (includes EG:15978),IL6,MARCO,SELL                                                               | 5  |
| Cell-To-Cell Signaling and Interaction        | adhesion                   | adhesion of phagocytes                    | 3.42E-05 | CXCR2,IFNG (includes EG:15978),IL6,MARCO,SELL                                                               | 5  |
| Tissue Development                            | adhesion                   | adhesion of phagocytes                    | 3.42E-05 | CXCR2,IFNG (includes EG:15978),IL6,MARCO,SELL                                                               | 5  |
| Hematological System Development and Function | binding                    | binding of myeloid cells                  | 3.47E-05 | CXCL10,CXCR2,IFNG (includes EG:15978),SELL                                                                  | 4  |
| Cell-To-Cell Signaling and Interaction        | binding                    | binding of myeloid cells                  | 3.47E-05 | CXCL10,CXCR2,IFNG (includes EG:15978),SELL                                                                  | 4  |
| Hematological System Development and Function | maturation                 | maturation of T lymphocytes               | 3.47E-05 | IFNG (includes EG:15978),IL6,PTGS2,PTPRC                                                                    | 4  |
| Cellular Development                          | maturation                 | maturation of T lymphocytes               | 3.47E-05 | IFNG (includes EG:15978),IL6,PTGS2,PTPRC                                                                    | 4  |
| Hematopoiesis                                 | maturation                 | maturation of T lymphocytes               | 3.47E-05 | IFNG (includes EG:15978),IL6,PTGS2,PTPRC                                                                    | 4  |
| Cellular Movement                             | cell movement              | cell movement of antigen presenting cells | 3.63E-05 | CAMP (includes EG:12796),CXCL10,CXCL9,CXCR2,IFNG (includes EG:15978),PTGS2,SELL                             | 7  |
| Hematological System Development and Function | cell movement              | cell movement of antigen presenting cells | 3.63E-05 | CAMP (includes EG:12796),CXCL10,CXCL9,CXCR2,IFNG (includes EG:15978),PTGS2,SELL                             | 7  |
| Immune Cell Trafficking                       | cell movement              | cell movement of antigen presenting cells | 3.63E-05 | CAMP (includes EG:12796),CXCL10,CXCL9,CXCR2,IFNG (includes EG:15978),PTGS2,SELL                             | 7  |
| Cardiovascular Disease                        | heart failure              | heart failure                             | 3.68E-05 | ACE2 (includes EG:302668),HPGD,IFNG (includes EG:15978),IL6,PPARGC1A,PTGS2                                  | 6  |
| Humoral Immune Response                       | quantity                   | quantity of IgG                           | 3.76E-05 | CXCL10,CXCL9,IFNG (includes EG:15978),IL6,PTGS2,ZC3H12A                                                     | 6  |
| Protein Synthesis                             | quantity                   | quantity of IgG                           | 3.76E-05 | CXCL10,CXCL9,IFNG (includes EG:15978),IL6,PTGS2,ZC3H12A                                                     | 6  |
| Hematological System Development and Function | quantity                   | quantity of lymphocytes                   | 3.92E-05 | CAMP (includes EG:12796),CXCL10,CXCR2,GPR83,IFNG (includes EG:15978),IL6,MS4A1,PTPRC,SELL,ZC3H12A           | 10 |
| Tissue Morphology                             | quantity                   | quantity of lymphocytes                   | 3.92E-05 | CAMP (includes EG:12796),CXCL10,CXCR2,GPR83,IFNG (includes EG:15978),IL6,MS4A1,PTPRC,SELL,ZC3H12A           | 10 |
| Respiratory Disease                           | growth                     | growth of lung carcinoma                  | 4.00E-05 | CXCR2,PTGS2                                                                                                 | 2  |
| Cancer                                        | growth                     | growth of lung carcinoma                  | 4.00E-05 | CXCR2,PTGS2                                                                                                 | 2  |
| Cellular Movement                             | migration                  | migration of cytotoxic T cells            | 4.00E-05 | CXCL10,CXCL9                                                                                                | 2  |
| Hematological System Development and Function | migration                  | migration of cytotoxic T cells            | 4.00E-05 | CXCL10,CXCL9                                                                                                | 2  |
| Immune Cell Trafficking                       | migration                  | migration of cytotoxic T cells            | 4.00E-05 | CXCL10,CXCL9                                                                                                | 2  |
| Cell-mediated Immune Response                 | migration                  | migration of cytotoxic T cells            | 4.00E-05 | CXCL10,CXCL9                                                                                                | 2  |
| Energy Production                             | oxidation                  | oxidation of prostaglandin                | 4.00E-05 | HPGD,PTGS2                                                                                                  | 2  |
| Lipid Metabolism                              | oxidation                  | oxidation of prostaglandin                | 4.00E-05 | HPGD,PTGS2                                                                                                  | 2  |
| Small Molecule Biochemistry                   | oxidation                  | oxidation of prostaglandin                | 4.00E-05 | HPGD,PTGS2                                                                                                  | 2  |
| Cellular Movement                             | recruitment                | recruitment of Th1 cells                  | 4.00E-05 | CXCL10,CXCL9                                                                                                | 2  |
| Hematological System Development and Function | recruitment                | recruitment of Th1 cells                  | 4.00E-05 | CXCL10,CXCL9                                                                                                | 2  |
| Immune Cell Trafficking                       | recruitment                | recruitment of Th1 cells                  | 4.00E-05 | CXCL10,CXCL9                                                                                                | 2  |
| Cell-To-Cell Signaling and Interaction        | recruitment                | recruitment of Th1 cells                  | 4.00E-05 | CXCL10,CXCL9                                                                                                | 2  |
| Cell-mediated Immune Response                 | recruitment                | recruitment of Th1 cells                  | 4.00E-05 | CXCL10,CXCL9                                                                                                | 2  |
| Hematological System Development and Function | sensitization              | sensitization of macrophages              | 4.00E-05 | IFNG (includes EG:15978),IL6                                                                                | 2  |
| Inflammatory Response                         | sensitization              | sensitization of macrophages              | 4.00E-05 | IFNG (includes EG:15978),IL6                                                                                | 2  |
| Cell-To-Cell Signaling and Interaction        | sensitization              | sensitization of macrophages              | 4.00E-05 | IFNG (includes EG:15978),IL6                                                                                | 2  |
| Cell Morphology                               | whole-cell conductance     | whole-cell conductance of oocytes         | 4.00E-05 | CFTL,SCNN1G                                                                                                 | 2  |
| Reproductive System Development and Function  | whole-cell conductance     | whole-cell conductance of oocytes         | 4.00E-05 | CFTL,SCNN1G                                                                                                 | 2  |
| Hematological System Development and Function | activation                 | activation of antigen presenting cells    | 4.03E-05 | CAMP (includes EG:12796),CXCL10,FOXA2,IFNG (includes EG:15978),IL6,PTGS2                                    | 6  |
| Immune Cell Trafficking                       | activation                 | activation of antigen presenting cells    | 4.03E-05 | CAMP (includes EG:12796),CXCL10,FOXA2,IFNG (includes EG:15978),IL6,PTGS2                                    | 6  |
| Inflammatory Response                         | activation                 | activation of antigen presenting cells    | 4.03E-05 | CAMP (includes EG:12796),CXCL10,FOXA2,IFNG (includes EG:15978),IL6,PTGS2                                    | 6  |
| Cell-To-Cell Signaling and Interaction        | activation                 | activation of antigen presenting cells    | 4.03E-05 | CAMP (includes EG:12796),CXCL10,FOXA2,IFNG (includes EG:15978),IL6,PTGS2                                    | 6  |
| Lipid Metabolism                              | conversion                 | conversion of eicosanoid                  | 4.16E-05 | CFTL,HPGD,PTGS2                                                                                             | 3  |
| Small Molecule Biochemistry                   | conversion                 | conversion of eicosanoid                  | 4.16E-05 | CFTL,HPGD,PTGS2                                                                                             | 3  |
| Cellular Movement                             | recruitment                | recruitment of lymphocytes                | 4.53E-05 | CXCL10,CXCL9,IFNG (includes EG:15978),SELL                                                                  | 4  |
| Hematological System Development and Function | recruitment                | recruitment of lymphocytes                | 4.53E-05 | CXCL10,CXCL9,IFNG (includes EG:15978),SELL                                                                  | 4  |
| Immune Cell Trafficking                       | recruitment                | recruitment of lymphocytes                | 4.53E-05 | CXCL10,CXCL9,IFNG (includes EG:15978),SELL                                                                  | 4  |
| Cell-To-Cell Signaling and Interaction        | recruitment                | recruitment of lymphocytes                | 4.53E-05 | CXCL10,CXCL9,IFNG (includes EG:15978),SELL                                                                  | 4  |
| Immunological Disease                         | immediate hypersensitivity | immediate hypersensitivity                | 4.53E-05 | CAMP (includes EG:12796),CXCL9,IFNG (includes EG:15978),LCE3D,PPARGC1A,PTGS2,PTPRC                          | 4  |
| Hematological System Development and Function | quantity                   | quantity of B lymphocytes                 | 4.63E-05 | CAMP (includes EG:12796),CXCR2,IFNG (includes EG:15978),IL6,MS4A1,PTPRC,ZC3H12A                             | 7  |
| Humoral Immune Response                       | quantity                   | quantity of B lymphocytes                 | 4.63E-05 | CAMP (includes EG:12796),CXCR2,IFNG (includes EG:15978),IL6,MS4A1,PTPRC,ZC3H12A                             | 7  |
| Tissue Morphology                             | quantity                   | quantity of B lymphocytes                 | 4.63E-05 | CAMP (includes EG:12796),CXCR2,IFNG (includes EG:15978),IL6,MS4A1,PTPRC,ZC3H12A                             | 7  |
| Cellular Movement                             | chemoattraction            | chemoattraction of myeloid cells          | 4.67E-05 | CAMP (includes EG:12796),CXCL10,CXCL9                                                                       | 3  |
| Hematological System Development and Function | chemoattraction            | chemoattraction of myeloid cells          | 4.67E-05 | CAMP (includes EG:12796),CXCL10,CXCL9                                                                       | 3  |
| Immune Cell Trafficking                       | chemoattraction            | chemoattraction of myeloid cells          | 4.67E-05 | CAMP (includes EG:12796),CXCL10,CXCL9                                                                       | 3  |
| Inflammatory Response                         | chemoattraction            | chemoattraction of myeloid cells          | 4.67E-05 | CAMP (includes EG:12796),CXCL10,CXCL9                                                                       | 3  |
| Cell-To-Cell Signaling and Interaction        | chemoattraction            | chemoattraction of myeloid cells          | 4.67E-05 | CAMP (includes EG:12796),CXCL10,CXCL9                                                                       | 3  |

|                                                      |                                  |                                                 |          |                                                                                                                                                       |    |
|------------------------------------------------------|----------------------------------|-------------------------------------------------|----------|-------------------------------------------------------------------------------------------------------------------------------------------------------|----|
| Cellular Movement                                    | chemotaxis                       | chemotaxis of antigen presenting cells          | 4,72E-05 | CAMP (includes EG:12796),CXCL10,CXCL9,CXCR2,SELL                                                                                                      | 5  |
| Hematological System Development and Function        | chemotaxis                       | chemotaxis of antigen presenting cells          | 4,72E-05 | CAMP (includes EG:12796),CXCL10,CXCL9,CXCR2,SELL                                                                                                      | 5  |
| Immune Cell Trafficking                              | chemotaxis                       | chemotaxis of antigen presenting cells          | 4,72E-05 | CAMP (includes EG:12796),CXCL10,CXCL9,CXCR2,SELL                                                                                                      | 5  |
| Inflammatory Response                                | chemotaxis                       | chemotaxis of antigen presenting cells          | 4,72E-05 | CAMP (includes EG:12796),CXCL10,CXCL9,CXCR2,SELL                                                                                                      | 5  |
| Lipid Metabolism                                     | synthesis                        | synthesis of fatty acid                         | 4,87E-05 | ACSM3,CFTR,HPGD,IFNG (includes EG:15978),IL6,PPARGC1A,PTGS2                                                                                           | 7  |
| Small Molecule Biochemistry                          | synthesis                        | synthesis of fatty acid                         | 4,87E-05 | ACSM3,CFTR,HPGD,IFNG (includes EG:15978),IL6,PPARGC1A,PTGS2                                                                                           | 7  |
| Hematological System Development and Function        | accumulation                     | accumulation of leukocytes                      | 4,93E-05 | CXCL10,CXCL9,IFNG (includes EG:15978),IL6,MMP8,SELL                                                                                                   | 6  |
| Immune Cell Trafficking                              | accumulation                     | accumulation of leukocytes                      | 4,93E-05 | CXCL10,CXCL9,IFNG (includes EG:15978),IL6,MMP8,SELL                                                                                                   | 6  |
| Inflammatory Response                                | accumulation                     | accumulation of leukocytes                      | 4,93E-05 | CXCL10,CXCL9,IFNG (includes EG:15978),IL6,MMP8,SELL                                                                                                   | 6  |
| Tissue Development                                   | accumulation                     | accumulation of leukocytes                      | 4,93E-05 | CXCL10,CXCL9,IFNG (includes EG:15978),IL6,MMP8,SELL                                                                                                   | 6  |
| Hematological System Development and Function        | function                         | function of lymphocytes                         | 5,21E-05 | CXCL10,CXCR2,IFNG (includes EG:15978),IL6,MS4A1,PTPRC,SELL                                                                                            | 7  |
| Cellular Function and Maintenance                    | function                         | function of lymphocytes                         | 5,21E-05 | CXCL10,CXCR2,IFNG (includes EG:15978),IL6,MS4A1,PTPRC,SELL                                                                                            | 7  |
| Immunological Disease                                | autoimmune thyroid disease       | autoimmune thyroid disease                      | 5,22E-05 | CXCL10,IL6,MS4A1                                                                                                                                      | 3  |
| Endocrine System Disorders                           | autoimmune thyroid disease       | autoimmune thyroid disease                      | 5,22E-05 | CXCL10,IL6,MS4A1                                                                                                                                      | 3  |
| Cellular Movement                                    | chemotaxis                       | chemotaxis of kidney cell lines                 | 5,22E-05 | CAMP (includes EG:12796),CXCL10,CXCR2                                                                                                                 | 3  |
| Renal and Urological System Development and Function | chemotaxis                       | chemotaxis of kidney cell lines                 | 5,22E-05 | CAMP (includes EG:12796),CXCL10,CXCR2                                                                                                                 | 3  |
| Cellular Movement                                    | cell movement                    | cell movement of macrophages                    | 5,26E-05 | CAMP (includes EG:12796),CXCL10,CXCL9,IFNG (includes EG:15978),PTGS2,SELL                                                                             | 6  |
| Hematological System Development and Function        | cell movement                    | cell movement of macrophages                    | 5,26E-05 | CAMP (includes EG:12796),CXCL10,CXCL9,IFNG (includes EG:15978),PTGS2,SELL                                                                             | 6  |
| Immune Cell Trafficking                              | cell movement                    | cell movement of macrophages                    | 5,26E-05 | CAMP (includes EG:12796),CXCL10,CXCL9,IFNG (includes EG:15978),PTGS2,SELL                                                                             | 6  |
| Inflammatory Response                                | cell movement                    | cell movement of macrophages                    | 5,26E-05 | CAMP (includes EG:12796),CXCL10,CXCL9,IFNG (includes EG:15978),PTGS2,SELL                                                                             | 6  |
| Inflammatory Response                                | phagocytosis                     | phagocytosis of cells                           | 5,37E-05 | CAMP (includes EG:12796),CXCL10,IFNG (includes EG:15978),IL6,MARCO,PTPRC                                                                              | 6  |
| Cell-To-Cell Signaling and Interaction               | phagocytosis                     | phagocytosis of cells                           | 5,37E-05 | CAMP (includes EG:12796),CXCL10,IFNG (includes EG:15978),IL6,MARCO,PTPRC                                                                              | 6  |
| Cellular Function and Maintenance                    | phagocytosis                     | phagocytosis of cells                           | 5,37E-05 | CAMP (includes EG:12796),CXCL10,IFNG (includes EG:15978),IL6,MARCO,PTPRC                                                                              | 6  |
| Cellular Function and Maintenance                    | flux                             | flux of ion                                     | 5,85E-05 | CAMP (includes EG:12796),CFTR,CXCL10,IFNG (includes EG:15978),IL6,MS4A1,SCNN1G                                                                        | 7  |
| Molecular Transport                                  | flux                             | flux of ion                                     | 5,85E-05 | CAMP (includes EG:12796),CFTR,CXCL10,IFNG (includes EG:15978),IL6,MS4A1,SCNN1G                                                                        | 7  |
| Hematological System Development and Function        | activation                       | activation of macrophages                       | 6,20E-05 | CAMP (includes EG:12796),CXCL10,IFNG (includes EG:15978),IL6,PTGS2                                                                                    | 5  |
| Immune Cell Trafficking                              | activation                       | activation of macrophages                       | 6,20E-05 | CAMP (includes EG:12796),CXCL10,IFNG (includes EG:15978),IL6,PTGS2                                                                                    | 5  |
| Inflammatory Response                                | activation                       | activation of macrophages                       | 6,20E-05 | CAMP (includes EG:12796),CXCL10,IFNG (includes EG:15978),IL6,PTGS2                                                                                    | 5  |
| Cell-To-Cell Signaling and Interaction               | activation                       | activation of macrophages                       | 6,20E-05 | CAMP (includes EG:12796),CXCL10,IFNG (includes EG:15978),IL6,PTGS2                                                                                    | 5  |
| Lipid Metabolism                                     | conversion                       | conversion of docosahexaenoic acid              | 6,65E-05 | CFTR,PTGS2                                                                                                                                            | 2  |
| Small Molecule Biochemistry                          | conversion                       | conversion of docosahexaenoic acid              | 6,65E-05 | CFTR,PTGS2                                                                                                                                            | 2  |
| Organismal Development                               | formation                        | formation of bile duct                          | 6,65E-05 | FOXA2,IL6                                                                                                                                             | 2  |
| Infectious Disease                                   | hantavirus pulmonary syndrome    | hantavirus pulmonary syndrome                   | 6,65E-05 | IFNG (includes EG:15978),IL6                                                                                                                          | 2  |
| Respiratory Disease                                  | hantavirus pulmonary syndrome    | hantavirus pulmonary syndrome                   | 6,65E-05 | IFNG (includes EG:15978),IL6                                                                                                                          | 2  |
| Connective Tissue Disorders                          | hyperplasia                      | hyperplasia of synovial cells                   | 6,65E-05 | IFNG (includes EG:15978),IL6                                                                                                                          | 2  |
| Cancer                                               | hyperplasia                      | hyperplasia of synovial cells                   | 6,65E-05 | IFNG (includes EG:15978),IL6                                                                                                                          | 2  |
| Cancer                                               | growth                           | growth of tumor                                 | 6,98E-05 | CXCL9,CXCR2,IFNG (includes EG:15978),IL6,MS4A1,PTGS2,SELL                                                                                             | 7  |
| Humoral Immune Response                              | class switching                  | class switching                                 | 7,04E-05 | IFNG (includes EG:15978),IL6,PTGS2,ZC3H12A                                                                                                            | 4  |
| Infectious Disease                                   | sexually transmitted disease     | sexually transmitted disease                    | 7,04E-05 | IFNG (includes EG:15978),IL6,PTGS2,PTPRC                                                                                                              | 4  |
| Lymphoid Tissue Structure and Development            | abnormal morphology              | abnormal morphology of spleen                   | 7,05E-05 | CXCR2,IFNG (includes EG:15978),PTGS2,PTPRC,SELL,ZC3H12A                                                                                               | 6  |
| Organ Morphology                                     | abnormal morphology              | abnormal morphology of spleen                   | 7,05E-05 | CXCR2,IFNG (includes EG:15978),PTGS2,PTPRC,SELL,ZC3H12A                                                                                               | 6  |
| Hematological System Development and Function        | proliferation                    | proliferation of myeloid progenitor cells       | 7,12E-05 | CXCL10,IFNG (includes EG:15978),IL6                                                                                                                   | 3  |
| Lymphoid Tissue Structure and Development            | proliferation                    | proliferation of myeloid progenitor cells       | 7,12E-05 | CXCL10,IFNG (includes EG:15978),IL6                                                                                                                   | 3  |
| Cellular Development                                 | proliferation                    | proliferation of myeloid progenitor cells       | 7,12E-05 | CXCL10,IFNG (includes EG:15978),IL6                                                                                                                   | 3  |
| Hematopoiesis                                        | proliferation                    | proliferation of myeloid progenitor cells       | 7,12E-05 | CXCL10,IFNG (includes EG:15978),IL6                                                                                                                   | 3  |
| Cellular Growth and Proliferation                    | proliferation                    | proliferation of myeloid progenitor cells       | 7,12E-05 | CXCL10,IFNG (includes EG:15978),IL6                                                                                                                   | 3  |
| Nutritional Disease                                  | cachexia                         | cachexia                                        | 7,36E-05 | CFTR,IFNG (includes EG:15978),IL6,PPARGC1A                                                                                                            | 4  |
| Organismal Injury and Abnormalities                  | cachexia                         | cachexia                                        | 7,36E-05 | CFTR,IFNG (includes EG:15978),IL6,PPARGC1A                                                                                                            | 4  |
| Cellular Movement                                    | cell movement                    | cell movement of epithelial cell lines          | 7,70E-05 | CAMP (includes EG:12796),CXCL10,CXCR2,PTGS2                                                                                                           | 4  |
| Hair and Skin Development and Function               | cell movement                    | cell movement of epithelial cell lines          | 7,70E-05 | CAMP (includes EG:12796),CXCL10,CXCR2,PTGS2                                                                                                           | 4  |
| Cellular Movement                                    | chemotaxis                       | chemotaxis of neutrophils                       | 7,79E-05 | CAMP (includes EG:12796),CXCL10,CXCR2,IFNG (includes EG:15978),SELL                                                                                   | 5  |
| Hematological System Development and Function        | chemotaxis                       | chemotaxis of neutrophils                       | 7,79E-05 | CAMP (includes EG:12796),CXCL10,CXCR2,IFNG (includes EG:15978),SELL                                                                                   | 5  |
| Immune Cell Trafficking                              | chemotaxis                       | chemotaxis of neutrophils                       | 7,79E-05 | CAMP (includes EG:12796),CXCL10,CXCR2,IFNG (includes EG:15978),SELL                                                                                   | 5  |
| Inflammatory Response                                | chemotaxis                       | chemotaxis of neutrophils                       | 7,79E-05 | CAMP (includes EG:12796),CXCL10,CXCR2,IFNG (includes EG:15978),SELL                                                                                   | 5  |
| Cell Death and Survival                              | apoptosis                        | apoptosis of oligodendrocytes                   | 7,84E-05 | CXCR2,IFNG (includes EG:15978),PTGS2                                                                                                                  | 3  |
| Cellular Movement                                    | cell movement                    | cell movement of colon cancer cell lines        | 8,06E-05 | CAMP (includes EG:12796),CXCL10,IFNG (includes EG:15978),PTGS2                                                                                        | 4  |
| Cellular Movement                                    | cell movement                    | cell movement of neuroglia                      | 8,06E-05 | CXCL10,CXCL9,CXCR2,IL6                                                                                                                                | 4  |
| Hematological System Development and Function        | proliferation                    | proliferation of myeloid cells                  | 8,06E-05 | CXCL10,IFNG (includes EG:15978),IL6,PTPRC                                                                                                             | 4  |
| Cellular Development                                 | proliferation                    | proliferation of myeloid cells                  | 8,06E-05 | CXCL10,IFNG (includes EG:15978),IL6,PTPRC                                                                                                             | 4  |
| Cellular Growth and Proliferation                    | proliferation                    | proliferation of myeloid cells                  | 8,06E-05 | CXCL10,IFNG (includes EG:15978),IL6,PTPRC                                                                                                             | 4  |
| Cellular Movement                                    | recruitment                      | recruitment of macrophages                      | 8,06E-05 | APOB,CXCL10,CXCR2,IFNG (includes EG:15978)                                                                                                            | 4  |
| Hematological System Development and Function        | recruitment                      | recruitment of macrophages                      | 8,06E-05 | APOB,CXCL10,CXCR2,IFNG (includes EG:15978)                                                                                                            | 4  |
| Immune Cell Trafficking                              | recruitment                      | recruitment of macrophages                      | 8,06E-05 | APOB,CXCL10,CXCR2,IFNG (includes EG:15978)                                                                                                            | 4  |
| Inflammatory Response                                | recruitment                      | recruitment of macrophages                      | 8,06E-05 | APOB,CXCL10,CXCR2,IFNG (includes EG:15978)                                                                                                            | 4  |
| Cell-To-Cell Signaling and Interaction               | recruitment                      | recruitment of macrophages                      | 8,06E-05 | APOB,CXCL10,CXCR2,IFNG (includes EG:15978)                                                                                                            | 4  |
| Organismal Survival                                  | organismal death                 | organismal death                                | 8,20E-05 | ACE2 (includes EG:302668),APOB,CAMP (includes EG:12796),CFTR,CXCL10,CXCL9,CXCR2,FOXA2,IFNG (includes EG:15978),IL6,MARCO,PPARGC1A,PTGS2,PTPRC,ZC3H12A | 15 |
| Hematological System Development and Function        | accumulation                     | accumulation of eosinophils                     | 8,61E-05 | CXCL10,CXCL9,SELL                                                                                                                                     | 3  |
| Immune Cell Trafficking                              | accumulation                     | accumulation of eosinophils                     | 8,61E-05 | CXCL10,CXCL9,SELL                                                                                                                                     | 3  |
| Inflammatory Response                                | accumulation                     | accumulation of eosinophils                     | 8,61E-05 | CXCL10,CXCL9,SELL                                                                                                                                     | 3  |
| Hypersensitivity Response                            | accumulation                     | accumulation of eosinophils                     | 8,61E-05 | CXCL10,CXCL9,SELL                                                                                                                                     | 3  |
| Tissue Development                                   | accumulation                     | accumulation of eosinophils                     | 8,61E-05 | CXCL10,CXCL9,SELL                                                                                                                                     | 3  |
| Lipid Metabolism                                     | synthesis                        | synthesis of steroid                            | 9,12E-05 | APOB,CFTR,CXCL10,IFNG (includes EG:15978),IL6,PPARGC1A                                                                                                | 6  |
| Small Molecule Biochemistry                          | synthesis                        | synthesis of steroid                            | 9,12E-05 | APOB,CFTR,CXCL10,IFNG (includes EG:15978),IL6,PPARGC1A                                                                                                | 6  |
| Vitamin and Mineral Metabolism                       | synthesis                        | synthesis of steroid                            | 9,12E-05 | APOB,CFTR,CXCL10,IFNG (includes EG:15978),IL6,PPARGC1A                                                                                                | 6  |
| Infectious Disease                                   | infection                        | infection by DNA virus                          | 9,18E-05 | CXCL10,CXCL9,CXCR2,PTGS2                                                                                                                              | 4  |
| Hematological System Development and Function        | phagocytosis                     | phagocytosis by macrophages                     | 9,18E-05 | CAMP (includes EG:12796),IFNG (includes EG:15978),MARCO,PTPRC                                                                                         | 4  |
| Inflammatory Response                                | phagocytosis                     | phagocytosis by macrophages                     | 9,18E-05 | CAMP (includes EG:12796),IFNG (includes EG:15978),MARCO,PTPRC                                                                                         | 4  |
| Cell-To-Cell Signaling and Interaction               | phagocytosis                     | phagocytosis by macrophages                     | 9,18E-05 | CAMP (includes EG:12796),IFNG (includes EG:15978),MARCO,PTPRC                                                                                         | 4  |
| Cellular Function and Maintenance                    | phagocytosis                     | phagocytosis by macrophages                     | 9,18E-05 | CAMP (includes EG:12796),IFNG (includes EG:15978),MARCO,PTPRC                                                                                         | 4  |
| Molecular Transport                                  | mobilization                     | mobilization of Ca2+                            | 9,92E-05 | CAMP (includes EG:12796),CXCL10,CXCL9,CXCR2,IFNG (includes EG:15978),PTPRC,SELL                                                                       | 7  |
| Vitamin and Mineral Metabolism                       | mobilization                     | mobilization of Ca2+                            | 9,92E-05 | CAMP (includes EG:12796),CXCL10,CXCL9,CXCR2,IFNG (includes EG:15978),PTPRC,SELL                                                                       | 7  |
| Cell Signaling                                       | mobilization                     | mobilization of Ca2+                            | 9,92E-05 | CAMP (includes EG:12796),CXCL10,CXCL9,CXCR2,IFNG (includes EG:15978),PTPRC,SELL                                                                       | 7  |
| Cell-To-Cell Signaling and Interaction               | activation                       | activation of keratinocytes                     | 9,96E-05 | IFNG (includes EG:15978),TRPV3                                                                                                                        | 2  |
| Hair and Skin Development and Function               | activation                       | activation of keratinocytes                     | 9,96E-05 | IFNG (includes EG:15978),TRPV3                                                                                                                        | 2  |
| Tissue Development                                   | involution                       | delay in involution of mammary gland            | 9,96E-05 | IL6,PTGS2                                                                                                                                             | 2  |
| Organ Morphology                                     | involution                       | delay in involution of mammary gland            | 9,96E-05 | IL6,PTGS2                                                                                                                                             | 2  |
| Reproductive System Development and Function         | involution                       | delay in involution of mammary gland            | 9,96E-05 | IL6,PTGS2                                                                                                                                             | 2  |
| Connective Tissue Disorders                          | experimentally-induced arthritis | experimentally-induced arthritis of ankle joint | 9,96E-05 | IFNG (includes EG:15978),IL6                                                                                                                          | 2  |
| Inflammatory Disease                                 | experimentally-induced arthritis | experimentally-induced arthritis of ankle joint | 9,96E-05 | IFNG (includes EG:15978),IL6                                                                                                                          | 2  |

|                                                       |                                  |                                                      |          |                                                                                                                                 |    |
|-------------------------------------------------------|----------------------------------|------------------------------------------------------|----------|---------------------------------------------------------------------------------------------------------------------------------|----|
| Skeletal and Muscular Disorders                       | experimentally-induced arthritis | experimentally-induced arthritis of ankle joint      | 9,96E-05 | IFNG (includes EG:15978),IL6                                                                                                    | 2  |
| Hematological System Development and Function         | inhibition                       | inhibition of Th17 cells                             | 9,96E-05 | IFNG (includes EG:15978),PTGS2                                                                                                  | 2  |
| Cellular Growth and Proliferation                     | inhibition                       | inhibition of Th17 cells                             | 9,96E-05 | IFNG (includes EG:15978),PTGS2                                                                                                  | 2  |
| Hematological System Development and Function         | activation                       | activation of neutrophils                            | 9,99E-05 | CXCR2,IFNG (includes EG:15978),IL6,SELL                                                                                         | 4  |
| Immune Cell Trafficking                               | activation                       | activation of neutrophils                            | 9,99E-05 | CXCR2,IFNG (includes EG:15978),IL6,SELL                                                                                         | 4  |
| Inflammatory Response                                 | activation                       | activation of neutrophils                            | 9,99E-05 | CXCR2,IFNG (includes EG:15978),IL6,SELL                                                                                         | 4  |
| Cell-To-Cell Signaling and Interaction                | activation                       | activation of neutrophils                            | 9,99E-05 | CXCR2,IFNG (includes EG:15978),IL6,SELL                                                                                         | 4  |
| Cancer                                                | growth                           | growth of malignant tumor                            | 9,99E-05 | CXCL9,CXCR2,IL6,PTGS2                                                                                                           | 4  |
| Hematological System Development and Function         | function                         | function of T lymphocytes                            | 1,02E-04 | CXCL10,CXCR2,IFNG (includes EG:15978),IL6,PTPRC,SELL                                                                            | 6  |
| Cellular Function and Maintenance                     | function                         | function of T lymphocytes                            | 1,02E-04 | CXCL10,CXCR2,IFNG (includes EG:15978),IL6,PTPRC,SELL                                                                            | 6  |
| Cell Death and Survival                               | apoptosis                        | apoptosis of lung cell lines                         | 1,03E-04 | CAMP (includes EG:12796),IFNG (includes EG:15978),PTGS2                                                                         | 3  |
| Cellular Movement                                     | chemoattraction                  | chemoattraction of phagocytes                        | 1,03E-04 | CAMP (includes EG:12796),CXCL10,CXCL9                                                                                           | 3  |
| Hematological System Development and Function         | chemoattraction                  | chemoattraction of phagocytes                        | 1,03E-04 | CAMP (includes EG:12796),CXCL10,CXCL9                                                                                           | 3  |
| Immune Cell Trafficking                               | chemoattraction                  | chemoattraction of phagocytes                        | 1,03E-04 | CAMP (includes EG:12796),CXCL10,CXCL9                                                                                           | 3  |
| Inflammatory Response                                 | chemoattraction                  | chemoattraction of phagocytes                        | 1,03E-04 | CAMP (includes EG:12796),CXCL10,CXCL9                                                                                           | 3  |
| Cell-To-Cell Signaling and Interaction                | chemoattraction                  | chemoattraction of phagocytes                        | 1,03E-04 | CAMP (includes EG:12796),CXCL10,CXCL9                                                                                           | 3  |
| Connective Tissue Development and Function            | formation                        | formation of osteoclasts                             | 1,04E-04 | ChI3/3/ChI34,IFNG (includes EG:15978),IL6,PTGS2                                                                                 | 4  |
| Cellular Growth and Proliferation                     | formation                        | formation of osteoclasts                             | 1,04E-04 | ChI3/3/ChI34,IFNG (includes EG:15978),IL6,PTGS2                                                                                 | 4  |
| Skeletal and Muscular System Development and Function | formation                        | formation of osteoclasts                             | 1,04E-04 | ChI3/3/ChI34,IFNG (includes EG:15978),IL6,PTGS2                                                                                 | 4  |
| Cancer                                                | incidence                        | incidence of tumor                                   | 1,06E-04 | IFNG (includes EG:15978),IL6,MMP8,PPARGC1A,PTGS2,SELL                                                                           | 6  |
| Lipid Metabolism                                      | metabolism                       | steroid metabolism                                   | 1,06E-04 | Akr1c14,APOB,CFTR,CYP2C19,IFNG (includes EG:15978),IL6                                                                          | 6  |
| Small Molecule Biochemistry                           | metabolism                       | steroid metabolism                                   | 1,06E-04 | Akr1c14,APOB,CFTR,CYP2C19,IFNG (includes EG:15978),IL6                                                                          | 6  |
| Vitamin and Mineral Metabolism                        | metabolism                       | steroid metabolism                                   | 1,06E-04 | Akr1c14,APOB,CFTR,CYP2C19,IFNG (includes EG:15978),IL6                                                                          | 6  |
| Inflammatory Disease                                  | hepatitis                        | Hepatitis                                            | 1,07E-04 | APOB,CXCL10,IFNG (includes EG:15978),IL6,PTPRC                                                                                  | 5  |
| Gastrointestinal Disease                              | hepatitis                        | Hepatitis                                            | 1,07E-04 | APOB,CXCL10,IFNG (includes EG:15978),IL6,PTPRC                                                                                  | 5  |
| Hepatic System Disease                                | hepatitis                        | Hepatitis                                            | 1,07E-04 | APOB,CXCL10,IFNG (includes EG:15978),IL6,PTPRC                                                                                  | 5  |
| Cellular Movement                                     | chemotaxis                       | chemotaxis of T lymphocytes                          | 1,09E-04 | CAMP (includes EG:12796),ChI3/3/ChI34,CXCL10,CXCL9                                                                              | 4  |
| Hematological System Development and Function         | chemotaxis                       | chemotaxis of T lymphocytes                          | 1,09E-04 | CAMP (includes EG:12796),ChI3/3/ChI34,CXCL10,CXCL9                                                                              | 4  |
| Immune Cell Trafficking                               | chemotaxis                       | chemotaxis of T lymphocytes                          | 1,09E-04 | CAMP (includes EG:12796),ChI3/3/ChI34,CXCL10,CXCL9                                                                              | 4  |
| Inflammatory Response                                 | chemotaxis                       | chemotaxis of T lymphocytes                          | 1,09E-04 | CAMP (includes EG:12796),ChI3/3/ChI34,CXCL10,CXCL9                                                                              | 4  |
| Cell-mediated Immune Response                         | chemotaxis                       | chemotaxis of T lymphocytes                          | 1,09E-04 | CAMP (includes EG:12796),ChI3/3/ChI34,CXCL10,CXCL9                                                                              | 4  |
| Infectious Disease                                    | endotoxemia                      | endotoxemia                                          | 1,09E-04 | CAMP (includes EG:12796),IFNG (includes EG:15978),IL6,PTGS2                                                                     | 4  |
| Hematological Disease                                 | endotoxemia                      | endotoxemia                                          | 1,09E-04 | CAMP (includes EG:12796),IFNG (includes EG:15978),IL6,PTGS2                                                                     | 4  |
| Inflammatory Response                                 | immune response                  | immune response of T lymphocytes                     | 1,09E-04 | CAMP (includes EG:12796),IFNG (includes EG:15978),IL6,PTPRC                                                                     | 4  |
| Cell-To-Cell Signaling and Interaction                | immune response                  | immune response of T lymphocytes                     | 1,09E-04 | CAMP (includes EG:12796),IFNG (includes EG:15978),IL6,PTPRC                                                                     | 4  |
| Molecular Transport                                   | quantity                         | quantity of Ca2+                                     | 1,09E-04 | CXCL10,CXCL9,CXCR2,IFNG (includes EG:15978),IL6,PTGS2,PTPRC,SELL                                                                | 8  |
| Vitamin and Mineral Metabolism                        | quantity                         | quantity of Ca2+                                     | 1,09E-04 | CXCL10,CXCL9,CXCR2,IFNG (includes EG:15978),IL6,PTGS2,PTPRC,SELL                                                                | 8  |
| Cell Signaling                                        | quantity                         | quantity of Ca2+                                     | 1,09E-04 | CXCL10,CXCL9,CXCR2,IFNG (includes EG:15978),IL6,PTGS2,PTPRC,SELL                                                                | 8  |
| Respiratory Disease                                   | fibrosis                         | fibrosis of lung                                     | 1,10E-04 | CFTR,IFNG (includes EG:15978),IL6,PTGS2,SELL                                                                                    | 5  |
| Inflammatory Disease                                  | fibrosis                         | fibrosis of lung                                     | 1,10E-04 | CFTR,IFNG (includes EG:15978),IL6,PTGS2,SELL                                                                                    | 5  |
| Organismal Injury and Abnormalities                   | fibrosis                         | fibrosis of lung                                     | 1,10E-04 | CFTR,IFNG (includes EG:15978),IL6,PTGS2,SELL                                                                                    | 5  |
| Protein Synthesis                                     | quantity                         | quantity of protein in blood                         | 1,16E-04 | APOB,CXCR2,FABP2,IFNG (includes EG:15978),IL6,PPARGC1A,PTGS2,SELL                                                               | 8  |
| Hematological System Development and Function         | binding                          | binding of lymphocytes                               | 1,22E-04 | CXCL10,CXCL9,IFNG (includes EG:15978),SELL                                                                                      | 4  |
| Cell-To-Cell Signaling and Interaction                | binding                          | binding of lymphocytes                               | 1,22E-04 | CXCL10,CXCL9,IFNG (includes EG:15978),SELL                                                                                      | 4  |
| Cellular Movement                                     | chemotaxis                       | chemotaxis of macrophages                            | 1,22E-04 | CAMP (includes EG:12796),CXCL10,CXCL9,SELL                                                                                      | 4  |
| Hematological System Development and Function         | chemotaxis                       | chemotaxis of macrophages                            | 1,22E-04 | CAMP (includes EG:12796),CXCL10,CXCL9,SELL                                                                                      | 4  |
| Immune Cell Trafficking                               | chemotaxis                       | chemotaxis of macrophages                            | 1,22E-04 | CAMP (includes EG:12796),CXCL10,CXCL9,SELL                                                                                      | 4  |
| Inflammatory Response                                 | chemotaxis                       | chemotaxis of macrophages                            | 1,22E-04 | CAMP (includes EG:12796),CXCL10,CXCL9,SELL                                                                                      | 4  |
| Tissue Development                                    | development                      | lung development                                     | 1,23E-04 | CFTR,FOXA2,IFNG (includes EG:15978),IL6,PPARGC1A,SELL                                                                           | 6  |
| Embryonic Development                                 | development                      | lung development                                     | 1,23E-04 | CFTR,FOXA2,IFNG (includes EG:15978),IL6,PPARGC1A,SELL                                                                           | 6  |
| Organismal Development                                | development                      | lung development                                     | 1,23E-04 | CFTR,FOXA2,IFNG (includes EG:15978),IL6,PPARGC1A,SELL                                                                           | 6  |
| Organ Development                                     | development                      | lung development                                     | 1,23E-04 | CFTR,FOXA2,IFNG (includes EG:15978),IL6,PPARGC1A,SELL                                                                           | 6  |
| Respiratory System Development and Function           | development                      | lung development                                     | 1,23E-04 | CFTR,FOXA2,IFNG (includes EG:15978),IL6,PPARGC1A,SELL                                                                           | 6  |
| Hematological System Development and Function         | accumulation                     | accumulation of lymphocytes                          | 1,27E-04 | CXCL10,IFNG (includes EG:15978),IL6,SELL                                                                                        | 4  |
| Immune Cell Trafficking                               | accumulation                     | accumulation of lymphocytes                          | 1,27E-04 | CXCL10,IFNG (includes EG:15978),IL6,SELL                                                                                        | 4  |
| Inflammatory Response                                 | accumulation                     | accumulation of lymphocytes                          | 1,27E-04 | CXCL10,IFNG (includes EG:15978),IL6,SELL                                                                                        | 4  |
| Tissue Development                                    | accumulation                     | accumulation of lymphocytes                          | 1,27E-04 | CXCL10,IFNG (includes EG:15978),IL6,SELL                                                                                        | 4  |
| Inflammatory Response                                 | immune response                  | immune response of tumor cell lines                  | 1,27E-04 | IFNG (includes EG:15978),IL6,MARCO,MS4A1                                                                                        | 4  |
| Cell-To-Cell Signaling and Interaction                | immune response                  | immune response of tumor cell lines                  | 1,27E-04 | IFNG (includes EG:15978),IL6,MARCO,MS4A1                                                                                        | 4  |
| Cell Morphology                                       | polarization                     | polarization of blood cells                          | 1,27E-04 | CXCL10,CXCL9,IFNG (includes EG:15978),IL6                                                                                       | 4  |
| Organismal Injury and Abnormalities                   | damage                           | damage of liver                                      | 1,28E-04 | CXCL10,CXCR2,IFNG (includes EG:15978),IL6,PTGS2                                                                                 | 5  |
| Gastrointestinal Disease                              | damage                           | damage of liver                                      | 1,28E-04 | CXCL10,CXCR2,IFNG (includes EG:15978),IL6,PTGS2                                                                                 | 5  |
| Hepatic System Disease                                | damage                           | damage of liver                                      | 1,28E-04 | CXCL10,CXCR2,IFNG (includes EG:15978),IL6,PTGS2                                                                                 | 5  |
| Nutritional Disease                                   | obesity                          | obesity                                              | 1,29E-04 | APOB,CXCL10,FABP2,FOXA2,IL6,PPARGC1A,PTGS2                                                                                      | 7  |
| Free Radical Scavenging                               | production                       | production of reactive oxygen species                | 1,29E-04 | CAMP (includes EG:12796),CXCL9,IFNG (includes EG:15978),IL6,MS4A1,PPARGC1A,PTGS2                                                | 8  |
| Hematological System Development and Function         | quantity                         | quantity of T lymphocytes                            | 1,29E-04 | CAMP (includes EG:12796),CXCL10,GPR83,IFNG (includes EG:15978),IL6,PTPRC,SELL,ZC3H12A                                           | 8  |
| Tissue Morphology                                     | quantity                         | quantity of T lymphocytes                            | 1,29E-04 | CAMP (includes EG:12796),CXCL10,GPR83,IFNG (includes EG:15978),IL6,PTPRC,SELL,ZC3H12A                                           | 8  |
| Tissue Morphology                                     | quantity                         | quantity of cells                                    | 1,30E-04 | APOB,CAMP (includes EG:12796),CFTR,CXCL10,CXCR2,GPR83,IFNG (includes EG:15978),IL6,MMP8,MS4A1,PPARGC1A,PTGS2,PTPRC,SELL,ZC3H12A | 15 |
| Free Radical Scavenging                               | synthesis                        | synthesis of reactive oxygen species                 | 1,30E-04 | CAMP (includes EG:12796),CXCL9,IFNG (includes EG:15978),IL6,MS4A1,PPARGC1A,PTGS2,ZC3H12A                                        | 8  |
| Hematological System Development and Function         | quantity                         | quantity of helper T lymphocytes                     | 1,32E-04 | CXCL10,GPR83,IL6,PTPRC,SELL                                                                                                     | 5  |
| Tissue Morphology                                     | quantity                         | quantity of helper T lymphocytes                     | 1,32E-04 | CXCL10,GPR83,IL6,PTPRC,SELL                                                                                                     | 5  |
| Cellular Compromise                                   | depletion                        | depletion of lymphocytes                             | 1,32E-04 | IFNG (includes EG:15978),MS4A1,SELL                                                                                             | 3  |
| Cell Death and Survival                               | cell death                       | cell death of carcinoma cell lines                   | 1,35E-04 | CAMP (includes EG:12796),IFNG (includes EG:15978),IL6,PTGS2,SLC7A11                                                             | 5  |
| Hematological System Development and Function         | accumulation                     | accumulation of TREG cells                           | 1,39E-04 | IFNG (includes EG:15978),IL6                                                                                                    | 2  |
| Immune Cell Trafficking                               | accumulation                     | accumulation of TREG cells                           | 1,39E-04 | IFNG (includes EG:15978),IL6                                                                                                    | 2  |
| Inflammatory Response                                 | accumulation                     | accumulation of TREG cells                           | 1,39E-04 | IFNG (includes EG:15978),IL6                                                                                                    | 2  |
| Tissue Development                                    | accumulation                     | accumulation of TREG cells                           | 1,39E-04 | IFNG (includes EG:15978),IL6                                                                                                    | 2  |
| Endocrine System Development and Function             | activation                       | activation of hypothalamus-pituitary-adrenal axis    | 1,39E-04 | IFNG (includes EG:15978),IL6                                                                                                    | 2  |
| Hematological System Development and Function         | activation                       | activation of monocyte-derived macrophages           | 1,39E-04 | CAMP (includes EG:12796),IFNG (includes EG:15978)                                                                               | 2  |
| Immune Cell Trafficking                               | activation                       | activation of monocyte-derived macrophages           | 1,39E-04 | CAMP (includes EG:12796),IFNG (includes EG:15978)                                                                               | 2  |
| Inflammatory Response                                 | activation                       | activation of monocyte-derived macrophages           | 1,39E-04 | CAMP (includes EG:12796),IFNG (includes EG:15978)                                                                               | 2  |
| Cell-To-Cell Signaling and Interaction                | activation                       | activation of monocyte-derived macrophages           | 1,39E-04 | CAMP (includes EG:12796),IFNG (includes EG:15978)                                                                               | 2  |
| Cellular Movement                                     | attraction                       | attraction of natural killer cells                   | 1,39E-04 | CXCL10,CXCL9                                                                                                                    | 2  |
| Immune Cell Trafficking                               | attraction                       | attraction of natural killer cells                   | 1,39E-04 | CXCL10,CXCL9                                                                                                                    | 2  |
| Cell-To-Cell Signaling and Interaction                | attraction                       | attraction of natural killer cells                   | 1,39E-04 | CXCL10,CXCL9                                                                                                                    | 2  |
| Small Molecule Biochemistry                           | incorporation                    | incorporation of guanosine 5'-O-(3-thiotriphosphate) | 1,39E-04 | CXCL10,CXCL9                                                                                                                    | 2  |
| Cell Signaling                                        | incorporation                    | incorporation of guanosine 5'-O-(3-thiotriphosphate) | 1,39E-04 | CXCL10,CXCL9                                                                                                                    | 2  |
| Nucleic Acid Metabolism                               | incorporation                    | incorporation of guanosine 5'-O-(3-thiotriphosphate) | 1,39E-04 | CXCL10,CXCL9                                                                                                                    | 2  |
| Cell-To-Cell Signaling and Interaction                | stimulation                      | stimulation of hepatoma cell lines                   | 1,39E-04 | IFNG (includes EG:15978),IL6                                                                                                    | 2  |

|                                                       |                          |                                               |          |                                                                                                                             |    |
|-------------------------------------------------------|--------------------------|-----------------------------------------------|----------|-----------------------------------------------------------------------------------------------------------------------------|----|
| Cellular Growth and Proliferation                     | stimulation              | stimulation of hepatoma cell lines            | 1.39E-04 | IFNG (includes EG:15978),IL6                                                                                                | 2  |
| Cardiovascular System Development and Function        | vascularization          | vascularization of hindlimb                   | 1.39E-04 | CAMP (includes EG:12796),PTGS2                                                                                              | 2  |
| Organismal Development                                | vascularization          | vascularization of hindlimb                   | 1.39E-04 | CAMP (includes EG:12796),PTGS2                                                                                              | 2  |
| Lipid Metabolism                                      | phospholipid flip-flop   | phospholipid flip-flop of phosphatidylserine  | 1.43E-04 | CAMP (includes EG:12796),IFNG (includes EG:15978),PTGS2                                                                     | 3  |
| Small Molecule Biochemistry                           | phospholipid flip-flop   | phospholipid flip-flop of phosphatidylserine  | 1.43E-04 | CAMP (includes EG:12796),IFNG (includes EG:15978),PTGS2                                                                     | 3  |
| Hematological System Development and Function         | adhesion                 | adhesion of granulocytes                      | 1.43E-04 | CXCR2,IFNG (includes EG:15978),IL6,SELL                                                                                     | 4  |
| Immune Cell Trafficking                               | adhesion                 | adhesion of granulocytes                      | 1.43E-04 | CXCR2,IFNG (includes EG:15978),IL6,SELL                                                                                     | 4  |
| Cell-To-Cell Signaling and Interaction                | adhesion                 | adhesion of granulocytes                      | 1.43E-04 | CXCR2,IFNG (includes EG:15978),IL6,SELL                                                                                     | 4  |
| Tissue Development                                    | adhesion                 | adhesion of granulocytes                      | 1.43E-04 | CXCR2,IFNG (includes EG:15978),IL6,SELL                                                                                     | 4  |
| Lipid Metabolism                                      | quantity                 | quantity of sphingolipid                      | 1.43E-04 | ACER1,CFTR,IFNG (includes EG:15978),IL6                                                                                     | 4  |
| Small Molecule Biochemistry                           | quantity                 | quantity of sphingolipid                      | 1.43E-04 | ACER1,CFTR,IFNG (includes EG:15978),IL6                                                                                     | 4  |
| Molecular Transport                                   | quantity                 | quantity of sphingolipid                      | 1.43E-04 | ACER1,CFTR,IFNG (includes EG:15978),IL6                                                                                     | 4  |
| Hematological System Development and Function         | activation               | activation of dendritic cells                 | 1.48E-04 | CAMP (includes EG:12796),FOXA2,IFNG (includes EG:15978),IL6                                                                 | 4  |
| Immune Cell Trafficking                               | activation               | activation of dendritic cells                 | 1.48E-04 | CAMP (includes EG:12796),FOXA2,IFNG (includes EG:15978),IL6                                                                 | 4  |
| Inflammatory Response                                 | activation               | activation of dendritic cells                 | 1.48E-04 | CAMP (includes EG:12796),FOXA2,IFNG (includes EG:15978),IL6                                                                 | 4  |
| Cell-To-Cell Signaling and Interaction                | activation               | activation of dendritic cells                 | 1.48E-04 | CAMP (includes EG:12796),FOXA2,IFNG (includes EG:15978),IL6                                                                 | 4  |
| Inflammatory Response                                 | fever                    | fever                                         | 1.66E-04 | IFNG (includes EG:15978),IL6,PTGS2                                                                                          | 3  |
| Organismal Functions                                  | fever                    | fever                                         | 1.66E-04 | IFNG (includes EG:15978),IL6,PTGS2                                                                                          | 3  |
| Infectious Disease                                    | mycosis                  | mycosis                                       | 1.66E-04 | CXCR2,IFNG (includes EG:15978),IL6                                                                                          | 3  |
| Cardiovascular Disease                                | congestive heart failure | congestive heart failure                      | 1.66E-04 | ACE2 (includes EG:302668),HPGD,IL6,PPARGC1A                                                                                 | 4  |
| Neurological Disease                                  | demyelination            | demyelination                                 | 1.66E-04 | CXCL10,IFNG (includes EG:15978),IL6,PTGS2                                                                                   | 4  |
| Cell-To-Cell Signaling and Interaction                | activation               | activation of astrocytes                      | 1.78E-04 | IFNG (includes EG:15978),IL6,PTGS2                                                                                          | 3  |
| Nervous System Development and Function               | activation               | activation of astrocytes                      | 1.78E-04 | IFNG (includes EG:15978),IL6,PTGS2                                                                                          | 3  |
| Cellular Movement                                     | cell movement            | cell movement of bone marrow cells            | 1.78E-04 | ChI3/ChI34,IFNG (includes EG:15978),IL6                                                                                     | 3  |
| Immune Cell Trafficking                               | cell movement            | cell movement of bone marrow cells            | 1.78E-04 | ChI3/ChI34,IFNG (includes EG:15978),IL6                                                                                     | 3  |
| Inflammatory Response                                 | cell movement            | cell movement of bone marrow cells            | 1.78E-04 | ChI3/ChI34,IFNG (includes EG:15978),IL6                                                                                     | 3  |
| Hematopoiesis                                         | cell movement            | cell movement of bone marrow cells            | 1.78E-04 | ChI3/ChI34,IFNG (includes EG:15978),IL6                                                                                     | 3  |
| Lipid Metabolism                                      | incorporation            | incorporation of lipid                        | 1.78E-04 | ACER1,CFTR,FABP2                                                                                                            | 3  |
| Small Molecule Biochemistry                           | incorporation            | incorporation of lipid                        | 1.78E-04 | ACER1,CFTR,FABP2                                                                                                            | 3  |
| Hematological System Development and Function         | phagocytosis             | phagocytosis of neutrophils                   | 1.78E-04 | CAMP (includes EG:12796),CXCL10,IFNG (includes EG:15978)                                                                    | 3  |
| Inflammatory Response                                 | phagocytosis             | phagocytosis of neutrophils                   | 1.78E-04 | CAMP (includes EG:12796),CXCL10,IFNG (includes EG:15978)                                                                    | 3  |
| Cell-To-Cell Signaling and Interaction                | phagocytosis             | phagocytosis of neutrophils                   | 1.78E-04 | CAMP (includes EG:12796),CXCL10,IFNG (includes EG:15978)                                                                    | 3  |
| Cellular Function and Maintenance                     | phagocytosis             | phagocytosis of neutrophils                   | 1.78E-04 | CAMP (includes EG:12796),CXCL10,IFNG (includes EG:15978)                                                                    | 3  |
| Lipid Metabolism                                      | concentration            | concentration of phospholipid                 | 1.79E-04 | CFTR,FOXA2,IFNG (includes EG:15978),IL6,PTGS2                                                                               | 5  |
| Small Molecule Biochemistry                           | concentration            | concentration of phospholipid                 | 1.79E-04 | CFTR,FOXA2,IFNG (includes EG:15978),IL6,PTGS2                                                                               | 5  |
| Molecular Transport                                   | concentration            | concentration of phospholipid                 | 1.79E-04 | CFTR,FOXA2,IFNG (includes EG:15978),IL6,PTGS2                                                                               | 5  |
| Cardiovascular System Development and Function        | development              | development of cardiovascular system          | 1.81E-04 | ACE2 (includes EG:302668),APOB,CAMP (includes EG:12796),CXCL10,CXCR2,FOXA2,IFNG (includes EG:15978),IL6,PPARGC1A,PTGS2,SELL | 11 |
| Cellular Movement                                     | attraction               | attraction of memory T lymphocytes            | 1.85E-04 | CXCL10,CXCL9                                                                                                                | 2  |
| Hematological System Development and Function         | attraction               | attraction of memory T lymphocytes            | 1.85E-04 | CXCL10,CXCL9                                                                                                                | 2  |
| Immune Cell Trafficking                               | attraction               | attraction of memory T lymphocytes            | 1.85E-04 | CXCL10,CXCL9                                                                                                                | 2  |
| Cell-To-Cell Signaling and Interaction                | attraction               | attraction of memory T lymphocytes            | 1.85E-04 | CXCL10,CXCL9                                                                                                                | 2  |
| Cell Death and Survival                               | cell death               | cell death of dermal fibroblasts              | 1.85E-04 | CAMP (includes EG:12796),IFNG (includes EG:15978)                                                                           | 2  |
| Cell Death and Survival                               | cell viability           | cell viability of peripheral blood leukocytes | 1.85E-04 | APOB,IL6                                                                                                                    | 2  |
| Lipid Metabolism                                      | concentration            | concentration of palmitic acid                | 1.85E-04 | PPARGC1A,PTGS2                                                                                                              | 2  |
| Small Molecule Biochemistry                           | concentration            | concentration of palmitic acid                | 1.85E-04 | PPARGC1A,PTGS2                                                                                                              | 2  |
| Molecular Transport                                   | concentration            | concentration of palmitic acid                | 1.85E-04 | PPARGC1A,PTGS2                                                                                                              | 2  |
| Cellular Growth and Proliferation                     | cystostasis              | cystostasis of melanoma cell lines            | 1.85E-04 | IFNG (includes EG:15978),IL6                                                                                                | 2  |
| Tissue Development                                    | fibrogenesis             | fibrogenesis of liver                         | 1.85E-04 | IFNG (includes EG:15978),IL6                                                                                                | 2  |
| Embryonic Development                                 | fibrogenesis             | fibrogenesis of liver                         | 1.85E-04 | IFNG (includes EG:15978),IL6                                                                                                | 2  |
| Organismal Development                                | fibrogenesis             | fibrogenesis of liver                         | 1.85E-04 | IFNG (includes EG:15978),IL6                                                                                                | 2  |
| Organ Development                                     | fibrogenesis             | fibrogenesis of liver                         | 1.85E-04 | IFNG (includes EG:15978),IL6                                                                                                | 2  |
| Cellular Assembly and Organization                    | fibrogenesis             | fibrogenesis of liver                         | 1.85E-04 | IFNG (includes EG:15978),IL6                                                                                                | 2  |
| Digestive System Development and Function             | fibrogenesis             | fibrogenesis of liver                         | 1.85E-04 | IFNG (includes EG:15978),IL6                                                                                                | 2  |
| Hepatic System Development and Function               | fibrogenesis             | fibrogenesis of liver                         | 1.85E-04 | IFNG (includes EG:15978),IL6                                                                                                | 2  |
| Cellular Movement                                     | invasion                 | invasion of macrophages                       | 1.85E-04 | CXCL10,IFNG (includes EG:15978)                                                                                             | 2  |
| Immune Cell Trafficking                               | invasion                 | invasion of macrophages                       | 1.85E-04 | CXCL10,IFNG (includes EG:15978)                                                                                             | 2  |
| Inflammatory Response                                 | invasion                 | invasion of macrophages                       | 1.85E-04 | CXCL10,IFNG (includes EG:15978)                                                                                             | 2  |
| Cellular Movement                                     | localization             | localization of T lymphocytes                 | 1.85E-04 | IFNG (includes EG:15978),IL6                                                                                                | 2  |
| Hematological System Development and Function         | localization             | localization of T lymphocytes                 | 1.85E-04 | IFNG (includes EG:15978),IL6                                                                                                | 2  |
| Immune Cell Trafficking                               | localization             | localization of T lymphocytes                 | 1.85E-04 | IFNG (includes EG:15978),IL6                                                                                                | 2  |
| Inflammatory Response                                 | localization             | localization of T lymphocytes                 | 1.85E-04 | IFNG (includes EG:15978),IL6                                                                                                | 2  |
| Cellular Function and Maintenance                     | localization             | localization of T lymphocytes                 | 1.85E-04 | IFNG (includes EG:15978),IL6                                                                                                | 2  |
| Cell-To-Cell Signaling and Interaction                | permeability             | permeability of tight junctions               | 1.85E-04 | IFNG (includes EG:15978),IL6                                                                                                | 2  |
| Cell Morphology                                       | permeability             | permeability of tight junctions               | 1.85E-04 | IFNG (includes EG:15978),IL6                                                                                                | 2  |
| Cellular Assembly and Organization                    | permeability             | permeability of tight junctions               | 1.85E-04 | IFNG (includes EG:15978),IL6                                                                                                | 2  |
| Hematological System Development and Function         | stimulation              | stimulation of monocytes                      | 1.85E-04 | IFNG (includes EG:15978),IL6                                                                                                | 2  |
| Inflammatory Response                                 | stimulation              | stimulation of monocytes                      | 1.85E-04 | IFNG (includes EG:15978),IL6                                                                                                | 2  |
| Cell-To-Cell Signaling and Interaction                | stimulation              | stimulation of monocytes                      | 1.85E-04 | IFNG (includes EG:15978),IL6                                                                                                | 2  |
| Cellular Growth and Proliferation                     | stimulation              | stimulation of monocytes                      | 1.85E-04 | IFNG (includes EG:15978),IL6                                                                                                | 2  |
| Cell-To-Cell Signaling and Interaction                | stimulation              | stimulation of smooth muscle cells            | 1.85E-04 | IFNG (includes EG:15978),IL6                                                                                                | 2  |
| Cellular Growth and Proliferation                     | stimulation              | stimulation of smooth muscle cells            | 1.85E-04 | IFNG (includes EG:15978),IL6                                                                                                | 2  |
| Skeletal and Muscular System Development and Function | stimulation              | stimulation of smooth muscle cells            | 1.85E-04 | IFNG (includes EG:15978),IL6                                                                                                | 2  |
| Cellular Movement                                     | chemotaxis               | chemotaxis of phagocytes                      | 1.90E-04 | CAMP (includes EG:12796),CXCL10,CXCL9,CXCR2,IFNG (includes EG:15978),SELL                                                   | 6  |
| Hematological System Development and Function         | chemotaxis               | chemotaxis of phagocytes                      | 1.90E-04 | CAMP (includes EG:12796),CXCL10,CXCL9,CXCR2,IFNG (includes EG:15978),SELL                                                   | 6  |
| Immune Cell Trafficking                               | chemotaxis               | chemotaxis of phagocytes                      | 1.90E-04 | CAMP (includes EG:12796),CXCL10,CXCL9,CXCR2,IFNG (includes EG:15978),SELL                                                   | 6  |
| Inflammatory Response                                 | chemotaxis               | chemotaxis of phagocytes                      | 1.90E-04 | CAMP (includes EG:12796),CXCL10,CXCL9,CXCR2,IFNG (includes EG:15978),SELL                                                   | 6  |
| Lipid Metabolism                                      | concentration            | concentration of prostaglandin E2             | 1.91E-04 | HPGD,IFNG (includes EG:15978),PTGS2                                                                                         | 3  |
| Small Molecule Biochemistry                           | concentration            | concentration of prostaglandin E2             | 1.91E-04 | HPGD,IFNG (includes EG:15978),PTGS2                                                                                         | 3  |
| Molecular Transport                                   | concentration            | concentration of prostaglandin E2             | 1.91E-04 | HPGD,IFNG (includes EG:15978),PTGS2                                                                                         | 3  |
| Drug Metabolism                                       | concentration            | concentration of prostaglandin E2             | 1.91E-04 | HPGD,IFNG (includes EG:15978),PTGS2                                                                                         | 3  |
| Hematological Disease                                 | neutrophilia             | neutrophilia                                  | 1.91E-04 | IFNG (includes EG:15978),IL6,SELL                                                                                           | 3  |
| Organismal Injury and Abnormalities                   | neutrophilia             | neutrophilia                                  | 1.91E-04 | IFNG (includes EG:15978),IL6,SELL                                                                                           | 3  |
| Immunological Disease                                 | neutrophilia             | neutrophilia                                  | 1.91E-04 | IFNG (includes EG:15978),IL6,SELL                                                                                           | 3  |
| Respiratory Disease                                   | injury                   | injury of lung                                | 1.91E-04 | CXCR2,IL6,MARCO,PTGS2                                                                                                       | 4  |
| Organismal Injury and Abnormalities                   | injury                   | injury of lung                                | 1.91E-04 | CXCR2,IL6,MARCO,PTGS2                                                                                                       | 4  |
| Hematological Disease                                 | non-Hodgkin's disease    | non-Hodgkin's disease                         | 1.96E-04 | CXCL10,CXCL9,IFNG (includes EG:15978),IL6,MS4A1,SELL                                                                        | 6  |
| Cancer                                                | non-Hodgkin's disease    | non-Hodgkin's disease                         | 1.96E-04 | CXCL10,CXCL9,IFNG (includes EG:15978),IL6,MS4A1,SELL                                                                        | 6  |
| Lipid Metabolism                                      | concentration            | concentration of fatty acid                   | 2.00E-04 | APOB,CFTR,HPGD,IFNG (includes EG:15978),PPARGC1A,PTGS2                                                                      | 3  |
| Small Molecule Biochemistry                           | concentration            | concentration of fatty acid                   | 2.00E-04 | APOB,CFTR,HPGD,IFNG (includes EG:15978),PPARGC1A,PTGS2                                                                      | 6  |

|                                                      |                                 |                                                             |          |                                                                           |   |
|------------------------------------------------------|---------------------------------|-------------------------------------------------------------|----------|---------------------------------------------------------------------------|---|
| Molecular Transport                                  | concentration                   | concentration of fatty acid                                 | 2,00E-04 | APOB,CFTR,HPGD,IFNG (includes EG:15978),PPARGC1A,PTGS2                    | 6 |
| Hematological System Development and Function        | binding                         | binding of neutrophils                                      | 2,19E-04 | CXCL10,CXCR2,SELL                                                         | 3 |
| Immune Cell Trafficking                              | binding                         | binding of neutrophils                                      | 2,19E-04 | CXCL10,CXCR2,SELL                                                         | 3 |
| Inflammatory Response                                | binding                         | binding of neutrophils                                      | 2,19E-04 | CXCL10,CXCR2,SELL                                                         | 3 |
| Cell-To-Cell Signaling and Interaction               | binding                         | binding of neutrophils                                      | 2,19E-04 | CXCL10,CXCR2,SELL                                                         | 3 |
| Tissue Development                                   | binding                         | binding of neutrophils                                      | 2,19E-04 | CXCL10,CXCR2,SELL                                                         | 3 |
| Hematological System Development and Function        | function                        | function of Th1 cells                                       | 2,19E-04 | CXCR2,IFNG (includes EG:15978),IL6                                        | 3 |
| Cellular Function and Maintenance                    | function                        | function of Th1 cells                                       | 2,19E-04 | CXCR2,IFNG (includes EG:15978),IL6                                        | 3 |
| Cellular Movement                                    | influx                          | influx of neutrophils                                       | 2,19E-04 | CXCR2,IL6,MARCO                                                           | 3 |
| Hematological System Development and Function        | influx                          | influx of neutrophils                                       | 2,19E-04 | CXCR2,IL6,MARCO                                                           | 3 |
| Immune Cell Trafficking                              | influx                          | influx of neutrophils                                       | 2,19E-04 | CXCR2,IL6,MARCO                                                           | 3 |
| Inflammatory Response                                | influx                          | influx of neutrophils                                       | 2,19E-04 | CXCR2,IL6,MARCO                                                           | 3 |
| Organismal Injury and Abnormalities                  | injury                          | injury of mice                                              | 2,19E-04 | IFNG (includes EG:15978),IL6,PTGS2                                        | 3 |
| Connective Tissue Development and Function           | proliferation                   | proliferation of hepatic stellate cells                     | 2,19E-04 | IFNG (includes EG:15978),IL6,PTGS2                                        | 3 |
| Cellular Development                                 | proliferation                   | proliferation of hepatic stellate cells                     | 2,19E-04 | IFNG (includes EG:15978),IL6,PTGS2                                        | 3 |
| Cellular Growth and Proliferation                    | proliferation                   | proliferation of hepatic stellate cells                     | 2,19E-04 | IFNG (includes EG:15978),IL6,PTGS2                                        | 3 |
| Hepatic System Development and Function              | proliferation                   | proliferation of hepatic stellate cells                     | 2,19E-04 | IFNG (includes EG:15978),IL6,PTGS2                                        | 3 |
| Hematological System Development and Function        | adhesion                        | adhesion of lymphocytes                                     | 2,19E-04 | CXCL9,IFNG (includes EG:15978),IL6,SELL                                   | 4 |
| Immune Cell Trafficking                              | adhesion                        | adhesion of lymphocytes                                     | 2,19E-04 | CXCL9,IFNG (includes EG:15978),IL6,SELL                                   | 4 |
| Cell-To-Cell Signaling and Interaction               | adhesion                        | adhesion of lymphocytes                                     | 2,19E-04 | CXCL9,IFNG (includes EG:15978),IL6,SELL                                   | 4 |
| Tissue Development                                   | adhesion                        | adhesion of lymphocytes                                     | 2,19E-04 | CXCL9,IFNG (includes EG:15978),IL6,SELL                                   | 4 |
| Dermatological Diseases and Conditions               | plaque psoriasis                | plaque psoriasis                                            | 2,27E-04 | CSTA,CXCL10,CXCL9,IFNG (includes EG:15978)                                | 4 |
| Cellular Movement                                    | chemotaxis                      | chemotaxis of endothelial cells                             | 2,34E-04 | CAMP (includes EG:12796),CXCR2,PTGS2                                      | 3 |
| Cardiovascular System Development and Function       | chemotaxis                      | chemotaxis of endothelial cells                             | 2,34E-04 | CAMP (includes EG:12796),CXCR2,PTGS2                                      | 3 |
| Tissue Development                                   | involution                      | involution                                                  | 2,34E-04 | CFTR,IL6,PTGS2                                                            | 3 |
| Organ Morphology                                     | involution                      | involution                                                  | 2,34E-04 | CFTR,IL6,PTGS2                                                            | 3 |
| Cellular Development                                 | proliferation                   | proliferation of mesangial cells                            | 2,34E-04 | CXCL10,CXCL9,IL6                                                          | 3 |
| Renal and Urological System Development and Function | proliferation                   | proliferation of mesangial cells                            | 2,34E-04 | CXCL10,CXCL9,IL6                                                          | 3 |
| Cellular Growth and Proliferation                    | infiltration                    | infiltration by lymphocytes                                 | 2,35E-04 | CXCL10,IFNG (includes EG:15978),IL6,ZC3H12A                               | 4 |
| Cellular Movement                                    | infiltration                    | infiltration by lymphocytes                                 | 2,35E-04 | CXCL10,IFNG (includes EG:15978),IL6,ZC3H12A                               | 4 |
| Hematological System Development and Function        | infiltration                    | infiltration by lymphocytes                                 | 2,35E-04 | CXCL10,IFNG (includes EG:15978),IL6,ZC3H12A                               | 4 |
| Immune Cell Trafficking                              | infiltration                    | infiltration by lymphocytes                                 | 2,35E-04 | CXCL10,IFNG (includes EG:15978),IL6,ZC3H12A                               | 4 |
| Cell Death and Survival                              | apoptosis                       | apoptosis of cholangiocarcinoma cell lines                  | 2,38E-04 | IFNG (includes EG:15978),IL6                                              | 2 |
| Cell Death and Survival                              | apoptosis                       | apoptosis of chronic lymphocytic leukemia B cells           | 2,38E-04 | IL6,MS4A1                                                                 | 2 |
| Tumor Morphology                                     | apoptosis                       | apoptosis of chronic lymphocytic leukemia B cells           | 2,38E-04 | IL6,MS4A1                                                                 | 2 |
| Cell Death and Survival                              | apoptosis                       | apoptosis of trophoblast cells                              | 2,38E-04 | IFNG (includes EG:15978),IL6                                              | 2 |
| Embryonic Development                                | apoptosis                       | apoptosis of trophoblast cells                              | 2,38E-04 | IFNG (includes EG:15978),IL6                                              | 2 |
| Cell Death and Survival                              | cell death                      | cell death of bronchial epithelial cells                    | 2,38E-04 | CAMP (includes EG:12796),IFNG (includes EG:15978)                         | 2 |
| Cellular Movement                                    | chemoattraction                 | chemoattraction of monocytes                                | 2,38E-04 | CXCL10,CXCL9                                                              | 2 |
| Hematological System Development and Function        | chemoattraction                 | chemoattraction of monocytes                                | 2,38E-04 | CXCL10,CXCL9                                                              | 2 |
| Immune Cell Trafficking                              | chemoattraction                 | chemoattraction of monocytes                                | 2,38E-04 | CXCL10,CXCL9                                                              | 2 |
| Inflammatory Response                                | chemoattraction                 | chemoattraction of monocytes                                | 2,38E-04 | CXCL10,CXCL9                                                              | 2 |
| Cell-To-Cell Signaling and Interaction               | chemoattraction                 | chemoattraction of monocytes                                | 2,38E-04 | CXCL10,CXCL9                                                              | 2 |
| Cellular Movement                                    | chemotaxis                      | chemotaxis of hematopoietic progenitor cells                | 2,38E-04 | CXCL10,CXCL9                                                              | 2 |
| Hematological System Development and Function        | chemotaxis                      | chemotaxis of hematopoietic progenitor cells                | 2,38E-04 | CXCL10,CXCL9                                                              | 2 |
| Hematopoiesis                                        | chemotaxis                      | chemotaxis of hematopoietic progenitor cells                | 2,38E-04 | CXCL10,CXCL9                                                              | 2 |
| Hematological System Development and Function        | colony formation                | colony formation of granulocyte-macrophage progenitor cells | 2,38E-04 | IFNG (includes EG:15978),IL6                                              | 2 |
| Hematopoiesis                                        | colony formation                | colony formation of granulocyte-macrophage progenitor cells | 2,38E-04 | IFNG (includes EG:15978),IL6                                              | 2 |
| Cellular Growth and Proliferation                    | colony formation                | colony formation of granulocyte-macrophage progenitor cells | 2,38E-04 | IFNG (includes EG:15978),IL6                                              | 2 |
| Organismal Functions                                 | healing                         | delay in healing                                            | 2,38E-04 | IL6,PTGS2                                                                 | 2 |
| Hematological System Development and Function        | generation                      | generation of naive T lymphocytes                           | 2,38E-04 | IFNG (includes EG:15978),IL6                                              | 2 |
| Tissue Development                                   | generation                      | generation of naive T lymphocytes                           | 2,38E-04 | IFNG (includes EG:15978),IL6                                              | 2 |
| Cellular Growth and Proliferation                    | generation                      | generation of naive T lymphocytes                           | 2,38E-04 | IFNG (includes EG:15978),IL6                                              | 2 |
| Infectious Disease                                   | infection                       | infection by Human cytomegalovirus                          | 2,38E-04 | CXCL10,CXCL9                                                              | 2 |
| Infectious Disease                                   | infection                       | infection by human herpesvirus 4                            | 2,38E-04 | CXCL10,CXCL9                                                              | 2 |
| Inflammatory Response                                | pulmonary interstitial fibrosis | pulmonary interstitial fibrosis                             | 2,38E-04 | CFTR,PTGS2                                                                | 2 |
| Respiratory Disease                                  | pulmonary interstitial fibrosis | pulmonary interstitial fibrosis                             | 2,38E-04 | CFTR,PTGS2                                                                | 2 |
| Connective Tissue Disorders                          | pulmonary interstitial fibrosis | pulmonary interstitial fibrosis                             | 2,38E-04 | CFTR,PTGS2                                                                | 2 |
| Inflammatory Disease                                 | pulmonary interstitial fibrosis | pulmonary interstitial fibrosis                             | 2,38E-04 | CFTR,PTGS2                                                                | 2 |
| Organismal Injury and Abnormalities                  | pulmonary interstitial fibrosis | pulmonary interstitial fibrosis                             | 2,38E-04 | CFTR,PTGS2                                                                | 2 |
| Tissue Morphology                                    | quantity                        | quantity of endocrine cell lines                            | 2,38E-04 | IFNG (includes EG:15978),IL6                                              | 2 |
| Endocrine System Development and Function            | quantity                        | quantity of endocrine cell lines                            | 2,38E-04 | IFNG (includes EG:15978),IL6                                              | 2 |
| Hematological System Development and Function        | regulation                      | regulation of antigen presenting cells                      | 2,38E-04 | IFNG (includes EG:15978),IL6                                              | 2 |
| Cellular Function and Maintenance                    | regulation                      | regulation of antigen presenting cells                      | 2,38E-04 | IFNG (includes EG:15978),IL6                                              | 2 |
| Cell-To-Cell Signaling and Interaction               | communication                   | communication of cells                                      | 2,38E-04 | CAMP (includes EG:12796),CFTR,CXCL10,CXCL9,IFNG (includes EG:15978),IL6   | 6 |
| Hematological System Development and Function        | quantity                        | quantity of neutrophils                                     | 2,39E-04 | CXCR2,IFNG (includes EG:15978),IL6,MMP8,SELL                              | 5 |
| Inflammatory Response                                | quantity                        | quantity of neutrophils                                     | 2,39E-04 | CXCR2,IFNG (includes EG:15978),IL6,MMP8,SELL                              | 5 |
| Tissue Morphology                                    | quantity                        | quantity of neutrophils                                     | 2,39E-04 | CXCR2,IFNG (includes EG:15978),IL6,MMP8,SELL                              | 5 |
| Hematological Disease                                | lymphomagenesis                 | lymphomagenesis                                             | 2,41E-04 | CXCL10,CXCL9,IFNG (includes EG:15978),IL6,MS4A1,PTPRC,SELL                | 7 |
| Cancer                                               | lymphomagenesis                 | lymphomagenesis                                             | 2,41E-04 | CXCL10,CXCL9,IFNG (includes EG:15978),IL6,MS4A1,PTPRC,SELL                | 7 |
| Cellular Movement                                    | localization                    | localization of cells                                       | 2,49E-04 | CAMP (includes EG:12796),IFNG (includes EG:15978),IL6                     | 3 |
| Cellular Function and Maintenance                    | localization                    | localization of cells                                       | 2,49E-04 | CAMP (includes EG:12796),IFNG (includes EG:15978),IL6                     | 3 |
| Cell-To-Cell Signaling and Interaction               | binding                         | binding of endothelial cells                                | 2,50E-04 | CXCR2,IFNG (includes EG:15978),IL6,SELL                                   | 4 |
| Cardiovascular System Development and Function       | binding                         | binding of endothelial cells                                | 2,50E-04 | CXCR2,IFNG (includes EG:15978),IL6,SELL                                   | 4 |
| Cellular Development                                 | proliferation                   | proliferation of neuroglia                                  | 2,50E-04 | CXCR2,IFNG (includes EG:15978),IL6,PTPRC                                  | 4 |
| Cellular Growth and Proliferation                    | proliferation                   | proliferation of neuroglia                                  | 2,50E-04 | CXCR2,IFNG (includes EG:15978),IL6,PTPRC                                  | 4 |
| Nervous System Development and Function              | proliferation                   | proliferation of neuroglia                                  | 2,50E-04 | CXCR2,IFNG (includes EG:15978),IL6,PTPRC                                  | 4 |
| Cell Morphology                                      | shape change                    | shape change of connective tissue cells                     | 2,66E-04 | CXCR2,IFNG (includes EG:15978),IL6                                        | 3 |
| Respiratory Disease                                  | interstitial lung disease       | interstitial lung disease                                   | 2,67E-04 | CFTR,IFNG (includes EG:15978),MS4A1,PTGS2                                 | 4 |
| Connective Tissue Disorders                          | interstitial lung disease       | interstitial lung disease                                   | 2,67E-04 | CFTR,IFNG (includes EG:15978),MS4A1,PTGS2                                 | 4 |
| Cancer                                               | hyperplasia                     | hyperplasia                                                 | 2,73E-04 | CFTR,FOXK2,SPR3,IFNG (includes EG:15978),IL6,PTGS2,PTPRC,SELL             | 8 |
| Connective Tissue Disorders                          | rheumatoid arthritis            | rheumatoid arthritis                                        | 2,79E-04 | CXCL10,CXCL9,CXCR2,IFNG (includes EG:15978),IL6,MS4A1,PTGS2,PTPRC,SLC7A11 | 9 |
| Inflammatory Disease                                 | rheumatoid arthritis            | rheumatoid arthritis                                        | 2,79E-04 | CXCL10,CXCL9,CXCR2,IFNG (includes EG:15978),IL6,MS4A1,PTGS2,PTPRC,SLC7A11 | 9 |
| Skeletal and Muscular Disorders                      | rheumatoid arthritis            | rheumatoid arthritis                                        | 2,79E-04 | CXCL10,CXCL9,CXCR2,IFNG (includes EG:15978),IL6,MS4A1,PTGS2,PTPRC,SLC7A11 | 9 |
| Immunological Disease                                | rheumatoid arthritis            | rheumatoid arthritis                                        | 2,79E-04 | CXCL10,CXCL9,CXCR2,IFNG (includes EG:15978),IL6,MS4A1,PTGS2,PTPRC,SLC7A11 | 9 |
| Gene Expression                                      | induction                       | induction of RNA                                            | 2,82E-04 | IFNG (includes EG:15978),IL6,PTPRC                                        | 3 |
| Hematological System Development and Function        | inhibition                      | inhibition of T lymphocytes                                 | 2,82E-04 | IFNG (includes EG:15978),IL6,PTGS2                                        | 3 |
| Cellular Growth and Proliferation                    | inhibition                      | inhibition of T lymphocytes                                 | 2,82E-04 | IFNG (includes EG:15978),IL6,PTGS2                                        | 3 |
| Inflammatory Response                                | phagocytosis                    | phagocytosis of tumor cell lines                            | 2,82E-04 | IFNG (includes EG:15978),IL6,MARCO                                        | 3 |

|                                                       |                                           |                                                    |          |                                                                                            |   |
|-------------------------------------------------------|-------------------------------------------|----------------------------------------------------|----------|--------------------------------------------------------------------------------------------|---|
| Cell-To-Cell Signaling and Interaction                | phagocytosis                              | phagocytosis of tumor cell lines                   | 2,82E-04 | IFNG (includes EG:15978),IL6,MARCO                                                         | 3 |
| Cellular Function and Maintenance                     | phagocytosis                              | phagocytosis of tumor cell lines                   | 2,82E-04 | IFNG (includes EG:15978),IL6,MARCO                                                         | 3 |
| Organismal Injury and Abnormalities                   | injury                                    | injury of liver                                    | 2,94E-04 | CXCL10,CXCR2,IFNG (includes EG:15978),IL6                                                  | 4 |
| Gastrointestinal Disease                              | injury                                    | injury of liver                                    | 2,94E-04 | CXCL10,CXCR2,IFNG (includes EG:15978),IL6                                                  | 4 |
| Hepatic System Disease                                | injury                                    | injury of liver                                    | 2,94E-04 | CXCL10,CXCR2,IFNG (includes EG:15978),IL6                                                  | 4 |
| Tissue Morphology                                     | abnormal morphology                       | abnormal morphology of cervical lymph node         | 2,97E-04 | CXCR2,SELL                                                                                 | 2 |
| Lymphoid Tissue Structure and Development             | abnormal morphology                       | abnormal morphology of cervical lymph node         | 2,97E-04 | CXCR2,SELL                                                                                 | 2 |
| Organ Morphology                                      | abnormal morphology                       | abnormal morphology of cervical lymph node         | 2,97E-04 | CXCR2,SELL                                                                                 | 2 |
| Small Molecule Biochemistry                           | binding                                   | binding of proteoglycan                            | 2,97E-04 | CXCL10,IFNG (includes EG:15978)                                                            | 2 |
| Carbohydrate Metabolism                               | binding                                   | binding of proteoglycan                            | 2,97E-04 | CXCL10,IFNG (includes EG:15978)                                                            | 2 |
| Antimicrobial Response                                | clearance                                 | clearance of Influenza virus                       | 2,97E-04 | IFNG (includes EG:15978),IL6                                                               | 2 |
| Hematological System Development and Function         | detachment                                | detachment of leukocytes                           | 2,97E-04 | PTPRC,SELL                                                                                 | 2 |
| Immune Cell Trafficking                               | detachment                                | detachment of leukocytes                           | 2,97E-04 | PTPRC,SELL                                                                                 | 2 |
| Cell-To-Cell Signaling and Interaction                | detachment                                | detachment of leukocytes                           | 2,97E-04 | PTPRC,SELL                                                                                 | 2 |
| Tissue Development                                    | detachment                                | detachment of leukocytes                           | 2,97E-04 | PTPRC,SELL                                                                                 | 2 |
| Hematological System Development and Function         | erythropoiesis                            | erythropoiesis of erythroid progenitor cells       | 2,97E-04 | IFNG (includes EG:15978),IL6                                                               | 2 |
| Cardiovascular System Development and Function        | erythropoiesis                            | erythropoiesis of erythroid progenitor cells       | 2,97E-04 | IFNG (includes EG:15978),IL6                                                               | 2 |
| Tissue Development                                    | erythropoiesis                            | erythropoiesis of erythroid progenitor cells       | 2,97E-04 | IFNG (includes EG:15978),IL6                                                               | 2 |
| Cellular Development                                  | erythropoiesis                            | erythropoiesis of erythroid progenitor cells       | 2,97E-04 | IFNG (includes EG:15978),IL6                                                               | 2 |
| Hematopoiesis                                         | erythropoiesis                            | erythropoiesis of erythroid progenitor cells       | 2,97E-04 | IFNG (includes EG:15978),IL6                                                               | 2 |
| Organismal Development                                | erythropoiesis                            | erythropoiesis of erythroid progenitor cells       | 2,97E-04 | IFNG (includes EG:15978),IL6                                                               | 2 |
| Carbohydrate Metabolism                               | excretion                                 | excretion of carbohydrate                          | 2,97E-04 | IFNG (includes EG:15978),PPARGC1A                                                          | 2 |
| Hematological System Development and Function         | generation                                | generation of Th1 cells                            | 2,97E-04 | IFNG (includes EG:15978),IL6                                                               | 2 |
| Tissue Development                                    | generation                                | generation of Th1 cells                            | 2,97E-04 | IFNG (includes EG:15978),IL6                                                               | 2 |
| Cellular Growth and Proliferation                     | generation                                | generation of Th1 cells                            | 2,97E-04 | IFNG (includes EG:15978),IL6                                                               | 2 |
| Cellular Movement                                     | migration                                 | migration of bone marrow cell lines                | 2,97E-04 | CXCL10,CXCL9                                                                               | 2 |
| Cellular Development                                  | osteoclastogenesis                        | osteoclastogenesis of macrophage cancer cell lines | 2,97E-04 | IFNG (includes EG:15978),IL6                                                               | 2 |
| Skeletal and Muscular System Development and Function | osteoclastogenesis                        | osteoclastogenesis of macrophage cancer cell lines | 2,97E-04 | IFNG (includes EG:15978),IL6                                                               | 2 |
| Cellular Movement                                     | transmigration                            | transmigration of eosinophils                      | 2,97E-04 | CXCL10,CXCL9                                                                               | 2 |
| Hematological System Development and Function         | transmigration                            | transmigration of eosinophils                      | 2,97E-04 | CXCL10,CXCL9                                                                               | 2 |
| Immune Cell Trafficking                               | transmigration                            | transmigration of eosinophils                      | 2,97E-04 | CXCL10,CXCL9                                                                               | 2 |
| Hypersensitivity Response                             | transmigration                            | transmigration of eosinophils                      | 2,97E-04 | CXCL10,CXCL9                                                                               | 2 |
| Hematological System Development and Function         | binding                                   | binding of macrophages                             | 3,00E-04 | IFNG (includes EG:15978),MARCO,PTPRC                                                       | 3 |
| Immune Cell Trafficking                               | binding                                   | binding of macrophages                             | 3,00E-04 | IFNG (includes EG:15978),MARCO,PTPRC                                                       | 3 |
| Inflammatory Response                                 | binding                                   | binding of macrophages                             | 3,00E-04 | IFNG (includes EG:15978),MARCO,PTPRC                                                       | 3 |
| Cell-To-Cell Signaling and Interaction                | binding                                   | binding of macrophages                             | 3,00E-04 | IFNG (includes EG:15978),MARCO,PTPRC                                                       | 3 |
| Tissue Development                                    | binding                                   | binding of macrophages                             | 3,00E-04 | IFNG (includes EG:15978),MARCO,PTPRC                                                       | 3 |
| Cell-To-Cell Signaling and Interaction                | response                                  | response of mononuclear leukocytes                 | 3,01E-04 | CAMP (includes EG:12796),CXCL9,IFNG (includes EG:15978),IL6,PTPRC                          | 5 |
| Cellular Development                                  | differentiation                           | differentiation of keratinocytes                   | 3,03E-04 | CSTA,IFNG (includes EG:15978),IL6,PTGS2                                                    | 4 |
| Hair and Skin Development and Function                | differentiation                           | differentiation of keratinocytes                   | 3,03E-04 | CSTA,IFNG (includes EG:15978),IL6,PTGS2                                                    | 4 |
| Hematological Disease                                 | eosinophilia                              | eosinophilia                                       | 3,03E-04 | Ch13/Ch134,CXCL9,IFNG (includes EG:15978),PPARGC1A                                         | 4 |
| Immunological Disease                                 | eosinophilia                              | eosinophilia                                       | 3,03E-04 | Ch13/Ch134,CXCL9,IFNG (includes EG:15978),PPARGC1A                                         | 4 |
| Lipid Metabolism                                      | steroidogenesis                           | steroidogenesis                                    | 3,33E-04 | APOB,CFTR,CXCL10,IFNG (includes EG:15978),IL6                                              | 5 |
| Small Molecule Biochemistry                           | steroidogenesis                           | steroidogenesis                                    | 3,33E-04 | APOB,CFTR,CXCL10,IFNG (includes EG:15978),IL6                                              | 5 |
| Cellular Movement                                     | cell movement                             | cell movement of epithelial cells                  | 3,42E-04 | CXCL10,IFNG (includes EG:15978),IL6,SELL                                                   | 4 |
| Cellular Movement                                     | infiltration                              | infiltration by macrophages                        | 3,52E-04 | CXCL10,IFNG (includes EG:15978),PTGS2,SELL                                                 | 4 |
| Hematological System Development and Function         | infiltration                              | infiltration by macrophages                        | 3,52E-04 | CXCL10,IFNG (includes EG:15978),PTGS2,SELL                                                 | 4 |
| Immune Cell Trafficking                               | infiltration                              | infiltration by macrophages                        | 3,52E-04 | CXCL10,IFNG (includes EG:15978),PTGS2,SELL                                                 | 4 |
| Inflammatory Response                                 | infiltration                              | infiltration by macrophages                        | 3,52E-04 | CXCL10,IFNG (includes EG:15978),PTGS2,SELL                                                 | 4 |
| Endocrine System Disorders                            | diabetes mellitus                         | diabetes mellitus                                  | 3,58E-04 | APOB,FABP2,FOXA2,IFNG (includes EG:15978),IL6,MS4A1,PTGS2,SELL,SLC7A11                     | 9 |
| Metabolic Disease                                     | diabetes mellitus                         | diabetes mellitus                                  | 3,58E-04 | APOB,FABP2,FOXA2,IFNG (includes EG:15978),IL6,MS4A1,PTGS2,SELL,SLC7A11                     | 9 |
| Gastrointestinal Disease                              | diabetes mellitus                         | diabetes mellitus                                  | 3,58E-04 | APOB,FABP2,FOXA2,IFNG (includes EG:15978),IL6,MS4A1,PTGS2,SELL,SLC7A11                     | 9 |
| Small Molecule Biochemistry                           | diabetes mellitus                         | diabetes mellitus                                  | 3,58E-04 | APOB,FABP2,FOXA2,IFNG (includes EG:15978),IL6,MS4A1,PTGS2,SELL,SLC7A11                     | 9 |
| Cell Signaling                                        | synthesis                                 | synthesis of nitric oxide                          | 3,59E-04 | ACE2 (includes EG:302668),CAMP (includes EG:12796),CFTR,IFNG (includes EG:15978),IL6,PTGS2 | 6 |
| Tissue Development                                    | branching morphogenesis                   | branching morphogenesis of lung                    | 3,62E-04 | ACE2 (includes EG:302668),CAMP (includes EG:12796),CFTR,IFNG (includes EG:15978),IL6,PTGS2 | 6 |
| Organ Morphology                                      | branching morphogenesis                   | branching morphogenesis of lung                    | 3,62E-04 | FOX A2,IL6                                                                                 | 2 |
| Embryonic Development                                 | branching morphogenesis                   | branching morphogenesis of lung                    | 3,62E-04 | FOX A2,IL6                                                                                 | 2 |
| Organismal Development                                | branching morphogenesis                   | branching morphogenesis of lung                    | 3,62E-04 | FOX A2,IL6                                                                                 | 2 |
| Organ Development                                     | branching morphogenesis                   | branching morphogenesis of lung                    | 3,62E-04 | FOX A2,IL6                                                                                 | 2 |
| Respiratory System Development and Function           | branching morphogenesis                   | branching morphogenesis of lung                    | 3,62E-04 | FOX A2,IL6                                                                                 | 2 |
| Small Molecule Biochemistry                           | catabolism                                | catabolism of L-tryptophan                         | 3,62E-04 | IFNG (includes EG:15978),IL6                                                               | 2 |
| Amino Acid Metabolism                                 | catabolism                                | catabolism of L-tryptophan                         | 3,62E-04 | IFNG (includes EG:15978),IL6                                                               | 2 |
| Neurological Disease                                  | demyelination                             | demyelination of cells                             | 3,62E-04 | IFNG (includes EG:15978),IL6                                                               | 2 |
| Cellular Compromise                                   | depletion                                 | depletion of B lymphocytes                         | 3,62E-04 | IFNG (includes EG:15978),MS4A1                                                             | 2 |
| Hematological System Development and Function         | expansion                                 | expansion of Th17 cells                            | 3,62E-04 | IFNG (includes EG:15978),IL6                                                               | 2 |
| Cellular Development                                  | expansion                                 | expansion of Th17 cells                            | 3,62E-04 | IFNG (includes EG:15978),IL6                                                               | 2 |
| Cellular Growth and Proliferation                     | expansion                                 | expansion of Th17 cells                            | 3,62E-04 | IFNG (includes EG:15978),IL6                                                               | 2 |
| Cellular Movement                                     | infiltration                              | infiltration by mast cells                         | 3,62E-04 | CFTR,SELL                                                                                  | 2 |
| Hematological System Development and Function         | infiltration                              | infiltration by mast cells                         | 3,62E-04 | CFTR,SELL                                                                                  | 2 |
| Immune Cell Trafficking                               | infiltration                              | infiltration by mast cells                         | 3,62E-04 | CFTR,SELL                                                                                  | 2 |
| Inflammatory Response                                 | infiltration                              | infiltration by mast cells                         | 3,62E-04 | CFTR,SELL                                                                                  | 2 |
| Hypersensitivity Response                             | infiltration                              | infiltration by mast cells                         | 3,62E-04 | CFTR,SELL                                                                                  | 2 |
| Infectious Disease                                    | replication                               | replication of Coxsackievirus B3                   | 3,62E-04 | IFNG (includes EG:15978),PTPRC                                                             | 2 |
| Hematological System Development and Function         | proliferation                             | proliferation of hematopoietic progenitor cells    | 3,67E-04 | CXCL10,IFNG (includes EG:15978),IL6,PTGS2,PTPRC                                            | 5 |
| Cellular Development                                  | proliferation                             | proliferation of hematopoietic progenitor cells    | 3,67E-04 | CXCL10,IFNG (includes EG:15978),IL6,PTGS2,PTPRC                                            | 5 |
| Hematopoiesis                                         | proliferation                             | proliferation of hematopoietic progenitor cells    | 3,67E-04 | CXCL10,IFNG (includes EG:15978),IL6,PTGS2,PTPRC                                            | 5 |
| Cellular Growth and Proliferation                     | proliferation                             | proliferation of hematopoietic progenitor cells    | 3,67E-04 | CXCL10,IFNG (includes EG:15978),IL6,PTGS2,PTPRC                                            | 5 |
| Tissue Development                                    | aggregation                               | aggregation of cells                               | 3,70E-04 | CXCL10,CXCL9,IL6,PTGS2,PTPRC,SELL                                                          | 6 |
| Cancer                                                | growth                                    | growth of carcinoma                                | 3,77E-04 | CXCR2,IL6,PTGS2                                                                            | 3 |
| Tumor Morphology                                      | regression                                | regression of tumor                                | 3,77E-04 | CXCL10,CXCL9,IFNG (includes EG:15978)                                                      | 3 |
| Cell Death and Survival                               | cytolysis                                 | cytolysis of tumor                                 | 3,89E-04 | CAMP (includes EG:12796),IFNG (includes EG:15978),IL6,MS4A1,PTPRC                          | 5 |
| Inflammatory Disease                                  | experimental autoimmune encephalomyelitis | experimental autoimmune encephalomyelitis          | 3,89E-04 | CXCL10,IFNG (includes EG:15978),IL6,PTPRC,SELL                                             | 5 |
| Immunological Disease                                 | experimental autoimmune encephalomyelitis | experimental autoimmune encephalomyelitis          | 3,89E-04 | CXCL10,IFNG (includes EG:15978),IL6,PTPRC,SELL                                             | 5 |
| Neurological Disease                                  | experimental autoimmune encephalomyelitis | experimental autoimmune encephalomyelitis          | 3,89E-04 | CXCL10,IFNG (includes EG:15978),IL6,PTPRC,SELL                                             | 5 |
| Cell Death and Survival                               | cell death                                | cell death of B lymphocytes                        | 3,95E-04 | IFNG (includes EG:15978),IL6,MS4A1,PTPRC                                                   | 4 |
| Lipid Metabolism                                      | quantity                                  | quantity of polyunsaturated fatty acids            | 3,95E-04 | CFTR,HPGD,IFNG (includes EG:15978),PTGS2                                                   | 4 |
| Small Molecule Biochemistry                           | quantity                                  | quantity of polyunsaturated fatty acids            | 3,95E-04 | CFTR,HPGD,IFNG (includes EG:15978),PTGS2                                                   | 4 |
| Molecular Transport                                   | quantity                                  | quantity of polyunsaturated fatty acids            | 3,95E-04 | CFTR,HPGD,IFNG (includes EG:15978),PTGS2                                                   | 4 |

|                                                       |                           |                                                                            |          |                                                                                                                                               |    |
|-------------------------------------------------------|---------------------------|----------------------------------------------------------------------------|----------|-----------------------------------------------------------------------------------------------------------------------------------------------|----|
| Infectious Disease                                    | hepatitis C               | hepatitis C                                                                | 3,98E-04 | IFNG (includes EG:15978),IL6,PTPRC                                                                                                            | 3  |
| Inflammatory Disease                                  | hepatitis C               | hepatitis C                                                                | 3,98E-04 | IFNG (includes EG:15978),IL6,PTPRC                                                                                                            | 3  |
| Gastrointestinal Disease                              | hepatitis C               | hepatitis C                                                                | 3,98E-04 | IFNG (includes EG:15978),IL6,PTPRC                                                                                                            | 3  |
| Hepatic System Disease                                | hepatitis C               | hepatitis C                                                                | 3,98E-04 | IFNG (includes EG:15978),IL6,PTPRC                                                                                                            | 3  |
| Small Molecule Biochemistry                           | synthesis                 | synthesis of nitrite                                                       | 3,98E-04 | IFNG (includes EG:15978),IL6,ZC3H12A                                                                                                          | 3  |
| Lipid Metabolism                                      | synthesis                 | synthesis of lipid                                                         | 4,12E-04 | ACSM3,APOB,CFTR,CXCL10,HPGD,IFNG (includes EG:15978),IL6,PPARGC1A,PTGS2                                                                       | 9  |
| Small Molecule Biochemistry                           | synthesis                 | synthesis of lipid                                                         | 4,12E-04 | ACSM3,APOB,CFTR,CXCL10,HPGD,IFNG (includes EG:15978),IL6,PPARGC1A,PTGS2                                                                       | 9  |
| Cell-To-Cell Signaling and Interaction                | contact growth inhibition | contact growth inhibition of leukocytes                                    | 4,34E-04 | IFNG (includes EG:15978),PTPRC                                                                                                                | 2  |
| Cellular Growth and Proliferation                     | contact growth inhibition | contact growth inhibition of leukocytes                                    | 4,34E-04 | IFNG (includes EG:15978),PTPRC                                                                                                                | 2  |
| Cell Cycle                                            | contact growth inhibition | contact growth inhibition of leukocytes                                    | 4,34E-04 | IFNG (includes EG:15978),PTPRC                                                                                                                | 2  |
| Lipid Metabolism                                      | conversion                | conversion of arachidonic acid                                             | 4,34E-04 | CFTR,PTGS2                                                                                                                                    | 2  |
| Small Molecule Biochemistry                           | conversion                | conversion of arachidonic acid                                             | 4,34E-04 | CFTR,PTGS2                                                                                                                                    | 2  |
| Cell-To-Cell Signaling and Interaction                | induction                 | induction of tumor cell lines                                              | 4,34E-04 | IFNG (includes EG:15978),IL6                                                                                                                  | 2  |
| Cellular Growth and Proliferation                     | induction                 | induction of tumor cell lines                                              | 4,34E-04 | IFNG (includes EG:15978),IL6                                                                                                                  | 2  |
| Skeletal and Muscular System Development and Function | muscularization           | muscularization                                                            | 4,34E-04 | ACE2 (includes EG:302668),IL6                                                                                                                 | 2  |
| Cell-To-Cell Signaling and Interaction                | stimulation               | stimulation of cancer cells                                                | 4,34E-04 | IFNG (includes EG:15978),IL6                                                                                                                  | 2  |
| Cancer                                                | stimulation               | stimulation of cancer cells                                                | 4,34E-04 | IFNG (includes EG:15978),IL6                                                                                                                  | 2  |
| Cellular Growth and Proliferation                     | stimulation               | stimulation of cancer cells                                                | 4,34E-04 | IFNG (includes EG:15978),IL6                                                                                                                  | 2  |
| Tumor Morphology                                      | stimulation               | stimulation of cancer cells                                                | 4,34E-04 | IFNG (includes EG:15978),IL6                                                                                                                  | 2  |
| Cell-To-Cell Signaling and Interaction                | stimulation               | stimulation of leukemia cell lines                                         | 4,34E-04 | IFNG (includes EG:15978),IL6                                                                                                                  | 2  |
| Cellular Growth and Proliferation                     | stimulation               | stimulation of leukemia cell lines                                         | 4,34E-04 | IFNG (includes EG:15978),IL6                                                                                                                  | 2  |
| Cellular Movement                                     | cell movement             | cell movement of peripheral blood leukocytes                               | 4,42E-04 | CAMP (includes EG:12796),CXCL9,SELL                                                                                                           | 3  |
| Hematological System Development and Function         | cell movement             | cell movement of peripheral blood leukocytes                               | 4,42E-04 | CAMP (includes EG:12796),CXCL9,SELL                                                                                                           | 3  |
| Immune Cell Trafficking                               | cell movement             | cell movement of peripheral blood leukocytes                               | 4,42E-04 | CAMP (includes EG:12796),CXCL9,SELL                                                                                                           | 3  |
| Cardiovascular System Development and Function        | development               | development of blood vessel                                                | 4,62E-04 | ACE2 (includes EG:302668),APOB,CAMP (includes EG:12796),CXCL10,CXCR2,IFNG (includes EG:15978),IL6,PTGS2,SELL                                  | 9  |
| Organismal Development                                | development               | development of blood vessel                                                | 4,62E-04 | ACE2 (includes EG:302668),APOB,CAMP (includes EG:12796),CXCL10,CXCR2,IFNG (includes EG:15978),IL6,PTGS2,SELL                                  | 9  |
| Cell Death and Survival                               | killing                   | killing of bacteria                                                        | 4,65E-04 | CAMP (includes EG:12796),CXCL10,IFNG (includes EG:15978)                                                                                      | 3  |
| Cellular Movement                                     | recruitment               | recruitment of T lymphocytes                                               | 4,65E-04 | CXCL10,CXCL9,IFNG (includes EG:15978)                                                                                                         | 3  |
| Hematological System Development and Function         | recruitment               | recruitment of T lymphocytes                                               | 4,65E-04 | CXCL10,CXCL9,IFNG (includes EG:15978)                                                                                                         | 3  |
| Immune Cell Trafficking                               | recruitment               | recruitment of T lymphocytes                                               | 4,65E-04 | CXCL10,CXCL9,IFNG (includes EG:15978)                                                                                                         | 3  |
| Cell-To-Cell Signaling and Interaction                | recruitment               | recruitment of T lymphocytes                                               | 4,65E-04 | CXCL10,CXCL9,IFNG (includes EG:15978)                                                                                                         | 3  |
| Cell-mediated Immune Response                         | recruitment               | recruitment of T lymphocytes                                               | 4,65E-04 | CXCL10,CXCL9,IFNG (includes EG:15978)                                                                                                         | 3  |
| Connective Tissue Disorders                           | rheumatic disease         | Rheumatic Disease                                                          | 4,67E-04 | CAMP (includes EG:12796),CXCL10,CXCL9,CXCR2,IFNG (includes EG:15978),IL6,MMP8,MS4A1,PTGS2,PTPRC,SLC7A11                                       | 11 |
| Inflammatory Disease                                  | rheumatic disease         | Rheumatic Disease                                                          | 4,67E-04 | CAMP (includes EG:12796),CXCL10,CXCL9,CXCR2,IFNG (includes EG:15978),IL6,MMP8,MS4A1,PTGS2,PTPRC,SLC7A11                                       | 11 |
| Skeletal and Muscular Disorders                       | rheumatic disease         | Rheumatic Disease                                                          | 4,67E-04 | CAMP (includes EG:12796),CXCL10,CXCL9,CXCR2,IFNG (includes EG:15978),IL6,MMP8,MS4A1,PTGS2,PTPRC,SLC7A11                                       | 11 |
| Cellular Growth and Proliferation                     | colony formation          | colony formation of tumor cell lines                                       | 4,68E-04 | FOXA2,HPGD,IFNG (includes EG:15978),IL6,PTGS2                                                                                                 | 5  |
| Cellular Development                                  | maturation                | maturation of leukocytes                                                   | 4,68E-04 | CAMP (includes EG:12796),IFNG (includes EG:15978),IL6,PTGS2,PTPRC                                                                             | 5  |
| Hematopoiesis                                         | maturation                | maturation of leukocytes                                                   | 4,68E-04 | CAMP (includes EG:12796),IFNG (includes EG:15978),IL6,PTGS2,PTPRC                                                                             | 5  |
| Inflammatory Response                                 | pneumonia                 | pneumonia                                                                  | 4,80E-04 | CAMP (includes EG:12796),IFNG (includes EG:15978),MS4A1,PTGS2                                                                                 | 4  |
| Respiratory Disease                                   | pneumonia                 | pneumonia                                                                  | 4,80E-04 | CAMP (includes EG:12796),IFNG (includes EG:15978),MS4A1,PTGS2                                                                                 | 4  |
| Hematological System Development and Function         | stimulation               | stimulation of phagocytes                                                  | 4,89E-04 | CAMP (includes EG:12796),IFNG (includes EG:15978),IL6                                                                                         | 3  |
| Inflammatory Response                                 | stimulation               | stimulation of phagocytes                                                  | 4,89E-04 | CAMP (includes EG:12796),IFNG (includes EG:15978),IL6                                                                                         | 3  |
| Cell-To-Cell Signaling and Interaction                | stimulation               | stimulation of phagocytes                                                  | 4,89E-04 | CAMP (includes EG:12796),IFNG (includes EG:15978),IL6                                                                                         | 3  |
| Cellular Growth and Proliferation                     | stimulation               | stimulation of phagocytes                                                  | 4,89E-04 | CAMP (includes EG:12796),IFNG (includes EG:15978),IL6                                                                                         | 3  |
| Lipid Metabolism                                      | synthesis                 | synthesis of eicosanoid                                                    | 5,03E-04 | CFTR,HPGD,IFNG (includes EG:15978),IL6,PTGS2                                                                                                  | 5  |
| Small Molecule Biochemistry                           | synthesis                 | synthesis of eicosanoid                                                    | 5,03E-04 | CFTR,HPGD,IFNG (includes EG:15978),IL6,PTGS2                                                                                                  | 5  |
| Humoral Immune Response                               | quantity                  | quantity of IgM                                                            | 5,06E-04 | IFNG (includes EG:15978),MARCO,PTGS2,ZC3H12A                                                                                                  | 4  |
| Protein Synthesis                                     | quantity                  | quantity of IgM                                                            | 5,06E-04 | IFNG (includes EG:15978),MARCO,PTGS2,ZC3H12A                                                                                                  | 4  |
| Neurological Disease                                  | damage                    | damage of axons                                                            | 5,12E-04 | IFNG (includes EG:15978),IL6                                                                                                                  | 2  |
| Hematological System Development and Function         | differentiation           | differentiation of bone-marrow-derived monocyte/macrophage precursor cells | 5,12E-04 | IFNG (includes EG:15978),IL6                                                                                                                  | 2  |
| Cellular Development                                  | differentiation           | differentiation of bone-marrow-derived monocyte/macrophage precursor cells | 5,12E-04 | IFNG (includes EG:15978),IL6                                                                                                                  | 2  |
| Hematopoiesis                                         | differentiation           | differentiation of bone-marrow-derived monocyte/macrophage precursor cells | 5,12E-04 | IFNG (includes EG:15978),IL6                                                                                                                  | 2  |
| Organismal Functions                                  | healing                   | healing of bone                                                            | 5,12E-04 | IL6,PTGS2                                                                                                                                     | 2  |
| Respiratory Disease                                   | hyperreactivity           | hyperreactivity of airway                                                  | 5,12E-04 | CXCL10,CXCL9                                                                                                                                  | 2  |
| Organismal Injury and Abnormalities                   | hyperreactivity           | hyperreactivity of airway                                                  | 5,12E-04 | CXCL10,CXCL9                                                                                                                                  | 2  |
| Inflammatory Response                                 | immune response           | immune response of B lymphocytes                                           | 5,12E-04 | IFNG (includes EG:15978),PTPRC                                                                                                                | 2  |
| Cell-To-Cell Signaling and Interaction                | immune response           | immune response of B lymphocytes                                           | 5,12E-04 | IFNG (includes EG:15978),PTPRC                                                                                                                | 2  |
| Humoral Immune Response                               | immune response           | immune response of B lymphocytes                                           | 5,12E-04 | IFNG (includes EG:15978),PTPRC                                                                                                                | 2  |
| Cellular Movement                                     | migration                 | migration of mesangial cells                                               | 5,12E-04 | CXCL10,CXCL9                                                                                                                                  | 2  |
| Renal and Urological System Development and Function  | migration                 | migration of mesangial cells                                               | 5,12E-04 | CXCL10,CXCL9                                                                                                                                  | 2  |
| Cellular Movement                                     | migration                 | migration of plasmacytoid dendritic cells                                  | 5,12E-04 | CXCL10,CXCL9                                                                                                                                  | 2  |
| Hematological System Development and Function         | migration                 | migration of plasmacytoid dendritic cells                                  | 5,12E-04 | CXCL10,CXCL9                                                                                                                                  | 2  |
| Immune Cell Trafficking                               | migration                 | migration of plasmacytoid dendritic cells                                  | 5,12E-04 | CXCL10,CXCL9                                                                                                                                  | 2  |
| Inflammatory Response                                 | migration                 | migration of plasmacytoid dendritic cells                                  | 5,12E-04 | CXCL10,CXCL9                                                                                                                                  | 2  |
| Hematological System Development and Function         | quantity                  | quantity of peripheral T lymphocyte                                        | 5,12E-04 | IL6,PTPRC                                                                                                                                     | 2  |
| Tissue Morphology                                     | quantity                  | quantity of peripheral T lymphocyte                                        | 5,12E-04 | IL6,PTPRC                                                                                                                                     | 2  |
| Lipid Metabolism                                      | quantity                  | quantity of ceramide                                                       | 5,14E-04 | CFTR,IFNG (includes EG:15978),IL6                                                                                                             | 3  |
| Small Molecule Biochemistry                           | quantity                  | quantity of ceramide                                                       | 5,14E-04 | CFTR,IFNG (includes EG:15978),IL6                                                                                                             | 3  |
| Molecular Transport                                   | quantity                  | quantity of ceramide                                                       | 5,14E-04 | CFTR,IFNG (includes EG:15978),IL6                                                                                                             | 3  |
| Hematological System Development and Function         | lymphopoiesis             | lymphopoiesis                                                              | 5,40E-04 | IFNG (includes EG:15978),IL6,PTPRC                                                                                                            | 3  |
| Cellular Development                                  | lymphopoiesis             | lymphopoiesis                                                              | 5,40E-04 | IFNG (includes EG:15978),IL6,PTPRC                                                                                                            | 3  |
| Hematopoiesis                                         | lymphopoiesis             | lymphopoiesis                                                              | 5,40E-04 | IFNG (includes EG:15978),IL6,PTPRC                                                                                                            | 3  |
| Protein Synthesis                                     | quantity                  | quantity of cytokine                                                       | 5,40E-04 | IFNG (includes EG:15978),IL6,PTPRC                                                                                                            | 3  |
| Hematological System Development and Function         | aggregation               | aggregation of blood cells                                                 | 5,50E-04 | CXCR2,FABP2,IFNG (includes EG:15978),IL6,PTGS2                                                                                                | 5  |
| Tissue Development                                    | aggregation               | aggregation of blood cells                                                 | 5,50E-04 | CXCL10,CXCL9,IL6,PTGS2,SELL                                                                                                                   | 5  |
| Lipid Metabolism                                      | synthesis                 | synthesis of prostaglandin E2                                              | 5,62E-04 | CXCL10,CXCL9,IL6,PTGS2,SELL                                                                                                                   | 5  |
| Small Molecule Biochemistry                           | synthesis                 | synthesis of prostaglandin E2                                              | 5,62E-04 | HPGD,IFNG (includes EG:15978),IL6,PTGS2                                                                                                       | 4  |
| Drug Metabolism                                       | synthesis                 | synthesis of prostaglandin E2                                              | 5,62E-04 | HPGD,IFNG (includes EG:15978),IL6,PTGS2                                                                                                       | 4  |
| Inflammatory Response                                 | inflammation              | inflammation of intestine                                                  | 5,79E-04 | HPGD,IFNG (includes EG:15978),IL6,PTGS2                                                                                                       | 4  |
| Infectious Disease                                    | infection                 | Viral Infection                                                            | 5,91E-04 | HPGD,IFNG (includes EG:15978),IL6,MS4A1,PTGS2                                                                                                 | 4  |
| Cell-To-Cell Signaling and Interaction                | activation                | activation of endothelial cells                                            | 5,93E-04 | ACE2 (includes EG:302668),APOB,CAMP (includes EG:12796),CFTR,CXCL10,CXCL9,CXCR2,HPGD,IFNG (includes EG:15978),IL6,PM20D1,PPARGC1A,PTGS2,PTPRC | 14 |
| Cardiovascular System Development and Function        | activation                | activation of endothelial cells                                            | 5,93E-04 | CAMP (includes EG:12796),IFNG (includes EG:15978),IL6                                                                                         | 3  |
| Metabolic Disease                                     | albuminuria               | albuminuria                                                                | 5,93E-04 | IFNG (includes EG:15978),IL6,PTGS2                                                                                                            | 3  |
| Renal and Urological Disease                          | albuminuria               | albuminuria                                                                | 5,93E-04 | IFNG (includes EG:15978),IL6,PTGS2                                                                                                            | 3  |
| Cell Cycle                                            | interphase                | arrest in interphase of melanoma cell lines                                | 5,96E-04 | IFNG (includes EG:15978),IL6                                                                                                                  | 2  |
| Antimicrobial Response                                | clearance                 | clearance of bacteria                                                      | 5,96E-04 | IFNG (includes EG:15978),MARCO                                                                                                                | 2  |
| Cell Death and Survival                               | killing                   | killing of macrophages                                                     | 5,96E-04 | CAMP (includes EG:12796),IFNG (includes EG:15978)                                                                                             | 2  |
| Hematological System Development and Function         | regulation                | regulation of phagocytes                                                   | 5,96E-04 | IFNG (includes EG:15978),IL6                                                                                                                  | 2  |
| Inflammatory Response                                 | regulation                | regulation of phagocytes                                                   | 5,96E-04 | IFNG (includes EG:15978),IL6                                                                                                                  | 2  |



|                                                |                              |                                                       |          |                                                                                                  |    |
|------------------------------------------------|------------------------------|-------------------------------------------------------|----------|--------------------------------------------------------------------------------------------------|----|
| Cellular Function and Maintenance              | regulation                   | regulation of macrophages                             | 5,96E-04 | IFNG (includes EG:15978),IL6                                                                     | 2  |
| Cell-To-Cell Signaling and Interaction         | response                     | response of macrophage cancer cell lines              | 5,96E-04 | IFNG (includes EG:15978),MARCO                                                                   | 2  |
| Metabolic Diseases                             | glucose metabolism disorder  | glucose metabolism disorder                           | 6,05E-04 | APOB,FABP2,FOXO2,IFNG (includes EG:15978),IL6,MS4A1,PPARGC1A,PTGS2,SELL,SLC7A11                  | 10 |
| Connective Tissue Disorders                    | systemic lupus erythematosus | systemic lupus erythematosus                          | 6,07E-04 | CAMP (includes EG:12796),IFNG (includes EG:15978),MMP8,PTPRC                                     | 4  |
| Inflammatory Disease                           | systemic lupus erythematosus | systemic lupus erythematosus                          | 6,07E-04 | CAMP (includes EG:12796),IFNG (includes EG:15978),MMP8,PTPRC                                     | 4  |
| Skeletal and Muscular Disorders                | systemic lupus erythematosus | systemic lupus erythematosus                          | 6,07E-04 | CAMP (includes EG:12796),IFNG (includes EG:15978),MMP8,PTPRC                                     | 4  |
| Immunological Disease                          | systemic lupus erythematosus | systemic lupus erythematosus                          | 6,07E-04 | CAMP (includes EG:12796),IFNG (includes EG:15978),MMP8,PTPRC                                     | 4  |
| Cardiovascular System Development and Function | angiogenesis                 | angiogenesis                                          | 6,08E-04 | APOB,CAMP (includes EG:12796),CXCL10,CXCL9,IFNG (includes EG:15978),IL6,PTGS2,SELL               | 8  |
| Inflammatory Response                          | TH1 immune response          | TH1 immune response                                   | 6,21E-04 | CXCL10,IFNG (includes EG:15978),IL6                                                              | 3  |
| Cardiovascular System Development and Function | abnormal morphology          | abnormal morphology of left ventricle                 | 6,21E-04 | ACE2 (includes EG:302668),IL6,PPARGC1A                                                           | 2  |
| Organ Morphology                               | abnormal morphology          | abnormal morphology of left ventricle                 | 6,21E-04 | ACE2 (includes EG:302668),IL6,PPARGC1A                                                           | 3  |
| Cell-To-Cell Signaling and Interaction         | binding                      | binding of vascular endothelial cells                 | 6,21E-04 | CXCR2,IFNG (includes EG:15978),SELL                                                              | 3  |
| Cardiovascular System Development and Function | binding                      | binding of vascular endothelial cells                 | 6,21E-04 | CXCR2,IFNG (includes EG:15978),SELL                                                              | 3  |
| Cellular Movement                              | migration                    | migration of colon cancer cell lines                  | 6,21E-04 | CAMP (includes EG:12796),CXCL10,IFNG (includes EG:15978)                                         | 3  |
| Inflammatory Response                          | ulcerative colitis           | ulcerative colitis                                    | 6,50E-04 | HPGD,MS4A1,PTGS2                                                                                 | 3  |
| Inflammatory Disease                           | ulcerative colitis           | ulcerative colitis                                    | 6,50E-04 | HPGD,MS4A1,PTGS2                                                                                 | 3  |
| Gastrointestinal Disease                       | ulcerative colitis           | ulcerative colitis                                    | 6,50E-04 | HPGD,MS4A1,PTGS2                                                                                 | 3  |
| Cellular Growth and Proliferation              | inhibition                   | inhibition of cells                                   | 6,54E-04 | CXCL10,IFNG (includes EG:15978),IL6,PTGS2                                                        | 4  |
| Inflammatory Disease                           | pancreatitis                 | Pancreatitis                                          | 6,80E-04 | CFTR,IFNG (includes EG:15978),PTGS2                                                              | 3  |
| Endocrine System Disorders                     | pancreatitis                 | Pancreatitis                                          | 6,80E-04 | CFTR,IFNG (includes EG:15978),PTGS2                                                              | 3  |
| Gastrointestinal Disease                       | pancreatitis                 | Pancreatitis                                          | 6,80E-04 | CFTR,IFNG (includes EG:15978),PTGS2                                                              | 3  |
| Carbohydrate Metabolism                        | quantity                     | quantity of carbohydrate                              | 6,83E-04 | CAMP (includes EG:12796),FABP2,FOXO2,IFNG (includes EG:15978),IL6,PPARGC1A,PTGS2                 | 7  |
| Molecular Transport                            | accumulation                 | accumulation of anion                                 | 6,87E-04 | IFNG (includes EG:15978),IL6                                                                     | 2  |
| Cell Death and Survival                        | apoptosis                    | apoptosis of airway epithelial cells                  | 6,87E-04 | CAMP (includes EG:12796),IFNG (includes EG:15978)                                                | 2  |
| Cellular Movement                              | cell movement                | cell movement of monocyte-derived macrophages         | 6,87E-04 | CAMP (includes EG:12796),SELL                                                                    | 2  |
| Hematological System Development and Function  | cell movement                | cell movement of monocyte-derived macrophages         | 6,87E-04 | CAMP (includes EG:12796),SELL                                                                    | 2  |
| Immune Cell Trafficking                        | cell movement                | cell movement of monocyte-derived macrophages         | 6,87E-04 | CAMP (includes EG:12796),SELL                                                                    | 2  |
| Inflammatory Response                          | cell movement                | cell movement of monocyte-derived macrophages         | 6,87E-04 | CAMP (includes EG:12796),SELL                                                                    | 2  |
| Cellular Movement                              | cell rolling                 | cell rolling of T lymphocytes                         | 6,87E-04 | IFNG (includes EG:15978),SELL                                                                    | 2  |
| Hematological System Development and Function  | cell rolling                 | cell rolling of T lymphocytes                         | 6,87E-04 | IFNG (includes EG:15978),SELL                                                                    | 2  |
| Immune Cell Trafficking                        | cell rolling                 | cell rolling of T lymphocytes                         | 6,87E-04 | IFNG (includes EG:15978),SELL                                                                    | 2  |
| Cell-mediated Immune Response                  | cell rolling                 | cell rolling of T lymphocytes                         | 6,87E-04 | IFNG (includes EG:15978),SELL                                                                    | 2  |
| Cellular Movement                              | extravasation                | extravasation of granulocytes                         | 6,87E-04 | Ch33/Chi34,SELL                                                                                  | 2  |
| Hematological System Development and Function  | extravasation                | extravasation of granulocytes                         | 6,87E-04 | Ch33/Chi34,SELL                                                                                  | 2  |
| Small Molecule Biochemistry                    | formation                    | formation of hydrogen peroxide                        | 6,87E-04 | IFNG (includes EG:15978),IL6                                                                     | 2  |
| Free Radical Scavenging                        | formation                    | formation of hydrogen peroxide                        | 6,87E-04 | IFNG (includes EG:15978),IL6                                                                     | 2  |
| Cell Death and Survival                        | killing                      | killing of leukemia cell lines                        | 6,87E-04 | CAMP (includes EG:12796),IFNG (includes EG:15978)                                                | 2  |
| Organismal Injury and Abnormalities            | atherogenesis                | atherogenesis                                         | 7,11E-04 | APOB,CXCL10,IFNG (includes EG:15978)                                                             | 3  |
| Cardiovascular Disease                         | atherogenesis                | atherogenesis                                         | 7,11E-04 | APOB,CXCL10,IFNG (includes EG:15978)                                                             | 3  |
| Carbohydrate Metabolism                        | binding                      | binding of polysaccharide                             | 7,11E-04 | CAMP (includes EG:12796),CXCL10,IFNG (includes EG:15978)                                         | 3  |
| Cellular Movement                              | cell movement                | cell movement of hematopoietic progenitor cells       | 7,11E-04 | CXCL10,CXCL9,IFNG (includes EG:15978)                                                            | 3  |
| Hematological System Development and Function  | cell movement                | cell movement of hematopoietic progenitor cells       | 7,11E-04 | CXCL10,CXCL9,IFNG (includes EG:15978)                                                            | 3  |
| Cellular Movement                              | migration                    | migration of keratinocytes                            | 7,11E-04 | CXCL10,IL6,SELL                                                                                  | 3  |
| Hair and Skin Development and Function         | migration                    | migration of keratinocytes                            | 7,11E-04 | CXCL10,IL6,SELL                                                                                  | 3  |
| Cellular Movement                              | mobilization                 | mobilization of blood cells                           | 7,11E-04 | CXCL10,IFNG (includes EG:15978),SELL                                                             | 3  |
| Hematological System Development and Function  | mobilization                 | mobilization of blood cells                           | 7,11E-04 | CXCL10,IFNG (includes EG:15978),SELL                                                             | 3  |
| Immunological Disease                          | allergy                      | allergy                                               | 7,21E-04 | CAMP (includes EG:12796),Ch33/Chi34,IFNG (includes EG:15978),PTGS2                               | 4  |
| Cellular Movement                              | cell movement                | cell movement of dendritic cells                      | 7,21E-04 | CXCL10,CXCL9,CXCR2,IFNG (includes EG:15978)                                                      | 4  |
| Hematological System Development and Function  | cell movement                | cell movement of dendritic cells                      | 7,21E-04 | CXCL10,CXCL9,CXCR2,IFNG (includes EG:15978)                                                      | 4  |
| Immune Cell Trafficking                        | cell movement                | cell movement of dendritic cells                      | 7,21E-04 | CXCL10,CXCL9,CXCR2,IFNG (includes EG:15978)                                                      | 4  |
| Inflammatory Response                          | cell movement                | cell movement of dendritic cells                      | 7,21E-04 | CXCL10,CXCL9,CXCR2,IFNG (includes EG:15978)                                                      | 4  |
| Cell Death and Survival                        | apoptosis                    | apoptosis of leukemia cells                           | 7,42E-04 | IFNG (includes EG:15978),IL6,MS4A1                                                               | 3  |
| Tumor Morphology                               | apoptosis                    | apoptosis of leukemia cells                           | 7,42E-04 | IFNG (includes EG:15978),IL6,MS4A1                                                               | 3  |
| Cell Death and Survival                        | cell death                   | cell death of hepatoma cell lines                     | 7,56E-04 | IFNG (includes EG:15978),IL6,PTGS2,SLC7A11                                                       | 4  |
| Organismal Injury and Abnormalities            | fibrosis                     | fibrosis                                              | 7,71E-04 | ACE2 (includes EG:302668),CFTR,CXCL9,IFNG (includes EG:15978),IL6,PTGS2,SELL                     | 7  |
| Respiratory Disease                            | asthma                       | Asthma                                                | 7,75E-04 | CXCL10,IFNG (includes EG:15978),PTGS2,PTPRC                                                      | 4  |
| Inflammatory Disease                           | asthma                       | Asthma                                                | 7,75E-04 | CXCL10,IFNG (includes EG:15978),PTGS2,PTPRC                                                      | 4  |
| Cell Death and Survival                        | apoptosis                    | apoptosis of carcinoma cell lines                     | 7,75E-04 | CAMP (includes EG:12796),IFNG (includes EG:15978),IL6,PTGS2                                      | 4  |
| Hematological System Development and Function  | activation                   | activation of monocyte-derived dendritic cells        | 7,84E-04 | IFNG (includes EG:15978),IL6                                                                     | 2  |
| Immune Cell Trafficking                        | activation                   | activation of monocyte-derived dendritic cells        | 7,84E-04 | IFNG (includes EG:15978),IL6                                                                     | 2  |
| Inflammatory Response                          | activation                   | activation of monocyte-derived dendritic cells        | 7,84E-04 | IFNG (includes EG:15978),IL6                                                                     | 2  |
| Cell-To-Cell Signaling and Interaction         | activation                   | activation of monocyte-derived dendritic cells        | 7,84E-04 | IFNG (includes EG:15978),IL6                                                                     | 2  |
| Cellular Movement                              | chemotaxis                   | chemotaxis of microglia                               | 7,84E-04 | CXCL10,CXCL9                                                                                     | 2  |
| Hematological System Development and Function  | chemotaxis                   | chemotaxis of microglia                               | 7,84E-04 | CXCL10,CXCL9                                                                                     | 2  |
| Immune Cell Trafficking                        | chemotaxis                   | chemotaxis of microglia                               | 7,84E-04 | CXCL10,CXCL9                                                                                     | 2  |
| Inflammatory Response                          | chemotaxis                   | chemotaxis of microglia                               | 7,84E-04 | CXCL10,CXCL9                                                                                     | 2  |
| Nervous System Development and Function        | chemotaxis                   | chemotaxis of microglia                               | 7,84E-04 | CXCL10,CXCL9                                                                                     | 2  |
| Hematological System Development and Function  | colony formation             | colony formation of colony-forming units granulocytes | 7,84E-04 | IFNG (includes EG:15978),IL6                                                                     | 2  |
| Hematopoiesis                                  | colony formation             | colony formation of colony-forming units granulocytes | 7,84E-04 | IFNG (includes EG:15978),IL6                                                                     | 2  |
| Cellular Growth and Proliferation              | colony formation             | colony formation of colony-forming units granulocytes | 7,84E-04 | IFNG (includes EG:15978),IL6                                                                     | 2  |
| Cancer                                         | hyperplasia                  | hyperplasia of goblet cells                           | 7,84E-04 | FOXA2,IFNG (includes EG:15978)                                                                   | 2  |
| Hematological System Development and Function  | induction                    | induction of helper T lymphocytes                     | 7,84E-04 | IFNG (includes EG:15978),IL6                                                                     | 2  |
| Cell-To-Cell Signaling and Interaction         | induction                    | induction of helper T lymphocytes                     | 7,84E-04 | IFNG (includes EG:15978),IL6                                                                     | 2  |
| Cellular Growth and Proliferation              | induction                    | induction of helper T lymphocytes                     | 7,84E-04 | IFNG (includes EG:15978),IL6                                                                     | 2  |
| Connective Tissue Disorders                    | damage                       | damage of cartilage tissue                            | 8,08E-04 | IFNG (includes EG:15978),IL6,PTGS2                                                               | 3  |
| Skeletal and Muscular Disorders                | damage                       | damage of cartilage tissue                            | 8,08E-04 | IFNG (includes EG:15978),IL6,PTGS2                                                               | 3  |
| Tissue Morphology                              | damage                       | damage of cartilage tissue                            | 8,08E-04 | IFNG (includes EG:15978),IL6,PTGS2                                                               | 3  |
| Organismal Injury and Abnormalities            | damage                       | damage of cartilage tissue                            | 8,08E-04 | IFNG (includes EG:15978),IL6,PTGS2                                                               | 3  |
| Infectious Disease                             | infection                    | infection by Herpesviridae                            | 8,08E-04 | CXCL10,CXCL9,CXCR2                                                                               | 2  |
| Cell Death and Survival                        | necrosis                     | necrosis of liver                                     | 8,08E-04 | IFNG (includes EG:15978),IL6,PTGS2,PTPRC,SELL                                                    | 5  |
| Cancer                                         | digestive organ tumor        | digestive organ tumor                                 | 8,29E-04 | AADAC,AGR3,CFTR,CXCL10,CXCR2,FOXO2,IFNG (includes EG:15978),IL6,MS4A1,PTGS2,PTPRC,SLC7A11,UGT2B7 | 13 |
| Gastrointestinal Disease                       | digestive organ tumor        | digestive organ tumor                                 | 8,29E-04 | AADAC,AGR3,CFTR,CXCL10,CXCR2,FOXO2,IFNG (includes EG:15978),IL6,MS4A1,PTGS2,PTPRC,SLC7A11,UGT2B7 | 13 |
| Infectious Disease                             | infection                    | Parasitic Infection                                   | 8,31E-04 | CXCR2,IFNG (includes EG:15978),IL6,PTGS2                                                         | 4  |
| Hematological System Development and Function  | accumulation                 | accumulation of T lymphocytes                         | 8,42E-04 | CXCL10,IFNG (includes EG:15978),IL6                                                              | 3  |
| Immune Cell Trafficking                        | accumulation                 | accumulation of T lymphocytes                         | 8,42E-04 | CXCL10,IFNG (includes EG:15978),IL6                                                              | 3  |
| Inflammatory Response                          | accumulation                 | accumulation of T lymphocytes                         | 8,42E-04 | CXCL10,IFNG (includes EG:15978),IL6                                                              | 3  |
| Tissue Development                             | infiltration                 | accumulation of T lymphocytes                         | 8,42E-04 | CXCL10,IFNG (includes EG:15978),IL6                                                              | 3  |
| Cellular Movement                              | infiltration                 | infiltration by T lymphocytes                         | 8,42E-04 | CXCL10,IFNG (includes EG:15978),IL6                                                              | 3  |
| Hematological System Development and Function  | infiltration                 | infiltration by T lymphocytes                         | 8,42E-04 | CXCL10,IFNG (includes EG:15978),IL6                                                              | 3  |

|                                                |                                            |                                                     |          |                                                                                                         |   |
|------------------------------------------------|--------------------------------------------|-----------------------------------------------------|----------|---------------------------------------------------------------------------------------------------------|---|
| Immune Cell Trafficking                        | infiltration                               | infiltration by T lymphocytes                       | 8,42E-04 | CXCL10,IFNG (includes EG:15978),IL6                                                                     | 3 |
| Cell-mediated Immune Response                  | infiltration                               | infiltration by T lymphocytes                       | 8,42E-04 | CXCL10,IFNG (includes EG:15978),IL6                                                                     | 3 |
| Hematological System Development and Function  | quantity                                   | quantity of phagocytes                              | 8,48E-04 | CXCL10,CXCR2,IFNG (includes EG:15978),IL6,MMP8,SELL                                                     | 6 |
| Inflammatory Response                          | quantity                                   | quantity of phagocytes                              | 8,48E-04 | CXCL10,CXCR2,IFNG (includes EG:15978),IL6,MMP8,SELL                                                     | 6 |
| Tissue Morphology                              | quantity                                   | quantity of phagocytes                              | 8,48E-04 | CXCL10,CXCR2,IFNG (includes EG:15978),IL6,MMP8,SELL                                                     | 6 |
| Hematological System Development and Function  | binding                                    | binding of T lymphocytes                            | 8,77E-04 | CXCL10,CXCL9,IFNG (includes EG:15978)                                                                   | 3 |
| Cell-To-Cell Signaling and Interaction         | binding                                    | binding of T lymphocytes                            | 8,77E-04 | CXCL10,CXCL9,IFNG (includes EG:15978)                                                                   | 3 |
| Tissue Development                             | binding                                    | binding of T lymphocytes                            | 8,77E-04 | CXCL10,CXCL9,IFNG (includes EG:15978)                                                                   | 3 |
| Energy Production                              | oxidation                                  | oxidation of long chain fatty acid                  | 8,77E-04 | FABP2,IL6,PPARGC1A                                                                                      | 3 |
| Lipid Metabolism                               | oxidation                                  | oxidation of long chain fatty acid                  | 8,77E-04 | FABP2,IL6,PPARGC1A                                                                                      | 3 |
| Small Molecule Biochemistry                    | oxidation                                  | oxidation of long chain fatty acid                  | 8,77E-04 | FABP2,IL6,PPARGC1A                                                                                      | 3 |
| Cell-To-Cell Signaling and Interaction         | binding                                    | binding of hepatoma cell lines                      | 8,87E-04 | CXCL10,IL6                                                                                              | 2 |
| Cellular Movement                              | chemoattraction                            | chemoattraction of T lymphocytes                    | 8,87E-04 | CXCL10,CXCL9                                                                                            | 2 |
| Hematological System Development and Function  | chemoattraction                            | chemoattraction of T lymphocytes                    | 8,87E-04 | CXCL10,CXCL9                                                                                            | 2 |
| Immune Cell Trafficking                        | chemoattraction                            | chemoattraction of T lymphocytes                    | 8,87E-04 | CXCL10,CXCL9                                                                                            | 2 |
| Inflammatory Response                          | chemoattraction                            | chemoattraction of T lymphocytes                    | 8,87E-04 | CXCL10,CXCL9                                                                                            | 2 |
| Cell-To-Cell Signaling and Interaction         | chemoattraction                            | chemoattraction of T lymphocytes                    | 8,87E-04 | CXCL10,CXCL9                                                                                            | 2 |
| Cell-mediated Immune Response                  | chemoattraction                            | chemoattraction of T lymphocytes                    | 8,87E-04 | CXCL10,CXCL9                                                                                            | 2 |
| Cellular Movement                              | chemotaxis                                 | chemotaxis of vascular endothelial cells            | 8,87E-04 | CXCR2,PTGS2                                                                                             | 2 |
| Cardiovascular System Development and Function | chemotaxis                                 | chemotaxis of vascular endothelial cells            | 8,87E-04 | CXCR2,PTGS2                                                                                             | 2 |
| Hematological System Development and Function  | differentiation                            | differentiation of memory B cells                   | 8,87E-04 | IL6,PTGS2                                                                                               | 2 |
| Humoral Immune Response                        | differentiation                            | differentiation of memory B cells                   | 8,87E-04 | IL6,PTGS2                                                                                               | 2 |
| Cellular Development                           | differentiation                            | differentiation of memory B cells                   | 8,87E-04 | IL6,PTGS2                                                                                               | 2 |
| Hematopoiesis                                  | differentiation                            | differentiation of memory B cells                   | 8,87E-04 | IL6,PTGS2                                                                                               | 2 |
| Infectious Disease                             | quantity                                   | quantity of Influenza A virus                       | 8,87E-04 | IFNG (includes EG:15978),PTGS2                                                                          | 2 |
| Lipid Metabolism                               | quantity                                   | quantity of fat                                     | 8,87E-04 | APOB,FABP2                                                                                              | 2 |
| Small Molecule Biochemistry                    | quantity                                   | quantity of fat                                     | 8,87E-04 | APOB,FABP2                                                                                              | 2 |
| Molecular Transport                            | quantity                                   | quantity of fat                                     | 8,87E-04 | APOB,FABP2                                                                                              | 2 |
| Organismal Functions                           | thermoregulation                           | thermoregulation                                    | 9,10E-04 | IFNG (includes EG:15978),IL6,PPARGC1A,PTGS2                                                             | 4 |
| Hematological System Development and Function  | adhesion                                   | adhesion of neutrophils                             | 9,13E-04 | CXCR2,IL6,SELL                                                                                          | 3 |
| Immune Cell Trafficking                        | adhesion                                   | adhesion of neutrophils                             | 9,13E-04 | CXCR2,IL6,SELL                                                                                          | 3 |
| Inflammatory Response                          | adhesion                                   | adhesion of neutrophils                             | 9,13E-04 | CXCR2,IL6,SELL                                                                                          | 3 |
| Cell-To-Cell Signaling and Interaction         | adhesion                                   | adhesion of neutrophils                             | 9,13E-04 | CXCR2,IL6,SELL                                                                                          | 3 |
| Tissue Development                             | adhesion                                   | adhesion of neutrophils                             | 9,13E-04 | CXCR2,IL6,SELL                                                                                          | 3 |
| Neurological Disease                           | demyelination                              | demyelination of nervous tissue                     | 9,13E-04 | CXCL10,IFNG (includes EG:15978),IL6                                                                     | 3 |
| Cardiovascular Disease                         | hyperlipidemia                             | hyperlipidemia                                      | 9,13E-04 | APOB,IL6,PTGS2                                                                                          | 3 |
| Metabolic Disease                              | hyperlipidemia                             | hyperlipidemia                                      | 9,13E-04 | APOB,IL6,PTGS2                                                                                          | 3 |
| Cellular Development                           | differentiation                            | differentiation of epithelial cells                 | 9,30E-04 | CSTA,FOXA2,IFNG (includes EG:15978),IL6,PTGS2                                                           | 5 |
| Inflammatory Response                          | antibody response                          | antibody response                                   | 9,30E-04 | CAMP (includes EG:12796),IFNG (includes EG:15978),IL6,PTPRC                                             | 4 |
| Nervous System Development and Function        | myelination                                | myelination                                         | 9,30E-04 | CXCL10,CXCR2,IFNG (includes EG:15978),PTPRC                                                             | 4 |
| Cardiovascular System Development and Function | vasculogenesis                             | vasculogenesis                                      | 9,45E-04 | ACE2 (includes EG:302668),APOB,CAMP (includes EG:12796),CXCL10,CXCR2,IFNG (includes EG:15978),IL6,PTGS2 | 8 |
| Organismal Development                         | vasculogenesis                             | vasculogenesis                                      | 9,45E-04 | ACE2 (includes EG:302668),APOB,CAMP (includes EG:12796),CXCL10,CXCR2,IFNG (includes EG:15978),IL6,PTGS2 | 8 |
| Cell Death and Survival                        | cytotoxicity                               | cytotoxicity of T lymphocytes                       | 9,49E-04 | IFNG (includes EG:15978),IL6,PTPRC                                                                      | 3 |
| Vitamin and Mineral Metabolism                 | quantity                                   | quantity of vitamin                                 | 9,49E-04 | IFNG (includes EG:15978),IL6,PTGS2                                                                      | 3 |
| Gastrointestinal Disease                       | diarrhea                                   | diarrhea                                            | 9,87E-04 | CFTR,PTGS2,PTPRC                                                                                        | 3 |
| Cell Death and Survival                        | apoptosis                                  | apoptosis of macrophage cancer cell lines           | 9,96E-04 | IFNG (includes EG:15978),ZC3H12A                                                                        | 2 |
| Cellular Development                           | growth                                     | arrest in growth of leukemia cell lines             | 9,96E-04 | IFNG (includes EG:15978),IL6                                                                            | 2 |
| Cellular Growth and Proliferation              | growth                                     | arrest in growth of leukemia cell lines             | 9,96E-04 | IFNG (includes EG:15978),IL6                                                                            | 2 |
| Gene Expression                                | binding                                    | binding of Six-inducible element                    | 9,96E-04 | IFNG (includes EG:15978),IL6                                                                            | 2 |
| Cell-To-Cell Signaling and Interaction         | binding                                    | binding of neuroglia                                | 9,96E-04 | CXCR2,IFNG (includes EG:15978)                                                                          | 2 |
| Hematological System Development and Function  | development                                | development of Th17 cells                           | 9,96E-04 | IFNG (includes EG:15978),IL6                                                                            | 2 |
| Cell-mediated Immune Response                  | development                                | development of Th17 cells                           | 9,96E-04 | IFNG (includes EG:15978),IL6                                                                            | 2 |
| Cellular Function and Maintenance              | development                                | development of Th17 cells                           | 9,96E-04 | IFNG (includes EG:15978),IL6                                                                            | 2 |
| Lymphoid Tissue Structure and Development      | development                                | development of Th17 cells                           | 9,96E-04 | IFNG (includes EG:15978),IL6                                                                            | 2 |
| Cellular Development                           | development                                | development of Th17 cells                           | 9,96E-04 | IFNG (includes EG:15978),IL6                                                                            | 2 |
| Hematopoiesis                                  | development                                | development of Th17 cells                           | 9,96E-04 | IFNG (includes EG:15978),IL6                                                                            | 2 |
| Organismal Injury and Abnormalities            | edema                                      | edema of tissue                                     | 9,96E-04 | IFNG (includes EG:15978),IL6                                                                            | 2 |
| Cell-To-Cell Signaling and Interaction         | gap junctional intercellular communication | gap junctional intercellular communication of cells | 9,96E-04 | CFTR,IL6                                                                                                | 2 |
| Infectious Disease                             | infection                                  | infection by Hepatitis C virus                      | 9,96E-04 | CXCL10,CXCL9                                                                                            | 2 |
| Small Molecule Biochemistry                    | quantity                                   | quantity of nitrite                                 | 9,96E-04 | IFNG (includes EG:15978),IL6                                                                            | 2 |
| Molecular Transport                            | quantity                                   | quantity of nitrite                                 | 9,96E-04 | IFNG (includes EG:15978),IL6                                                                            | 2 |
| Infectious Disease                             | replication                                | replication of flavivirus                           | 9,96E-04 | CXCL10,IFNG (includes EG:15978)                                                                         | 2 |
| Inflammatory Disease                           | atopic dermatitis                          | atopic dermatitis                                   | 1,00E-03 | CAMP (includes EG:12796),CXCL9,LCE3D,PPARGC1A,PTGS2                                                     | 5 |
| Dermatological Diseases and Conditions         | atopic dermatitis                          | atopic dermatitis                                   | 1,00E-03 | CAMP (includes EG:12796),CXCL9,LCE3D,PPARGC1A,PTGS2                                                     | 5 |
| Immunological Disease                          | atopic dermatitis                          | atopic dermatitis                                   | 1,00E-03 | CAMP (includes EG:12796),CXCL9,LCE3D,PPARGC1A,PTGS2                                                     | 5 |
| Hematological System Development and Function  | differentiation                            | differentiation of erythroid progenitor cells       | 1,03E-03 | IFNG (includes EG:15978),IL6,PTPRC                                                                      | 3 |
| Cellular Development                           | differentiation                            | differentiation of erythroid progenitor cells       | 1,03E-03 | IFNG (includes EG:15978),IL6,PTPRC                                                                      | 3 |
| Hematopoiesis                                  | differentiation                            | differentiation of erythroid progenitor cells       | 1,03E-03 | IFNG (includes EG:15978),IL6,PTPRC                                                                      | 3 |
| Small Molecule Biochemistry                    | quantity                                   | quantity of nitric oxide                            | 1,03E-03 | ACE2 (includes EG:302668),IFNG (includes EG:15978),IL6                                                  | 3 |
| Cell Signaling                                 | quantity                                   | quantity of nitric oxide                            | 1,03E-03 | ACE2 (includes EG:302668),IFNG (includes EG:15978),IL6                                                  | 3 |
| Small Molecule Biochemistry                    | metabolism                                 | metabolism of D-glucose                             | 1,07E-03 | FOXA2,IL6,PPARGC1A                                                                                      | 3 |
| Carbohydrate Metabolism                        | metabolism                                 | metabolism of D-glucose                             | 1,07E-03 | FOXA2,IL6,PPARGC1A                                                                                      | 3 |
| Lymphoid Tissue Structure and Development      | morphology                                 | morphology of spleen component                      | 1,07E-03 | CXCR2,IFNG (includes EG:15978),MARCO                                                                    | 3 |
| Organ Morphology                               | morphology                                 | morphology of spleen component                      | 1,07E-03 | CXCR2,IFNG (includes EG:15978),MARCO                                                                    | 3 |
| Hematological System Development and Function  | development                                | development of myeloid cells                        | 1,11E-03 | IFNG (includes EG:15978),IL6,PTGS2                                                                      | 3 |
| Lymphoid Tissue Structure and Development      | development                                | development of myeloid cells                        | 1,11E-03 | IFNG (includes EG:15978),IL6,PTGS2                                                                      | 3 |
| Cellular Development                           | development                                | development of myeloid cells                        | 1,11E-03 | IFNG (includes EG:15978),IL6,PTGS2                                                                      | 3 |
| Hematopoiesis                                  | development                                | development of myeloid cells                        | 1,11E-03 | IFNG (includes EG:15978),IL6,PTGS2                                                                      | 3 |
| Reproductive System Development and Function   | gestation                                  | gestation                                           | 1,11E-03 | HPGD,IL6,PTGS2                                                                                          | 3 |
| Humoral Immune Response                        | quantity                                   | quantity of IgA                                     | 1,11E-03 | IFNG (includes EG:15978),IL6,ZC3H12A                                                                    | 3 |
| Protein Synthesis                              | quantity                                   | quantity of IgA                                     | 1,11E-03 | IFNG (includes EG:15978),IL6,ZC3H12A                                                                    | 3 |
| Cell Death and Survival                        | apoptosis                                  | apoptosis of liver cells                            | 1,11E-03 | IFNG (includes EG:15978),IL6,PTGS2,PTPRC                                                                | 4 |
| Cell-To-Cell Signaling and Interaction         | attachment                                 | attachment of blood cells                           | 1,11E-03 | ACE2 (includes EG:302668),SELL                                                                          | 2 |
| Tissue Development                             | attachment                                 | attachment of blood cells                           | 1,11E-03 | ACE2 (includes EG:302668),SELL                                                                          | 2 |
| Cell Cycle                                     | cell cycle progression                     | cell cycle progression of liver cells               | 1,11E-03 | IFNG (includes EG:15978),IL6                                                                            | 2 |
| Cell Death and Survival                        | cell viability                             | cell viability of sympathetic neuron                | 1,11E-03 | CXCL9,IL6                                                                                               | 2 |
| Nervous System Development and Function        | cell viability                             | cell viability of sympathetic neuron                | 1,11E-03 | CXCL9,IL6                                                                                               | 2 |
| Neurological Disease                           | demyelination                              | demyelination of spinal cord                        | 1,11E-03 | CXCL10,IFNG (includes EG:15978)                                                                         | 2 |
| Carbohydrate Metabolism                        | efflux                                     | efflux of carbohydrate                              | 1,11E-03 | IFNG (includes EG:15978),PTGS2                                                                          | 2 |

|                                                |                                         |                                                   |          |                                                                    |   |
|------------------------------------------------|-----------------------------------------|---------------------------------------------------|----------|--------------------------------------------------------------------|---|
| Cellular Function and Maintenance              | flux                                    | flux of chloride                                  | 1,11E-03 | CFTR,IFNG (includes EG:15978)                                      | 2 |
| Molecular Transport                            | flux                                    | flux of chloride                                  | 1,11E-03 | CFTR,IFNG (includes EG:15978)                                      | 2 |
| Hematological System Development and Function  | proliferation                           | proliferation of microglia                        | 1,11E-03 | IL6,PTPRC                                                          | 2 |
| Cellular Development                           | proliferation                           | proliferation of microglia                        | 1,11E-03 | IL6,PTPRC                                                          | 2 |
| Cellular Growth and Proliferation              | proliferation                           | proliferation of microglia                        | 1,11E-03 | IL6,PTPRC                                                          | 2 |
| Nervous System Development and Function        | proliferation                           | proliferation of microglia                        | 1,11E-03 | IL6,PTPRC                                                          | 2 |
| Inflammatory Disease                           | multiple sclerosis                      | multiple sclerosis                                | 1,13E-03 | IFNG (includes EG:15978),MS4A1,PTGS2,PTPRC                         | 4 |
| Skeletal and Muscular Disorders                | multiple sclerosis                      | multiple sclerosis                                | 1,13E-03 | IFNG (includes EG:15978),MS4A1,PTGS2,PTPRC                         | 4 |
| Neurological Disease                           | multiple sclerosis                      | multiple sclerosis                                | 1,13E-03 | IFNG (includes EG:15978),MS4A1,PTGS2,PTPRC                         | 4 |
| Hematological System Development and Function  | stimulation                             | stimulation of leukocytes                         | 1,13E-03 | CAMP (includes EG:12796),IFNG (includes EG:15978),IL6,PTPRC        | 4 |
| Cell-To-Cell Signaling and Interaction         | stimulation                             | stimulation of leukocytes                         | 1,13E-03 | CAMP (includes EG:12796),IFNG (includes EG:15978),IL6,PTPRC        | 4 |
| Cellular Growth and Proliferation              | stimulation                             | stimulation of leukocytes                         | 1,13E-03 | CAMP (includes EG:12796),IFNG (includes EG:15978),IL6,PTPRC        | 4 |
| Small Molecule Biochemistry                    | concentration                           | concentration of hormone                          | 1,17E-03 | FABP2,HPGD,IFNG (includes EG:15978),IL6,PPARGC1A,PTGS2             | 6 |
| Molecular Transport                            | concentration                           | concentration of hormone                          | 1,17E-03 | FABP2,HPGD,IFNG (includes EG:15978),IL6,PPARGC1A,PTGS2             | 6 |
| Endocrine System Development and Function      | concentration                           | concentration of hormone                          | 1,17E-03 | FABP2,HPGD,IFNG (includes EG:15978),IL6,PPARGC1A,PTGS2             | 6 |
| Cellular Movement                              | cell movement                           | cell movement of muscle cells                     | 1,18E-03 | CXCL10,IFNG (includes EG:15978),IL6,PTGS2                          | 4 |
| Lipid Metabolism                               | homeostasis                             | homeostasis of lipid                              | 1,18E-03 | APOB,FABP2,PPARGC1A,PTGS2                                          | 6 |
| Small Molecule Biochemistry                    | homeostasis                             | homeostasis of lipid                              | 1,18E-03 | APOB,FABP2,PPARGC1A,PTGS2                                          | 4 |
| Skeletal and Muscular Disorders                | damage                                  | damage of bone                                    | 1,19E-03 | IFNG (includes EG:15978),IL6,PTGS2                                 | 3 |
| Tissue Morphology                              | damage                                  | damage of bone                                    | 1,19E-03 | IFNG (includes EG:15978),IL6,PTGS2                                 | 3 |
| Organismal Injury and Abnormalities            | damage                                  | damage of bone                                    | 1,19E-03 | IFNG (includes EG:15978),IL6,PTGS2                                 | 3 |
| Cancer                                         | size                                    | size of tumor                                     | 1,19E-03 | IL6,PPARGC1A,PTGS2                                                 | 3 |
| Tumor Morphology                               | size                                    | size of tumor                                     | 1,19E-03 | IL6,PPARGC1A,PTGS2                                                 | 3 |
| Tissue Development                             | morphology                              | morphology of lung                                | 1,23E-03 | CFTR,FOXA2,PPARGC1A,SELL                                           | 4 |
| Organ Morphology                               | morphology                              | morphology of lung                                | 1,23E-03 | CFTR,FOXA2,PPARGC1A,SELL                                           | 4 |
| Embryonic Development                          | morphology                              | morphology of lung                                | 1,23E-03 | CFTR,FOXA2,PPARGC1A,SELL                                           | 4 |
| Organismal Development                         | morphology                              | morphology of lung                                | 1,23E-03 | CFTR,FOXA2,PPARGC1A,SELL                                           | 4 |
| Organ Development                              | morphology                              | morphology of lung                                | 1,23E-03 | CFTR,FOXA2,PPARGC1A,SELL                                           | 4 |
| Respiratory System Development and Function    | morphology                              | morphology of lung                                | 1,23E-03 | CFTR,FOXA2,PPARGC1A,SELL                                           | 4 |
| Cellular Movement                              | attraction                              | attraction of neutrophils                         | 1,23E-03 | CAMP (includes EG:12796),CXCL10                                    | 2 |
| Hematological System Development and Function  | attraction                              | attraction of neutrophils                         | 1,23E-03 | CAMP (includes EG:12796),CXCL10                                    | 2 |
| Immune Cell Trafficking                        | attraction                              | attraction of neutrophils                         | 1,23E-03 | CAMP (includes EG:12796),CXCL10                                    | 2 |
| Cell-To-Cell Signaling and Interaction         | attraction                              | attraction of neutrophils                         | 1,23E-03 | CAMP (includes EG:12796),CXCL10                                    | 2 |
| Cellular Function and Maintenance              | function                                | function of keratinocytes                         | 1,23E-03 | SELL,TRPV3                                                         | 2 |
| Hematological System Development and Function  | generation                              | generation of Th17 cells                          | 1,23E-03 | IFNG (includes EG:15978),IL6                                       | 2 |
| Cellular Development                           | generation                              | generation of Th17 cells                          | 1,23E-03 | IFNG (includes EG:15978),IL6                                       | 2 |
| Cellular Growth and Proliferation              | generation                              | generation of Th17 cells                          | 1,23E-03 | IFNG (includes EG:15978),IL6                                       | 2 |
| Organismal Injury and Abnormalities            | pathogenesis                            | pathogenesis                                      | 1,23E-03 | IFNG (includes EG:15978),MS4A1                                     | 2 |
| Small Molecule Biochemistry                    | secretion                               | secretion of nitric oxide                         | 1,23E-03 | IFNG (includes EG:15978),PTPRC                                     | 2 |
| Molecular Transport                            | secretion                               | secretion of nitric oxide                         | 1,23E-03 | IFNG (includes EG:15978),PTPRC                                     | 2 |
| Cell Signaling                                 | secretion                               | secretion of nitric oxide                         | 1,23E-03 | IFNG (includes EG:15978),PTPRC                                     | 2 |
| Humoral Immune Response                        | quantity                                | quantity of IgG3                                  | 1,23E-03 | IFNG (includes EG:15978),PTGS2,ZC3H12A                             | 3 |
| Protein Synthesis                              | quantity                                | quantity of IgG3                                  | 1,23E-03 | IFNG (includes EG:15978),PTGS2,ZC3H12A                             | 3 |
| Cell-To-Cell Signaling and Interaction         | signaling                               | signaling of cells                                | 1,25E-03 | CAMP (includes EG:12796),CXCL10,CXCL9,IFNG (includes EG:15978),IL6 | 5 |
| Cell Death and Survival                        | apoptosis                               | apoptosis of lung cancer cell lines               | 1,25E-03 | CAMP (includes EG:12796),FOXA2,IL6,PTGS2                           | 4 |
| Cardiovascular System Development and Function | proliferation                           | proliferation of endothelial cells                | 1,27E-03 | CAMP (includes EG:12796),CXCL10,IFNG (includes EG:15978),IL6,PTGS2 | 5 |
| Tissue Development                             | proliferation                           | proliferation of endothelial cells                | 1,27E-03 | CAMP (includes EG:12796),CXCL10,IFNG (includes EG:15978),IL6,PTGS2 | 5 |
| Cellular Development                           | proliferation                           | proliferation of endothelial cells                | 1,27E-03 | CAMP (includes EG:12796),CXCL10,IFNG (includes EG:15978),IL6,PTGS2 | 5 |
| Organismal Development                         | proliferation                           | proliferation of endothelial cells                | 1,27E-03 | CAMP (includes EG:12796),CXCL10,IFNG (includes EG:15978),IL6,PTGS2 | 5 |
| Cellular Growth and Proliferation              | proliferation                           | proliferation of endothelial cells                | 1,27E-03 | CAMP (includes EG:12796),CXCL10,IFNG (includes EG:15978),IL6,PTGS2 | 5 |
| Lipid Metabolism                               | synthesis                               | synthesis of sterol                               | 1,28E-03 | APOB,CFTR,IFNG (includes EG:15978)                                 | 3 |
| Small Molecule Biochemistry                    | synthesis                               | synthesis of sterol                               | 1,28E-03 | APOB,CFTR,IFNG (includes EG:15978)                                 | 3 |
| Vitamin and Mineral Metabolism                 | synthesis                               | synthesis of sterol                               | 1,28E-03 | APOB,CFTR,IFNG (includes EG:15978)                                 | 3 |
| Cellular Movement                              | transmigration                          | transmigration of phagocytes                      | 1,28E-03 | CXCR2,IFNG (includes EG:15978),IL6                                 | 3 |
| Hematological System Development and Function  | transmigration                          | transmigration of phagocytes                      | 1,28E-03 | CXCR2,IFNG (includes EG:15978),IL6                                 | 3 |
| Immune Cell Trafficking                        | transmigration                          | transmigration of phagocytes                      | 1,28E-03 | CXCR2,IFNG (includes EG:15978),IL6                                 | 3 |
| Inflammatory Response                          | transmigration                          | transmigration of phagocytes                      | 1,28E-03 | CXCR2,IFNG (includes EG:15978),IL6                                 | 3 |
| Inflammatory Disease                           | Crohn's disease                         | Crohn's disease                                   | 1,28E-03 | CAMP (includes EG:12796),HPGD,IL6,PTGS2                            | 4 |
| Gastrointestinal Disease                       | Crohn's disease                         | Crohn's disease                                   | 1,28E-03 | CAMP (includes EG:12796),HPGD,IL6,PTGS2                            | 4 |
| Lipid Metabolism                               | concentration                           | concentration of cholesterol                      | 1,30E-03 | APOB,FABP2,IFNG (includes EG:15978),IL6,PTGS2                      | 5 |
| Small Molecule Biochemistry                    | concentration                           | concentration of cholesterol                      | 1,30E-03 | APOB,FABP2,IFNG (includes EG:15978),IL6,PTGS2                      | 5 |
| Molecular Transport                            | concentration                           | concentration of cholesterol                      | 1,30E-03 | APOB,FABP2,IFNG (includes EG:15978),IL6,PTGS2                      | 5 |
| Endocrine System Disorders                     | non-insulin-dependent diabetes mellitus | non-insulin-dependent diabetes mellitus           | 1,30E-03 | APOB,FABP2,FOXA2,IL6,PTGS2                                         | 5 |
| Metabolic Disease                              | non-insulin-dependent diabetes mellitus | non-insulin-dependent diabetes mellitus           | 1,30E-03 | APOB,FABP2,FOXA2,IL6,PTGS2                                         | 5 |
| Gastrointestinal Disease                       | non-insulin-dependent diabetes mellitus | non-insulin-dependent diabetes mellitus           | 1,30E-03 | APOB,FABP2,FOXA2,IL6,PTGS2                                         | 5 |
| Nutritional Disease                            | weight gain                             | weight gain                                       | 1,32E-03 | IFNG (includes EG:15978),IL6,PPARGC1A,PTGS2,SELL                   | 5 |
| Inflammatory Response                          | cell-mediated response                  | cell-mediated response                            | 1,33E-03 | CXCL10,IFNG (includes EG:15978),IL6,SELL                           | 4 |
| Cell Morphology                                | morphology                              | morphology of tumor cell lines                    | 1,33E-03 | FABP2,IFNG (includes EG:15978),IL6,MARCO                           | 4 |
| Hematological System Development and Function  | adhesion                                | adhesion of hematopoietic progenitor cells        | 1,36E-03 | CXCL10,CXCL9                                                       | 2 |
| Immune Cell Trafficking                        | adhesion                                | adhesion of hematopoietic progenitor cells        | 1,36E-03 | CXCL10,CXCL9                                                       | 2 |
| Cell-To-Cell Signaling and Interaction         | adhesion                                | adhesion of hematopoietic progenitor cells        | 1,36E-03 | CXCL10,CXCL9                                                       | 2 |
| Tissue Development                             | adhesion                                | adhesion of hematopoietic progenitor cells        | 1,36E-03 | CXCL10,CXCL9                                                       | 2 |
| Hematopoiesis                                  | adhesion                                | adhesion of hematopoietic progenitor cells        | 1,36E-03 | CXCL10,CXCL9                                                       | 2 |
| Cell Death and Survival                        | apoptosis                               | apoptosis of myeloid leukemia cells               | 1,36E-03 | IFNG (includes EG:15978),IL6                                       | 2 |
| Tumor Morphology                               | apoptosis                               | apoptosis of myeloid leukemia cells               | 1,36E-03 | IFNG (includes EG:15978),IL6                                       | 2 |
| Lipid Metabolism                               | concentration                           | concentration of 1-alpha, 25-dihydroxy vitamin D3 | 1,36E-03 | IFNG (includes EG:15978),PTGS2                                     | 2 |
| Small Molecule Biochemistry                    | concentration                           | concentration of 1-alpha, 25-dihydroxy vitamin D3 | 1,36E-03 | IFNG (includes EG:15978),PTGS2                                     | 2 |
| Molecular Transport                            | concentration                           | concentration of 1-alpha, 25-dihydroxy vitamin D3 | 1,36E-03 | IFNG (includes EG:15978),PTGS2                                     | 2 |
| Vitamin and Mineral Metabolism                 | concentration                           | concentration of 1-alpha, 25-dihydroxy vitamin D3 | 1,36E-03 | IFNG (includes EG:15978),PTGS2                                     | 2 |
| Drug Metabolism                                | concentration                           | concentration of 1-alpha, 25-dihydroxy vitamin D3 | 1,36E-03 | IFNG (includes EG:15978),PTGS2                                     | 2 |
| Hematological System Development and Function  | differentiation                         | differentiation of effector T lymphocytes         | 1,36E-03 | IFNG (includes EG:15978),IL6                                       | 2 |
| Cell-mediated Immune Response                  | differentiation                         | differentiation of effector T lymphocytes         | 1,36E-03 | IFNG (includes EG:15978),IL6                                       | 2 |
| Cellular Function and Maintenance              | differentiation                         | differentiation of effector T lymphocytes         | 1,36E-03 | IFNG (includes EG:15978),IL6                                       | 2 |
| Lymphoid Tissue Structure and Development      | differentiation                         | differentiation of effector T lymphocytes         | 1,36E-03 | IFNG (includes EG:15978),IL6                                       | 2 |
| Cellular Development                           | differentiation                         | differentiation of effector T lymphocytes         | 1,36E-03 | IFNG (includes EG:15978),IL6                                       | 2 |
| Hematopoiesis                                  | differentiation                         | differentiation of effector T lymphocytes         | 1,36E-03 | IFNG (includes EG:15978),IL6                                       | 2 |
| Respiratory Disease                            | eosinophilia                            | eosinophilia of airway                            | 1,36E-03 | CXCL9,IFNG (includes EG:15978)                                     | 2 |
| Hematological Disease                          | eosinophilia                            | eosinophilia of airway                            | 1,36E-03 | CXCL9,IFNG (includes EG:15978)                                     | 2 |
| Immunological Disease                          | eosinophilia                            | eosinophilia of airway                            | 1,36E-03 | CXCL9,IFNG (includes EG:15978)                                     | 2 |
| Hematological System Development and Function  | generation                              | generation of regulatory T lymphocytes            | 1,36E-03 | IFNG (includes EG:15978),IL6                                       | 2 |

|                                                       |                             |                                           |          |                                                         |   |
|-------------------------------------------------------|-----------------------------|-------------------------------------------|----------|---------------------------------------------------------|---|
| Tissue Development                                    | generation                  | generation of regulatory T lymphocytes    | 1,36E-03 | IFNG (includes EG:15978),IL6                            | 2 |
| Cellular Growth and Proliferation                     | generation                  | generation of regulatory T lymphocytes    | 1,36E-03 | IFNG (includes EG:15978),IL6                            | 2 |
| Lipid Metabolism                                      | metabolism                  | metabolism of arachidonic acid            | 1,36E-03 | CFTR,PTGS2                                              | 2 |
| Small Molecule Biochemistry                           | metabolism                  | metabolism of arachidonic acid            | 1,36E-03 | CFTR,PTGS2                                              | 2 |
| Cellular Growth and Proliferation                     | proliferation               | proliferation of duct cells               | 1,36E-03 | IFNG (includes EG:15978),IL6                            | 2 |
| Infectious Disease                                    | replication                 | replication of hepatitis B virus          | 1,36E-03 | IFNG (includes EG:15978),PPARGC1A                       | 2 |
| Cellular Movement                                     | translocation               | translocation of cells                    | 1,36E-03 | CXCL9,IFNG (includes EG:15978)                          | 2 |
| Cell-To-Cell Signaling and Interaction                | detachment                  | detachment of cells                       | 1,37E-03 | CXCL10,PTPRC,SELL                                       | 3 |
| Tissue Development                                    | detachment                  | detachment of cells                       | 1,37E-03 | CXCL10,PTPRC,SELL                                       | 3 |
| Cardiovascular Disease                                | hypertrophy                 | hypertrophy of heart ventricle            | 1,37E-03 | IL6,PPARGC1A,PTGS2                                      | 3 |
| Developmental Disorder                                | hypertrophy                 | hypertrophy of heart ventricle            | 1,37E-03 | IL6,PPARGC1A,PTGS2                                      | 3 |
| Cell Death and Survival                               | cell viability              | cell viability of mononuclear leukocytes  | 1,39E-03 | APOB,IFNG (includes EG:15978),IL6,PTPRC                 | 4 |
| Infectious Disease                                    | endotoxin shock response    | endotoxin shock response                  | 1,42E-03 | IFNG (includes EG:15978),IL6,PTGS2                      | 3 |
| Hematological Disease                                 | endotoxin shock response    | endotoxin shock response                  | 1,42E-03 | IFNG (includes EG:15978),IL6,PTGS2                      | 3 |
| Organismal Injury and Abnormalities                   | endotoxin shock response    | endotoxin shock response                  | 1,42E-03 | IFNG (includes EG:15978),IL6,PTGS2                      | 3 |
| Hematological System Development and Function         | proliferation               | proliferation of antigen presenting cells | 1,42E-03 | IFNG (includes EG:15978),IL6,PTPRC                      | 3 |
| Cellular Development                                  | proliferation               | proliferation of antigen presenting cells | 1,42E-03 | IFNG (includes EG:15978),IL6,PTPRC                      | 3 |
| Cellular Growth and Proliferation                     | proliferation               | proliferation of antigen presenting cells | 1,42E-03 | IFNG (includes EG:15978),IL6,PTPRC                      | 3 |
| Cell Death and Survival                               | cell death                  | cell death of dermal cells                | 1,47E-03 | CAMP (includes EG:12796),IFNG (includes EG:15978),PTGS2 | 3 |
| Cellular Movement                                     | migration                   | migration of vascular smooth muscle cells | 1,47E-03 | IFNG (includes EG:15978),IL6,PTGS2                      | 3 |
| Skeletal and Muscular System Development and Function | migration                   | migration of vascular smooth muscle cells | 1,47E-03 | IFNG (includes EG:15978),IL6,PTGS2                      | 3 |
| Lymphoid Tissue Structure and Development             | proliferation               | proliferation of splenocytes              | 1,47E-03 | CXCL10,IFNG (includes EG:15978),IL6                     | 3 |
| Cellular Development                                  | proliferation               | proliferation of splenocytes              | 1,47E-03 | CXCL10,IFNG (includes EG:15978),IL6                     | 3 |
| Cellular Growth and Proliferation                     | proliferation               | proliferation of splenocytes              | 1,47E-03 | CXCL10,IFNG (includes EG:15978),IL6                     | 3 |
| Cellular Development                                  | proliferation               | proliferation of liver cells              | 1,47E-03 | CXCR2,IFNG (includes EG:15978),IL6,PTGS2                | 4 |
| Cellular Growth and Proliferation                     | proliferation               | proliferation of liver cells              | 1,47E-03 | CXCR2,IFNG (includes EG:15978),IL6,PTGS2                | 4 |
| Hepatic System Development and Function               | proliferation               | proliferation of liver cells              | 1,47E-03 | CXCR2,IFNG (includes EG:15978),IL6,PTGS2                | 4 |
| Reproductive System Disease                           | endometriosis               | endometriosis                             | 1,47E-03 | CXCL10,CXCL9,CXCR2,IL6,PTGS2,UGT2B7                     | 6 |
| Inflammatory Disease                                  | allergic contact dermatitis | allergic contact dermatitis               | 1,49E-03 | CAMP (includes EG:12796),IFNG (includes EG:15978)       | 2 |
| Dermatological Diseases and Conditions                | allergic contact dermatitis | allergic contact dermatitis               | 1,49E-03 | CAMP (includes EG:12796),IFNG (includes EG:15978)       | 2 |
| Immunological Disease                                 | allergic contact dermatitis | allergic contact dermatitis               | 1,49E-03 | CAMP (includes EG:12796),IFNG (includes EG:15978)       | 2 |
| Cell-To-Cell Signaling and Interaction                | binding                     | binding of endothelial cell lines         | 1,49E-03 | IL6,SELL                                                | 2 |
| Cardiovascular System Development and Function        | binding                     | binding of endothelial cell lines         | 1,49E-03 | IL6,SELL                                                | 2 |
| Tissue Development                                    | generation                  | generation of dendritic cells             | 1,49E-03 | IFNG (includes EG:15978),IL6                            | 2 |
| Cellular Growth and Proliferation                     | generation                  | generation of dendritic cells             | 1,49E-03 | IFNG (includes EG:15978),IL6                            | 2 |
| Inflammatory Response                                 | inflammation                | inflammation of stomach                   | 1,49E-03 | IFNG (includes EG:15978),PTGS2                          | 2 |
| Hematological System Development and Function         | maturation                  | maturation of helper T lymphocytes        | 1,49E-03 | IFNG (includes EG:15978),PTGS2                          | 2 |
| Cellular Development                                  | maturation                  | maturation of helper T lymphocytes        | 1,49E-03 | IFNG (includes EG:15978),PTGS2                          | 2 |
| Hematopoiesis                                         | maturation                  | maturation of helper T lymphocytes        | 1,49E-03 | IFNG (includes EG:15978),PTGS2                          | 2 |

**Supplementary Table 5 : Primers sequences for qRT-PCR and qPCR analysis**

| Mouse gene name | Forward primer (5'-3')    | Reverse primer (5'-3')    |
|-----------------|---------------------------|---------------------------|
| Actb            | GAATGGGTCAGAAGGACTCCTATG  | CCATGTCGTCCCAGTTGGTAA     |
| Cldn5           | GGGCCGTCGGGTGAGCATTG      | TCGTCTGCGCCGTCACGATG      |
| Il6             | ACACATGTTCTCTGGGAAATCGT   | AAGTGCATCATCGTTGTTTCATACA |
| Il10            | ATACTGCTAACCGACTCCTTAATG  | ACCCAGGGAATTCAAATGCTC     |
| Il17a           | ACCGCAATGAAGACCCTGATA     | GCACTGAGCTTCCCAGAT        |
| Il17f           | ATTCCAGAACCGCTCCAGTTC     | GGTCTCGAGTGATGTTGTAATCC   |
| Il22            | CATCGTCAACCGCACCTTT       | GCCGGACGTCTGTGTTGTTA      |
| Mmp13           | TTTATTGTTGCTGCCCATGA      | TTTTGGGATGCTTAGGGTTG      |
| Ptgs2           | GGGCCCTTCCTCCCCTAGCA      | CCATGGCCCAGTCCTCGGGT      |
| Reg3b           | ATGCTGCTCTCCTGCCTGATG     | CTAATGCGTGCGGAGGGTATATTC  |
| Reg3g           | CTGTGGTACCCTGTCAAGAGC     | GGCCTTGAATTTGCAGACAT      |
| Spp1            | TCCCCAACGGCCGAGGTGAT      | GCTCAGAAGCTGGGCAACAGGG    |
| Tnfa            | GACCCTCACACTCAGATCATCTTCT | CCACTTGGTGGTTTGGTACGA     |

  

| Bacterial name | Forward primer (5'-3') | Reverse primer (5'-3') |
|----------------|------------------------|------------------------|
| Bacteroides    | GGTTCTGAGAGGAAGGTCCC   | GCTGCCTCCCGTAGGAGT     |
